# Supplementary material for: Brain and hormonal alterations of early trauma linked to binge-like eating
Source: Research Square preprint supplement (doi:10.21203/rs.3.rs-7483524/v1), 2025-09-09
Supplement: Supplementary file 1 [file b8a36d67e104b6954638f6fd.docx]

**Title:** Brain and hormonal alterations of early trauma linked to binge-like eating

**Running title:** Early trauma: brain–hormone links to binge eating

**Authors**: Perla Ontiveros-Ángel*, Timothy B. Simon*****, Julio Sierra*****,Julia Ko,Vivianna Williams, Arianna Williams,Fransua Sharafeddin, James Collins, Andre Obenaus, Pablo González, Raul Andero, Johnny D. Figueroa

**Authors contributed equally to this work*.

**SUPPLEMENTARY FIGURES**

**S1. Adolescent trauma increases proxies of emotional reactivity in rats.**

**a** Adolescent trauma (AT) increased anxiety-like behavior in the elevated plus maze (EPM), as AT-exposed young adult rats (PND61) spent less time in the open arms compared to controls. **b** Differences in locomotor activity did not explain this effect, as total distance traveled in the EPM did not differ between groups. **c** Sensorimotor reactivity, assessed by the acoustic startle reflex (ASR), showed no changes in overall startle amplitude relative to baseline. **d** However, latency to peak ASR revealed a significant trauma × diet interaction, with WD-fed AT rats exhibiting shorter latencies, suggesting enhanced hypervigilance-like responses under obesogenic conditions. Data = mean ± SEM. Individual data points are shown, with females represented by purple circles and males by green squares. **CD**, control diet; **WD**, Western diet. *F*-statistics are reported in **S Table 8**.


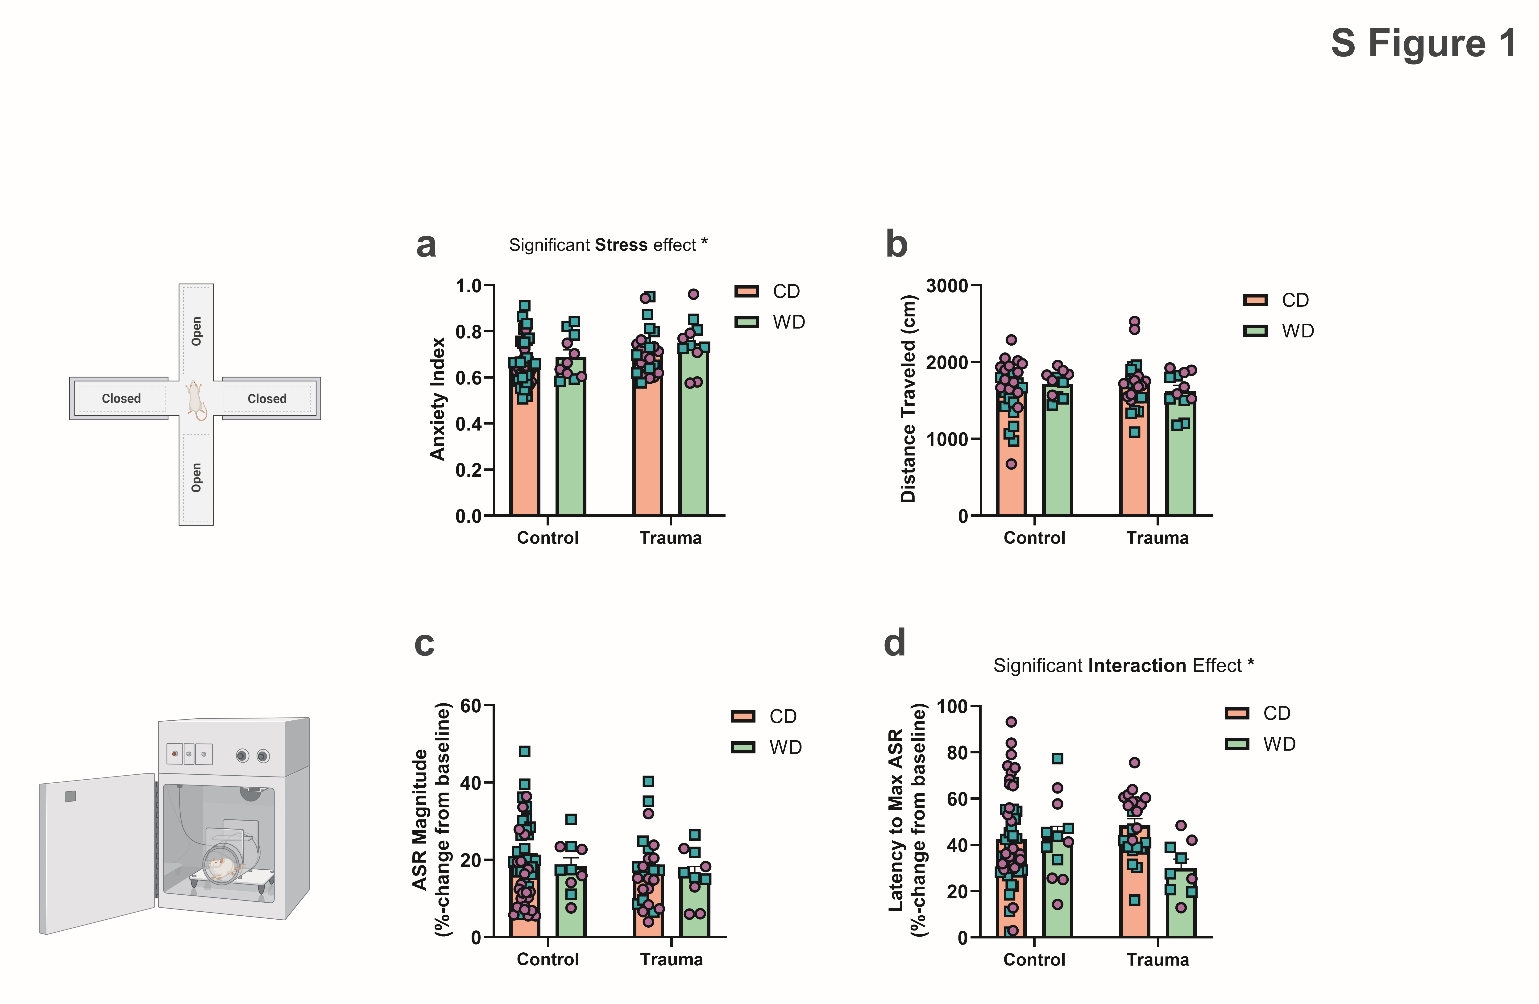


**S2. Phenotyper-derived naturalistic behaviors are impacted by diet and trauma.**

Heatmap of naturalistic behaviors detected and monitored in home cage systems. Standardized phenotypic Z behavioral profile was significantly affected. Each behavior is listed on the left-hand side. Drinking, eating, rearing unsupported, twitching, grooming, and distance were significantly altered according to dietary pattern, stress, or interaction. Symbols denote significant main or interaction effects. * = significant dietary pattern effect; τ = trauma effect, = interaction effect. **CD**, control diet; **WD**, Western diet; **INT**, intermittent. *F*-statistics are reported in **S Table 9**.


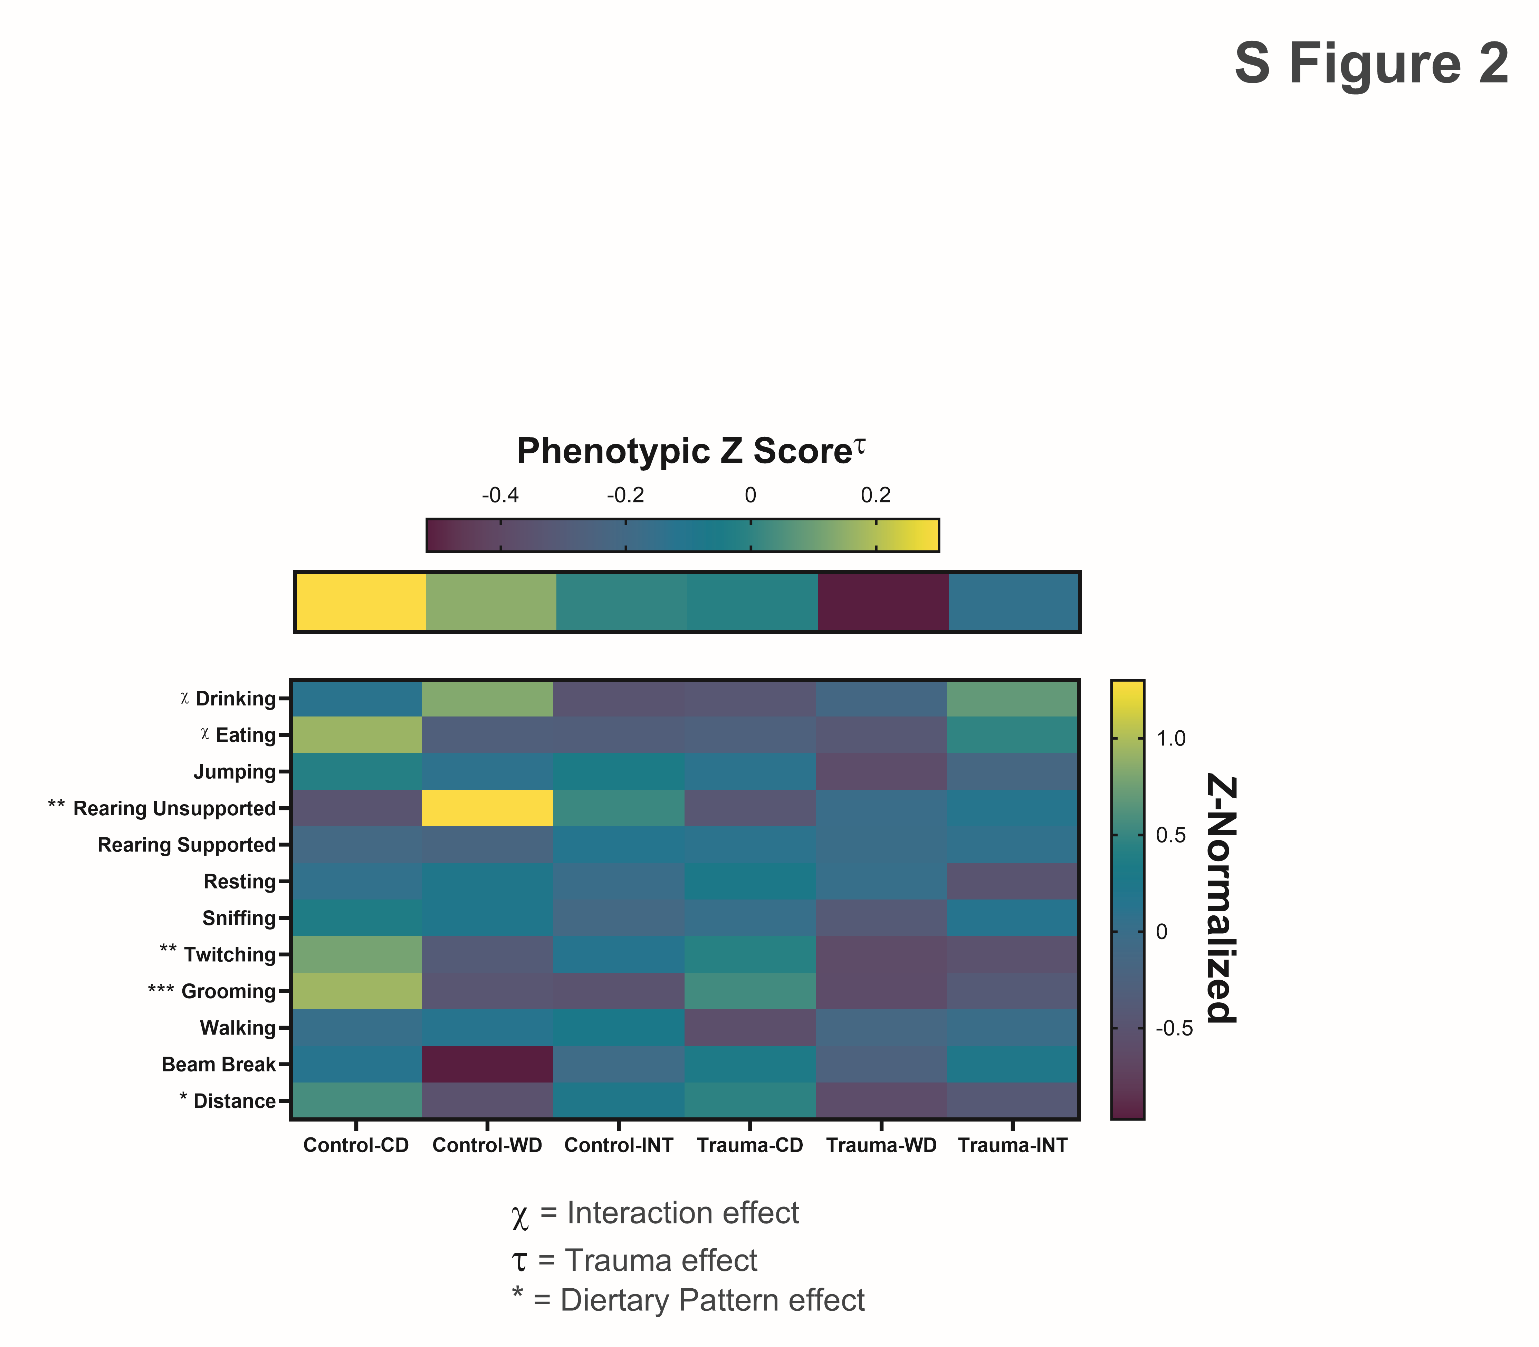


**S3. Z-scored neuroimaging metrics for hippocampal subfields and hypothalamic nuclei.**

Diffusion MRI–derived indices (MD, AD, FA, RD) were z-scored across hippocampal and hypothalamic ROIs. Trauma–diet exposure produced consistent structural alterations, with hippocampal subfields (dCA3, vCA1) and hypothalamic nuclei (DMH, LHA) showing the strongest divergence from controls. *F*-statistics are reported in **S Table 10**.


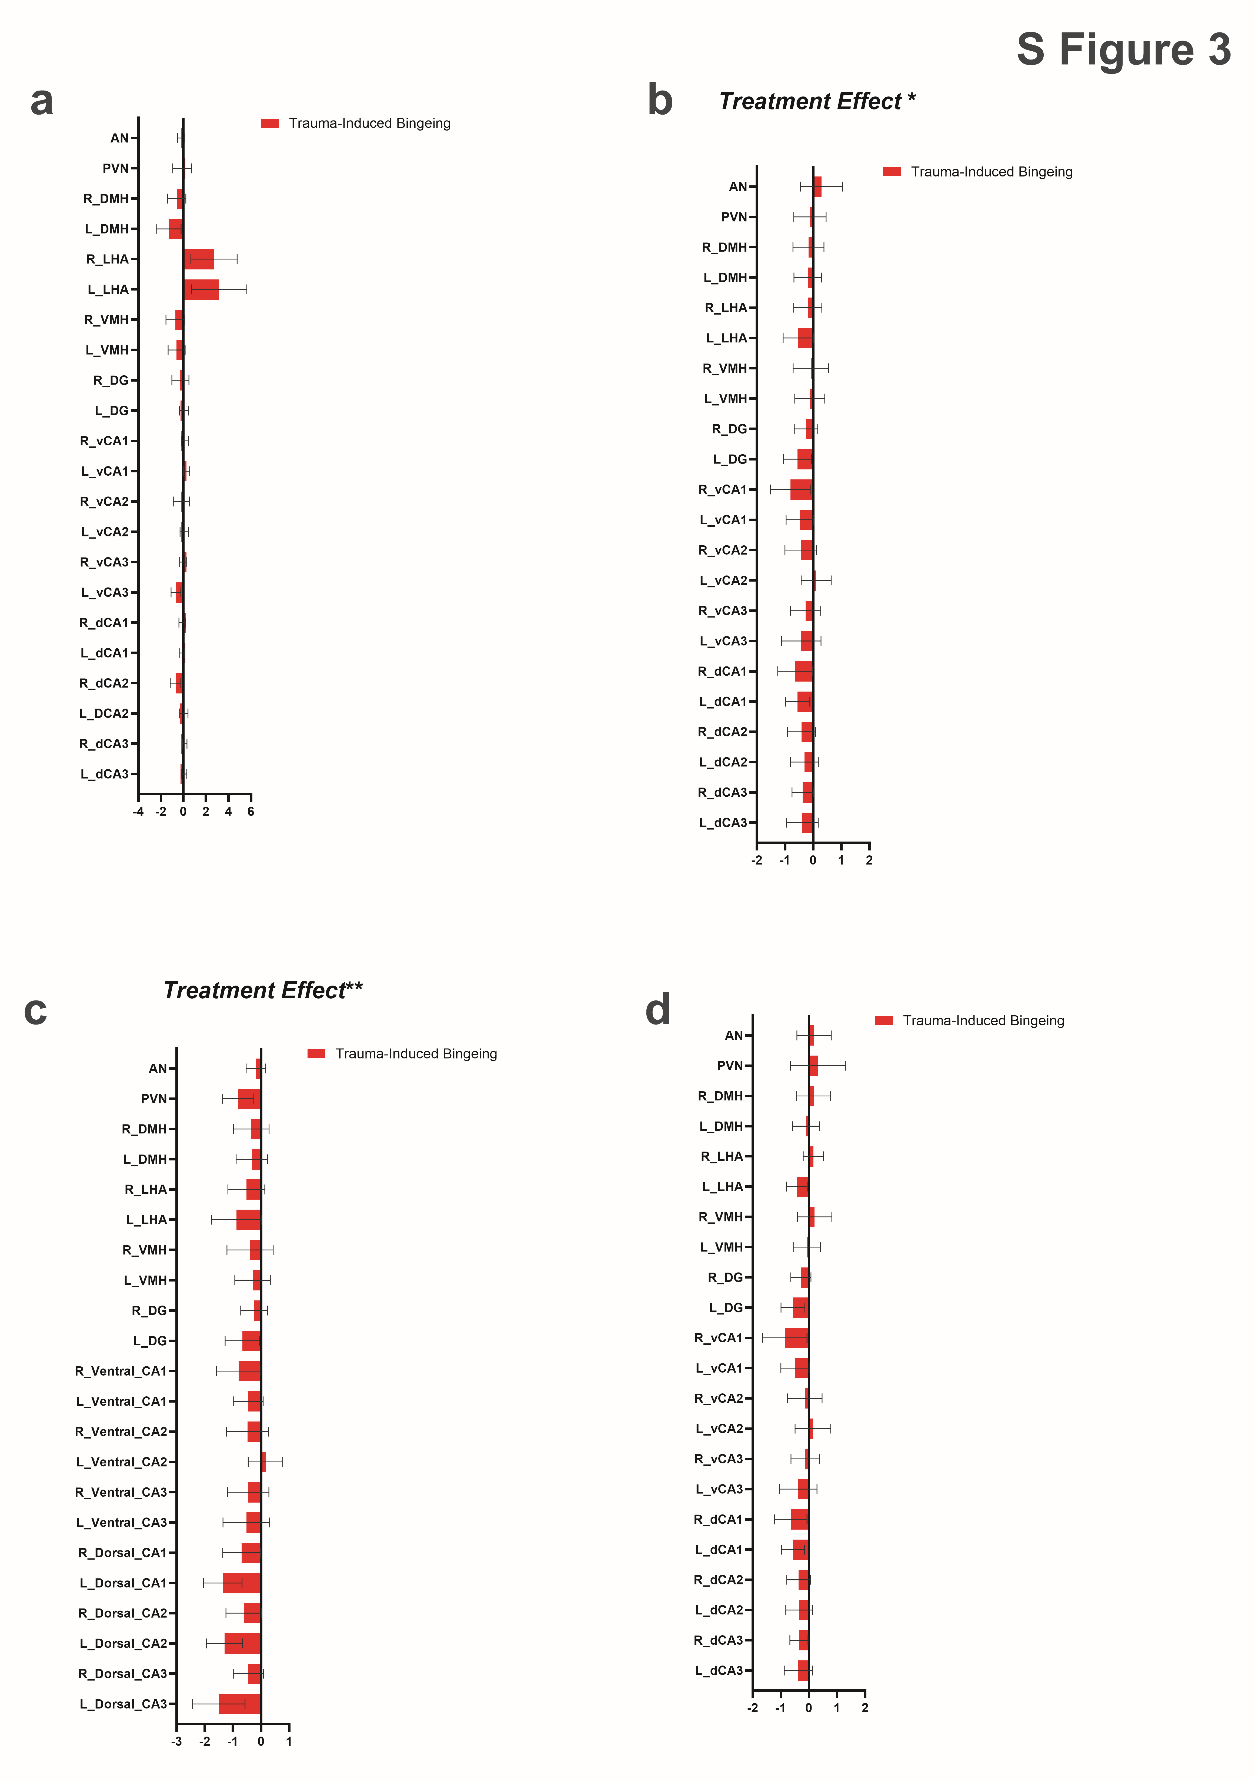


**S4. Weekly consumption during the binge-eating paradigm.**

**a-d** Caloric intake was tracked longitudinally across the three binge-eating (BE) cycles. In males, WD–INT rats consumed significantly fewer calories than both CD and WD groups during initial exposure, whereas in females, AT exposure increased intake, particularly in CD rats. Data = mean ± SEM. Individual data points are shown, with females represented by purple circles and males by green squares. **CD**, control diet; **WD**, Western diet; **INT**, intermittent. *F*-statistics are reported in **S Table 11**.

**
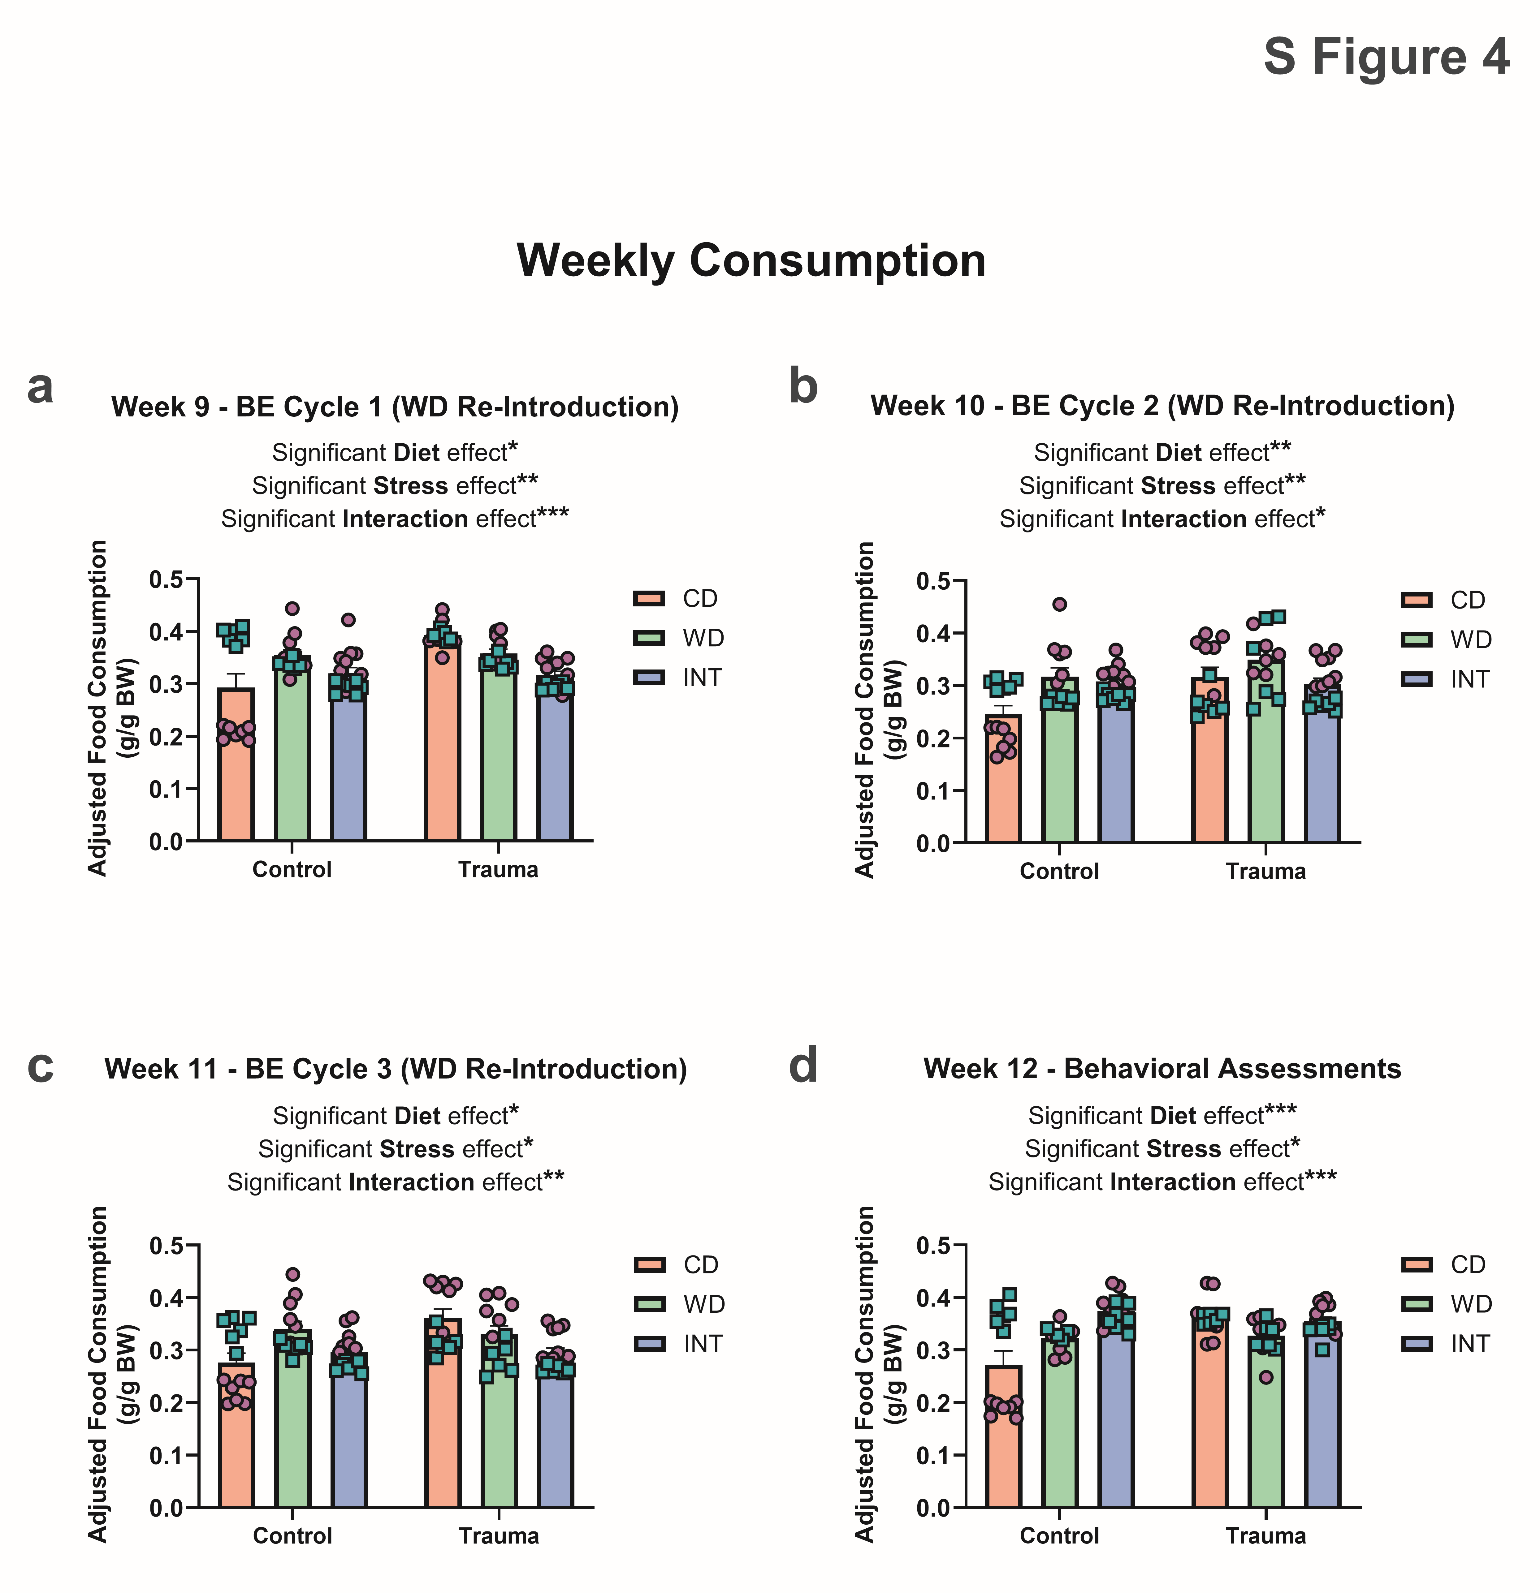
**

**S5. Food intake across experimental manipulations.**

Line graphs showing weekly weight-adjusted food intake for females (**a**, top) and males (**b**, bottom) during the 31-day psychosocial stress protocol (yellow background) and binge-eating paradigm (green). Data = mean ± SEM. Error bars (SEM) are sometimes obscured by the symbols. **AT**, adolescent trauma; **CD**, control diet; **WD**, Western diet; **INT**, intermittent. Statistics are detailed in **S Table 12**.


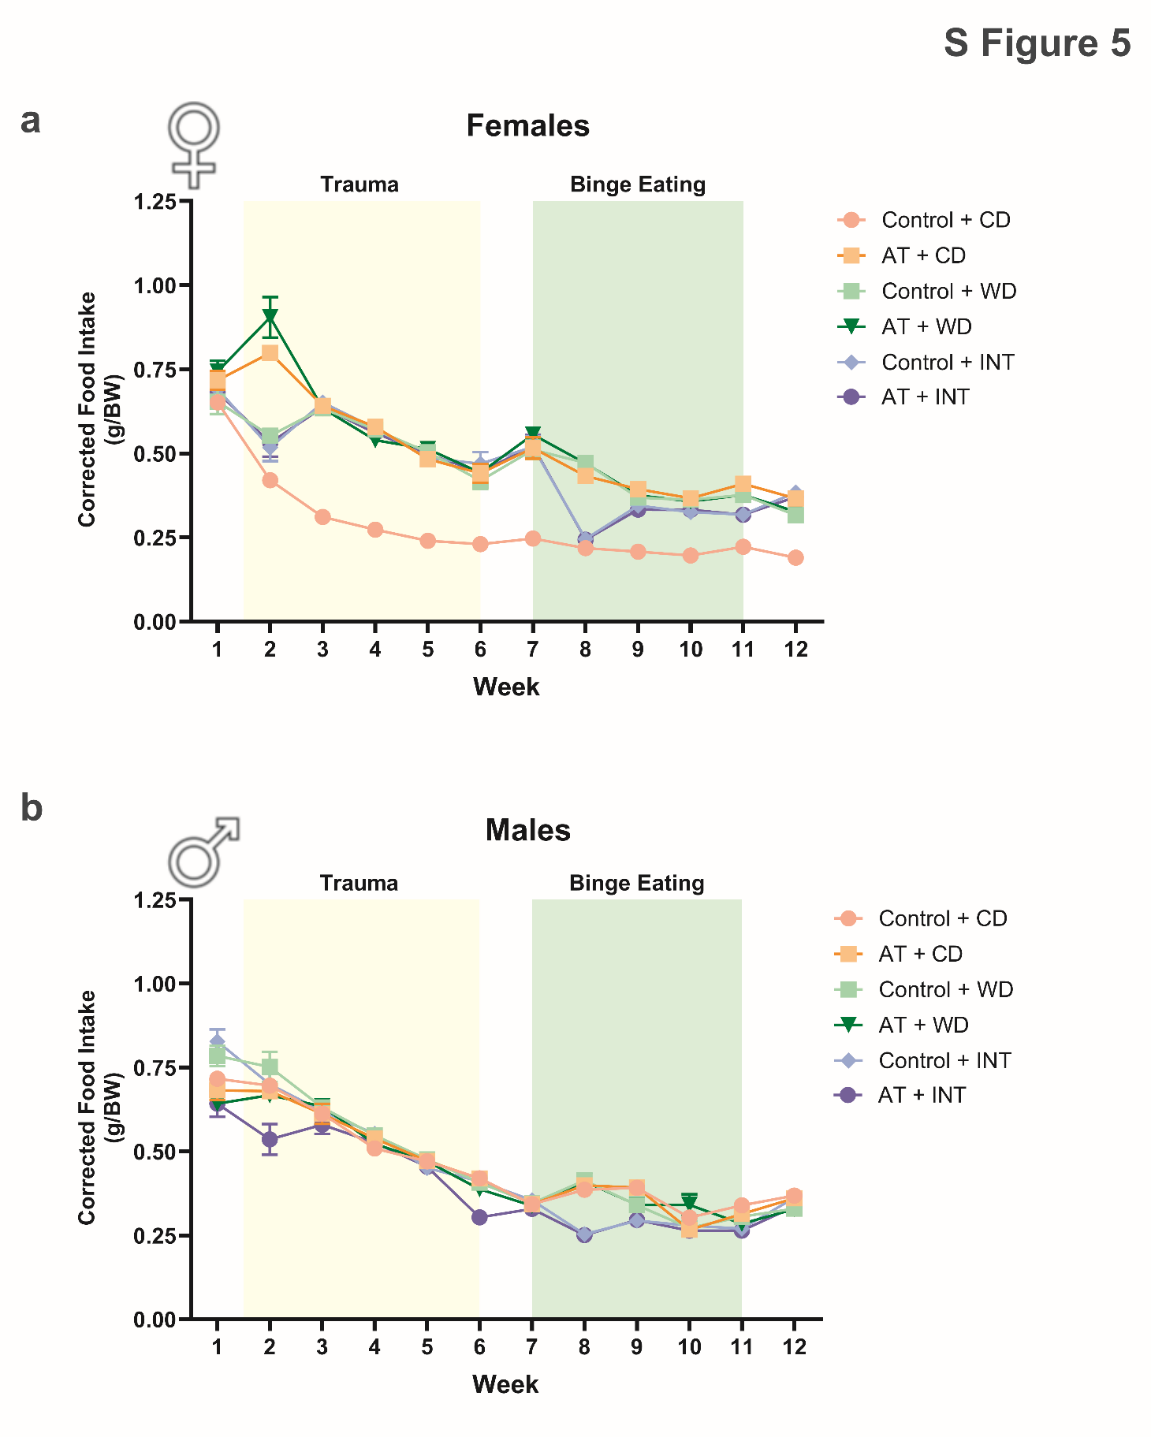


**S6. Effects of adolescent trauma and diet on caloric intake during WD and WD-INT exposure.** **a,b** When WD was first introduced, males in the WD-INT group consumed fewer calories per gram of body weight than CD controls, while females showed a significant stress × diet interaction: unexposed WD-INT rats ate more, whereas AT-exposed WD-INT rats ate less than CDs. Trauma exposure further increased caloric intake in females, particularly in those with CDs. **c,d** During the first week of the binge-eating episode, WD-INT males consumed noticeably fewer calories than both the CD and WD groups, while in females, this reduction was limited to AT-exposed WD-INT rats. **e,f** By week 2, males showed a stress × diet interaction, with WD rats eating more and CD/WD-INT rats eating slightly less than unexposed controls. In females, the stress × diet interaction persisted, with AT consistently increasing intake in CDs. **g,h** In the final week, males exhibited main effects of both diet and stress, with AT reducing intake, whereas females continued to show trauma-induced hyperphagia under CD conditions. Overall, these results suggest that trauma selectively increased caloric intake in females under the control diet, indicating a sex-specific vulnerability to trauma-induced hyperphagia. **CD**, control diet; **WD**, Western diet; **INT**, intermittent, **M**, male; **F**, female. *F*-statistics are reported in **S Table 13**.

**
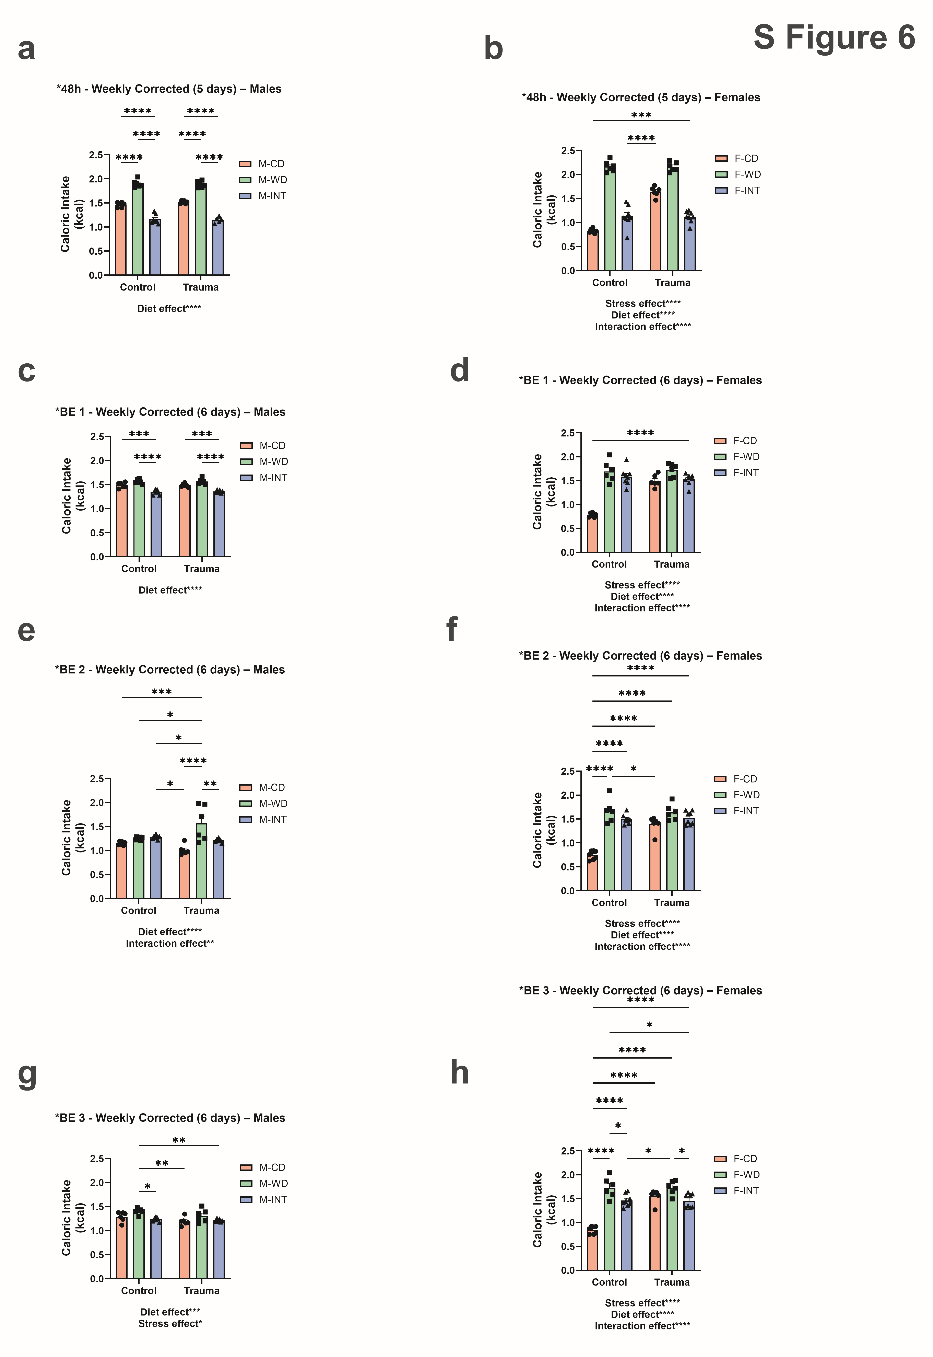
**

**S7. Body weight trajectories across experimental manipulations.**

Line graphs showing weekly body for females (**a**, top) and males (**b**, bottom) during the 31-day psychosocial stress protocol (yellow background) and binge-eating paradigm (green background). WD consumption was associated with increased weight gain. **S Table 14** contains details about statistical analyses. **AT**, adolescent trauma; **CD**, control diet; **WD**, Western diet; **INT**, intermittent.


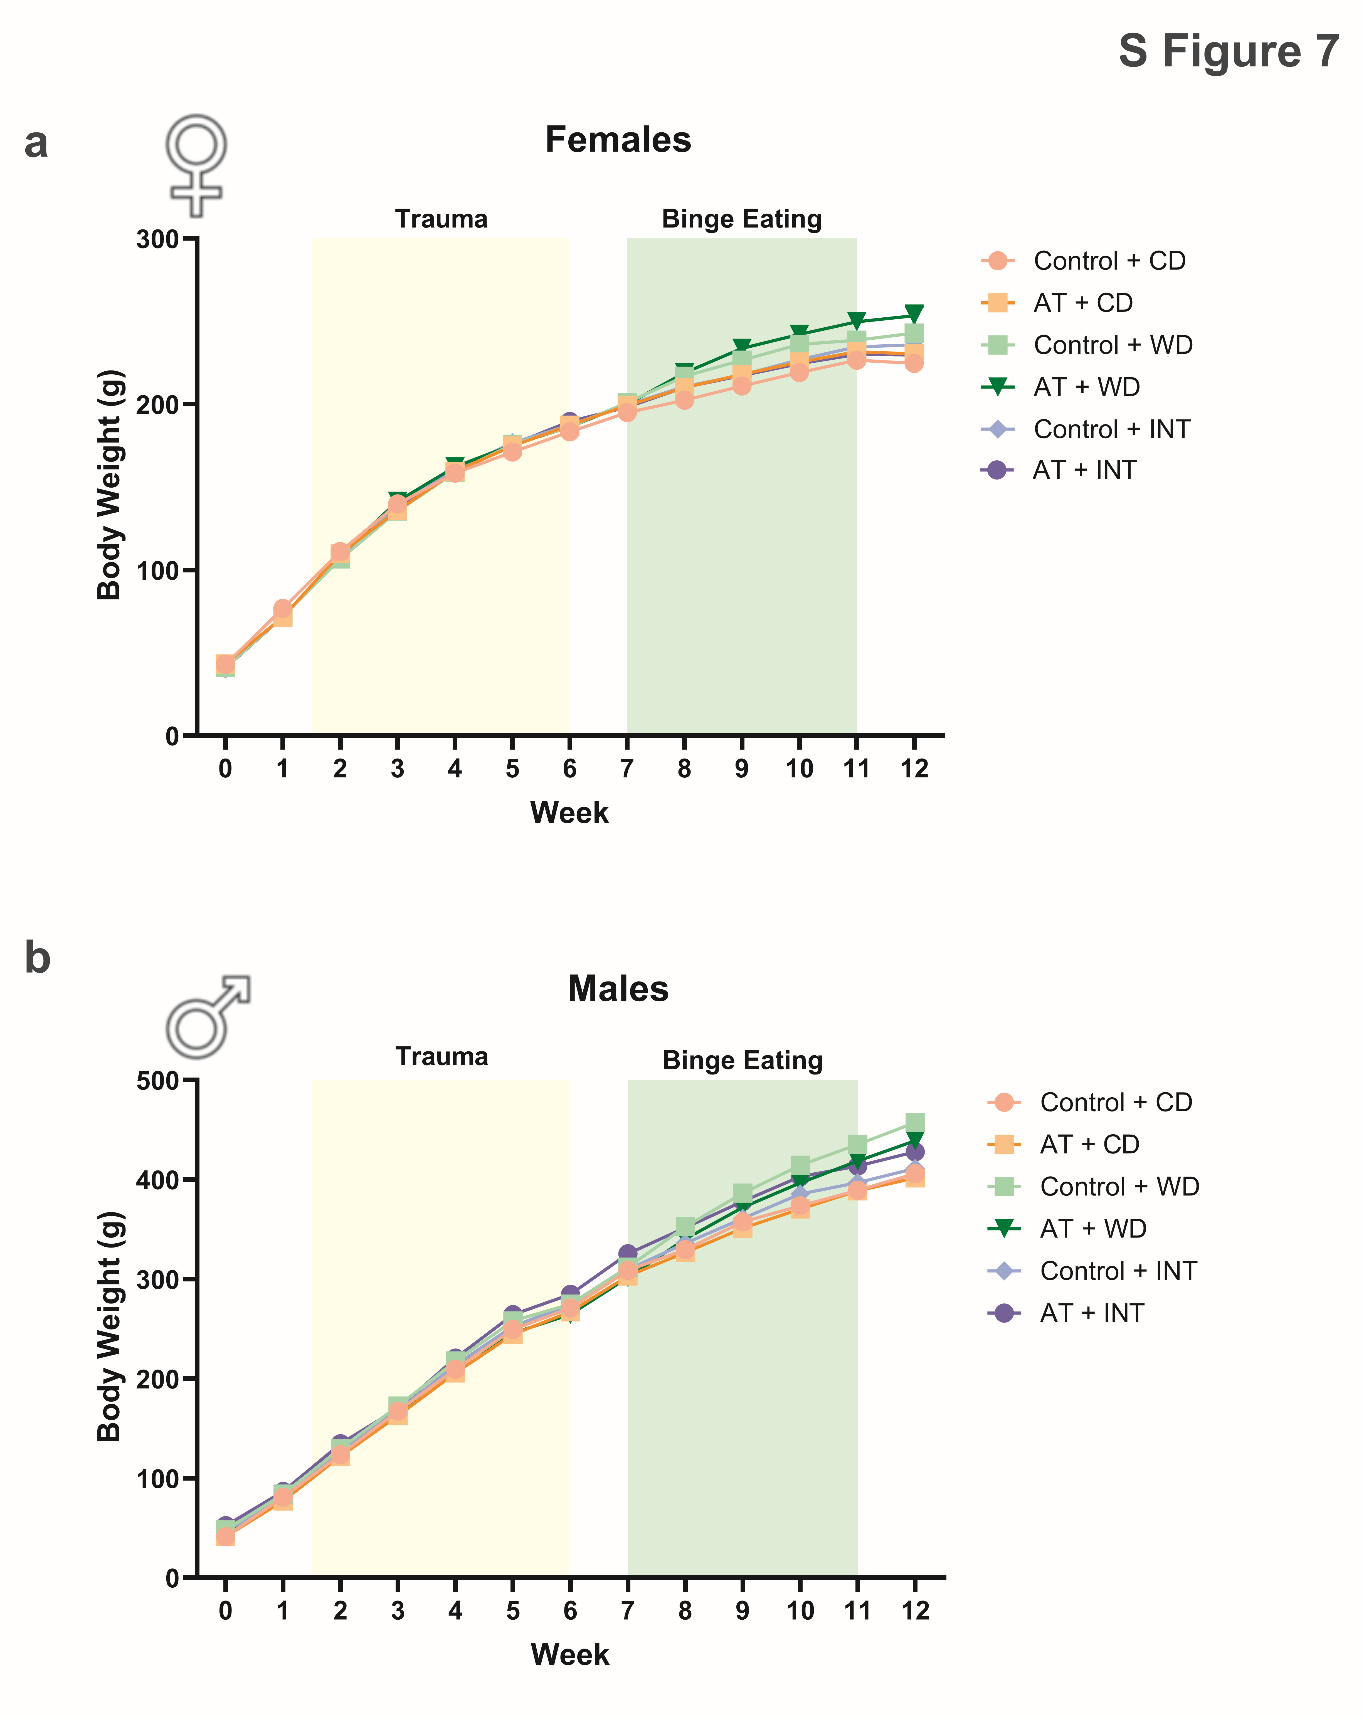


**S8. Diffusion MRI revealed sex-specific structural integrity changes in hippocampal and hypothalamic regions.** **a** Representative maps of diffusion MRI parameters, including corrected tensor components for fractional anisotropy (FA), axial diffusivity (AD), radial diffusivity (RD), mean diffusivity (MD), and FA overlaid on the first eigenvector. The figure also shows the rat brain template and the aligned B0 images. MC, male control; MT, male trauma-exposed; FC, female control; FT, female trauma-exposed. **b** The heatmap illustrates that FA was generally reduced in female rats exposed to adolescent trauma. Trauma-induced bingeing in males results in an overall increase in FA, demonstrating an opposite effect. **c,d** FA Z scores for each hippocampal and hypothalamic subfield in males and females. **c** Analyses indicate a reduction in FA in AT-WD-INT females, notably in the left dorsomedial hypothalamus (DMH). **d** Conversely, FA was elevated in males, with the left and right lateral hypothalamic areas (LHA) showing greater impacts of AT-WD-INT exposure. Sample size = 4 per group; one outlier was removed in the male control group due to MRI scan artifacts. Abbreviations are detailed below. **FC**, female control; **FT**, female trauma; **MC**, male control; **MT**, male trauma. *F*-statistics are reported in **S Table 15**.

**
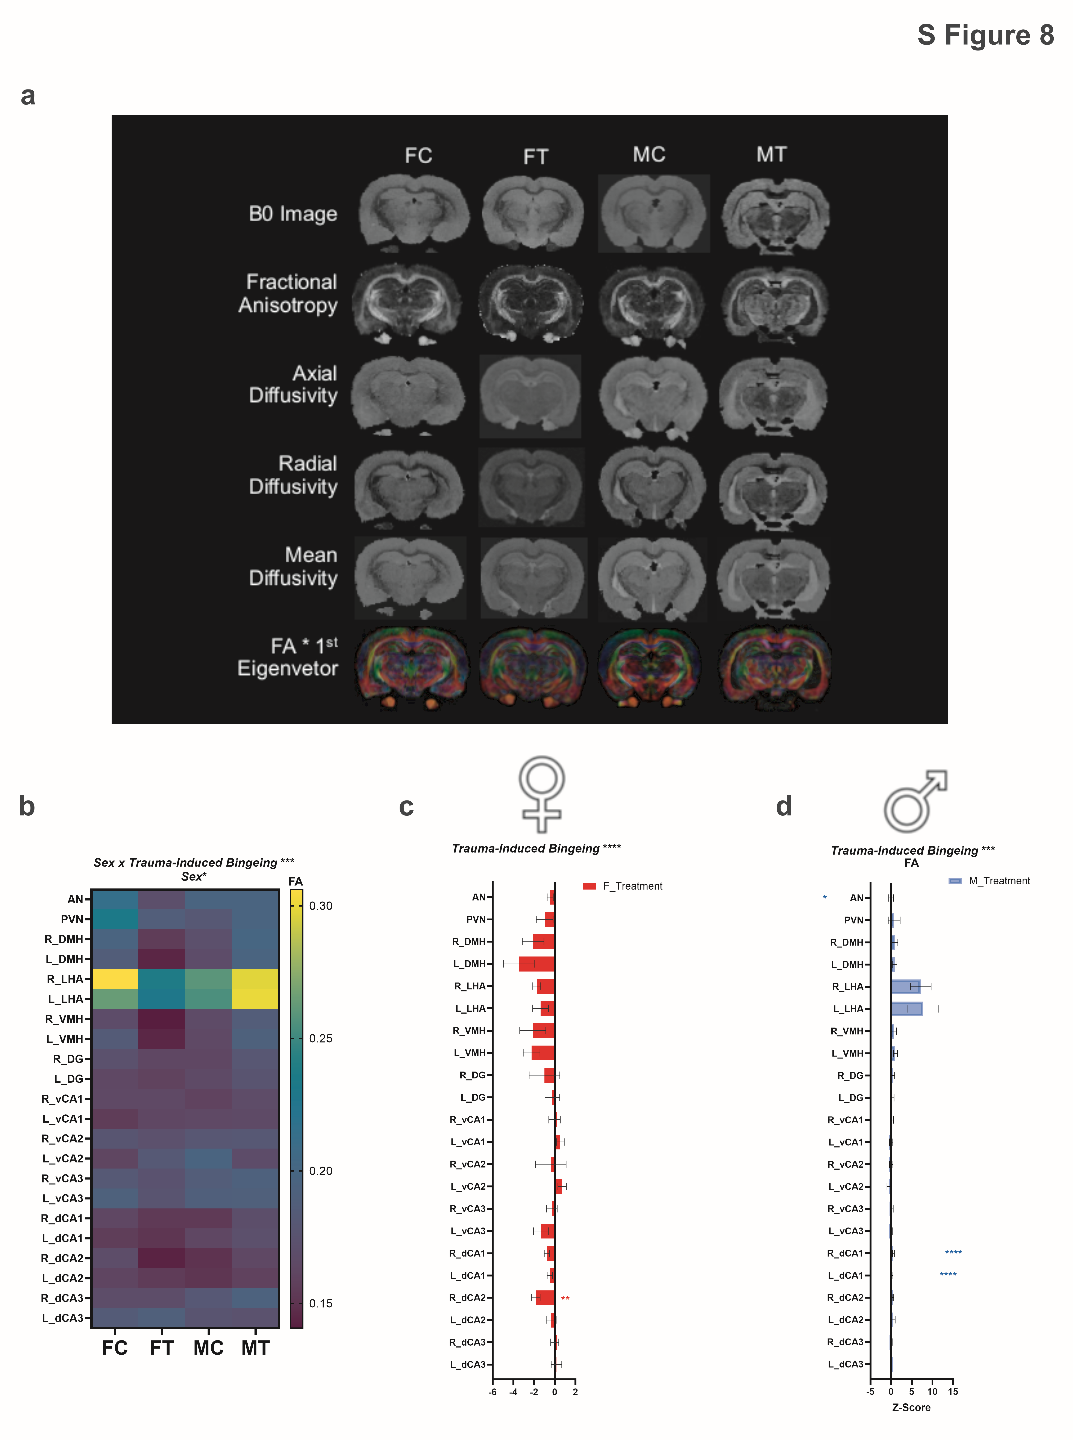
**

**S9. Regional associations and structural connectivity differences between sexes.**
**a-e** Structural connectivity mapping identified hippocampal–hypothalamic pathways as critical substrates of binge-eating vulnerability. Females showed differential correlations between left ventral CA1 (lvCA1) and dorsomedial hypothalamic (DMH) nuclei. Thicker ribbons indicate enhanced connectivity. **f-h** FA tractography of streamlines linking the ventral CA1 (vCA1) and dorsomedial hypothalamus (DMH) revealed striking sex-dependent differences. A significant interaction emerged, with females (**f**) showing tract alterations localized closer to the DMH, while in males (**g**), changes were concentrated near vCA1. **h** Percent FA change from controls highlights these divergent structural adaptations, underscoring a sex-specific reorganization of hippocampal–hypothalamic pathways. Sample size = 4 per group; one outlier was removed from the male control group due to MRI scan artifacts. Abbreviations are explained later in this document. **L_vCA1**, left ventral CA1; **L_DMH**, left dorsomedial hypothalamic nucleus. Please refer to **S Table 16** for statistics and power analyses results.

**
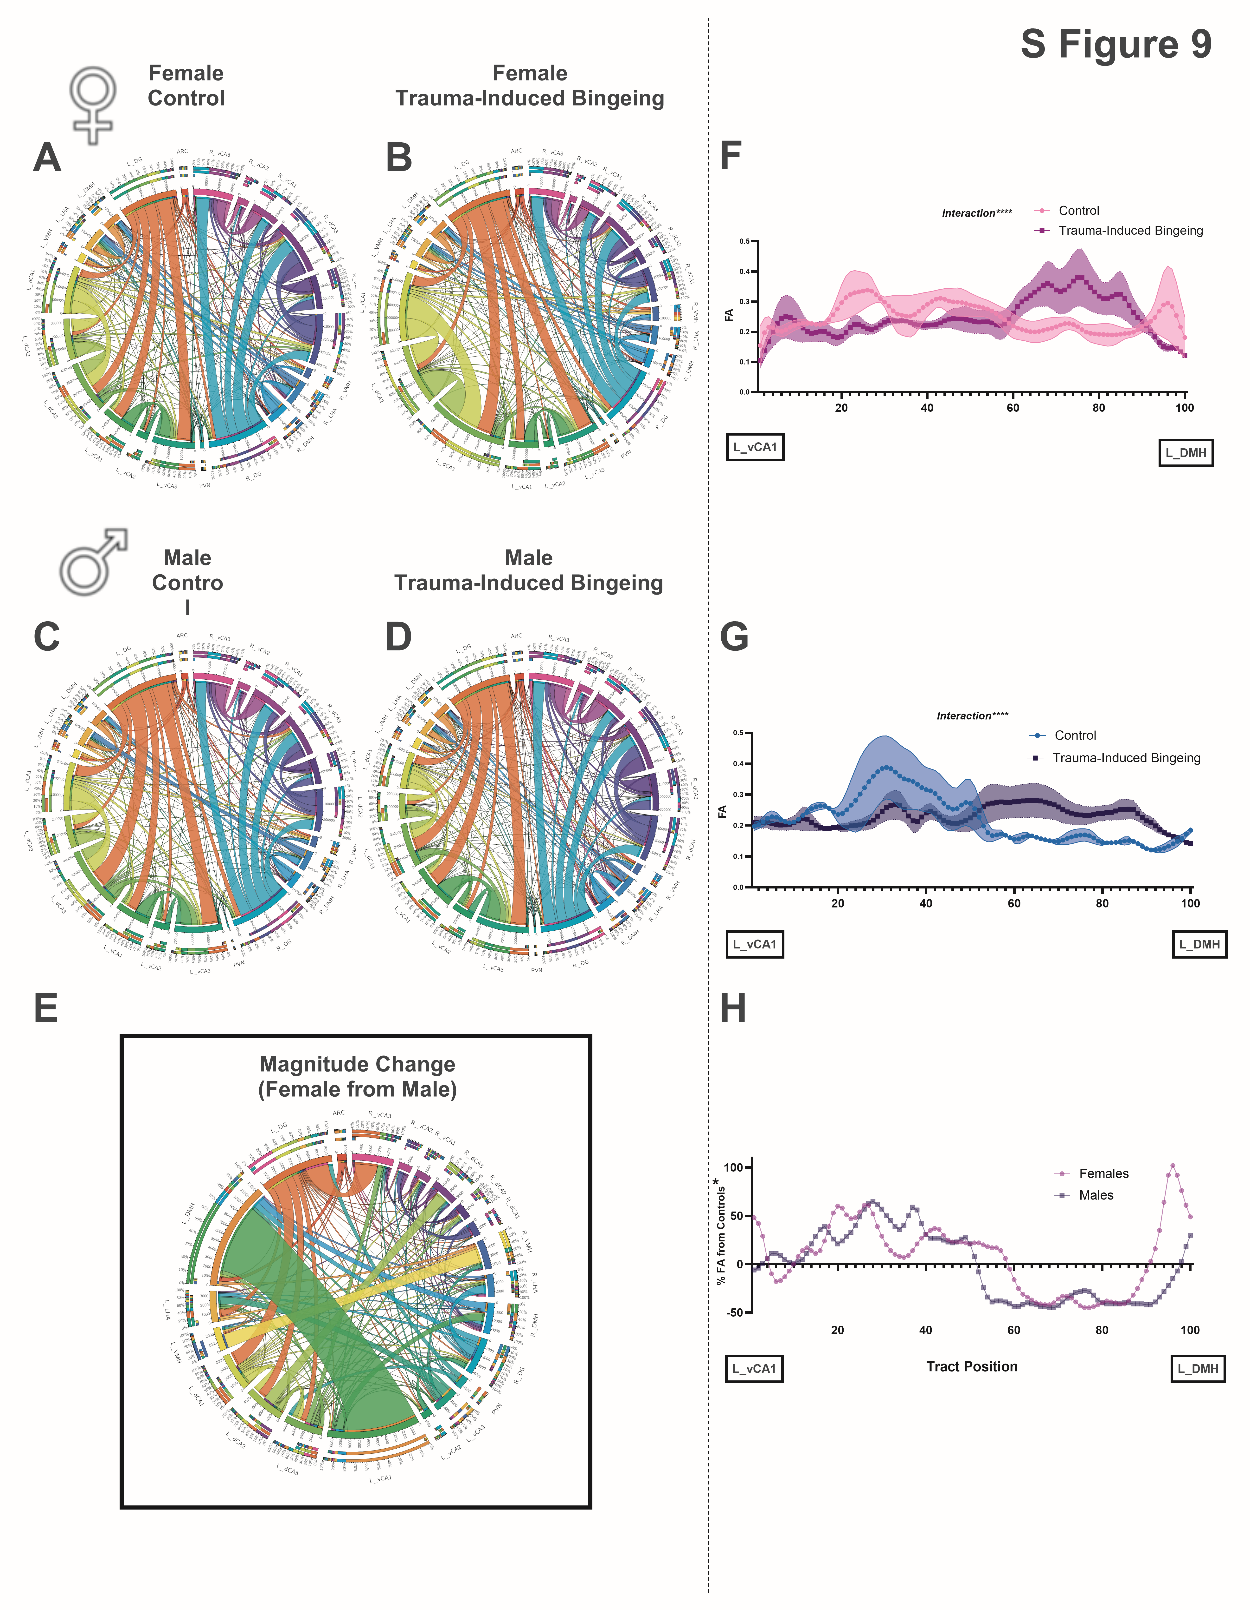
**

**S10. Estrous cycle alterations following adolescent trauma and diet.**
**a** Estrous cycle stages in rats with corresponding hormone fluctuations. Stages were determined by vaginal cytology.  **b–e** Relative time spent in proestrus, estrus, metestrus, and diestrus across three cycles. **f** Estrous cyclicity across 12 days. Analyses revealed significant trauma × diet interactions on cycle phase length. Under a control diet, trauma extended metestrus, a low-estrogen phase associated with increased appetite and reduced social motivation. In contrast, under a WD, trauma prolonged diestrus, another low-estrogen phase linked to heightened reward sensitivity to palatable foods and impaired satiety signaling. These changes in cyclicity parallel the binge-eating phenotype observed in trauma-exposed females, suggesting that the dietary environment modulates the hormonal state through which trauma influences feeding behavior. **CD**, control diet; **WD**, Western diet; **INT**, intermittent. *F*-statistics are reported in **S Table 17**.

**
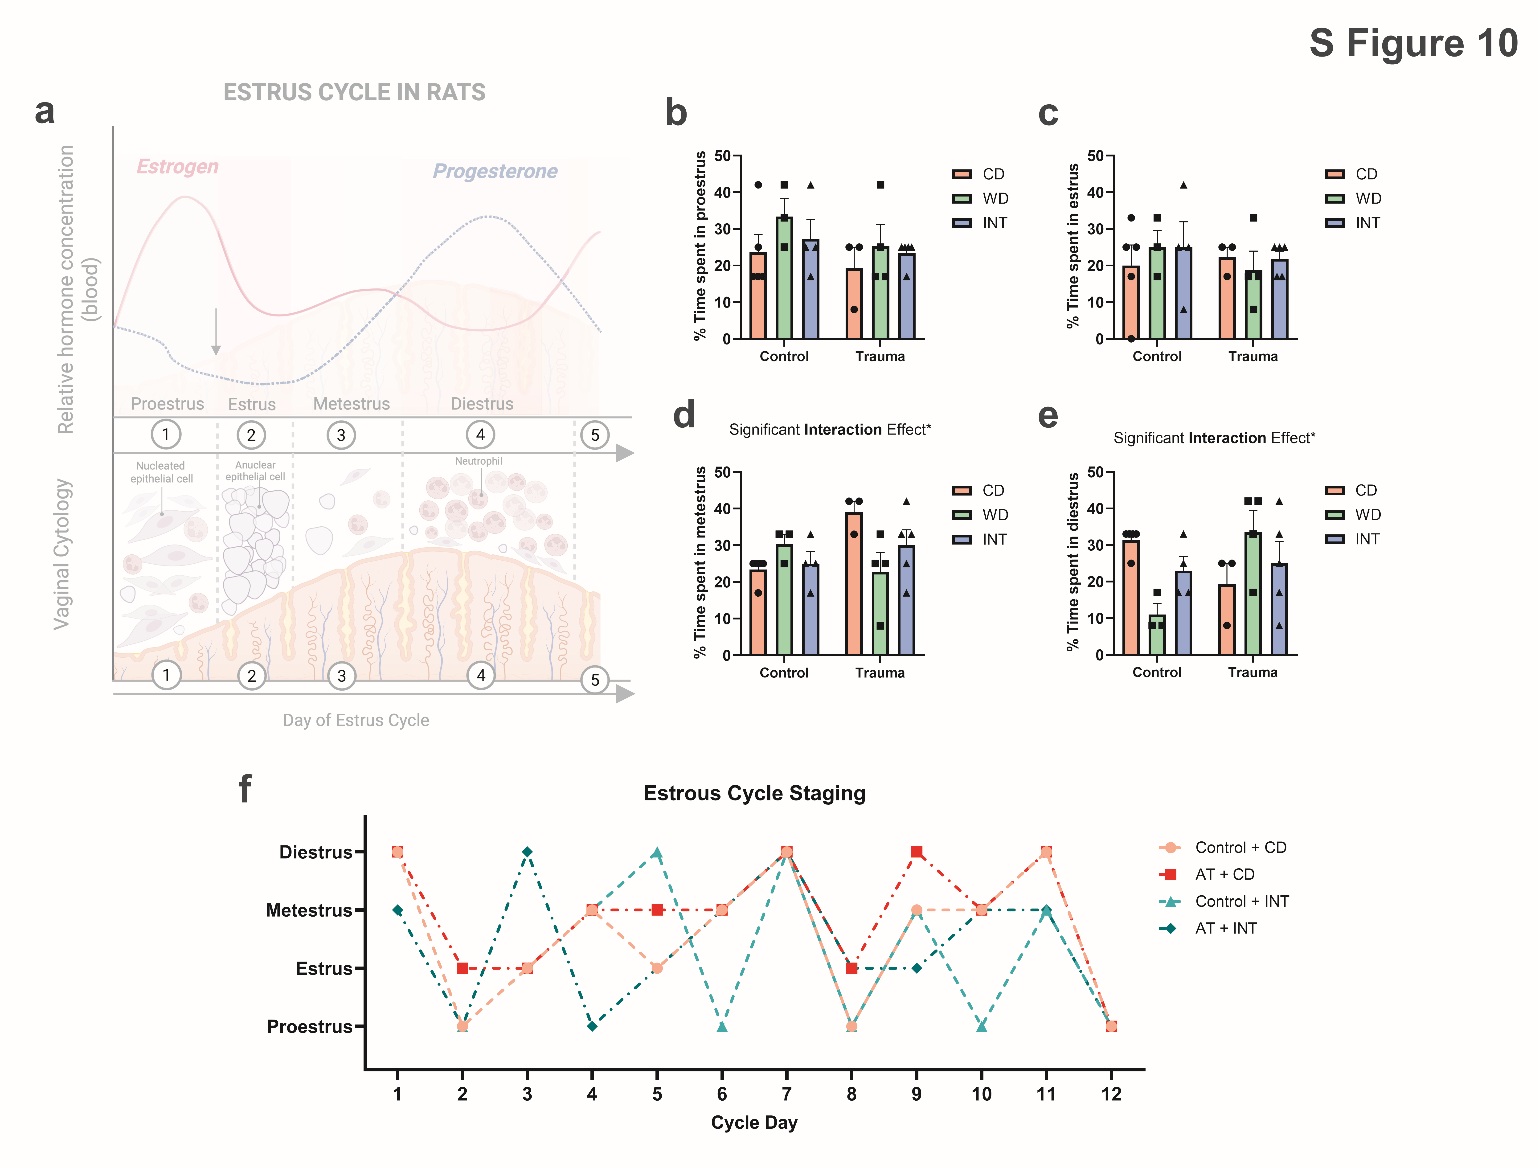
**

**ABBREVIATIONS**

| AD | Axial Diffusivity |
| --- | --- |
| AI | Anxiety index |
| AN | Arcuate Nucleus |
| ANOVA | Analysis of variance |
| ASR | Acoustic startle reflex |
| AT | Adolescent Trauma |
| BE | Binge eating paradigm |
| BLA | Basolateral amygdala |
| BNST | Bed nucleus of the stria terminalis |
| CA | Closed arm |
| CA1 | Cornu Ammonis 1 |
| CA2 | Cornu Ammonis 2 |
| CA3 | Cornu Ammonis 3 |
| CD | Control diet |
| CDU | Control diet |
| dB | Decibel |
| dCA1 | Dorsal CA1 |
| dCA2 | Dorsal CA2 |
| dCA3 | Dorsal CA3 |
| dDG | Dorsal Dentate Gyrus |
| DG | Dentate Gyrus |
| DMH | Dorsal medial hypothalamus |
| DTI | Diffusion tensor imaging |
| ELISA | Enzyme-linked immunosorbent assay |
| EPM | Elevated Plus Maze |
| FA | Fractional anisotropy |
| h | hour |
| HPA axis | Hypothalamic-pituitary adrenal axis |
| HPG | Hypothalamic–pituitary–gonadal axis |
| IACUC | Institutional animal care and use committee |
| INT | Intermittent |
| LHA | Lateral hypothalamic area |
| MD | Medial Diffusivity |
| MRI | Magnetic resonance imaging |
| ns | not significant |
| OA | Open arm |
| OFT | Open field test |
| PBS | Phosphate-buffered saline |
| PFA | Paraformaldehyde |
| PFC | Prefrontal cortex |
| PND | Post-natal day |
| PSS | Psychosocial Stress |
| PVN | Paraventricular nucleus of the hypothalamus |
| RD | Radial Diffusivity |
| ROI | Region of interest |
| SYM | Social Y Maze |
| vCA1 | Ventral CA1 |
| vCA2 | Ventral CA2 |
| vCA3 | Ventral CA3 |
| vDG | Ventral Dentate Gyrus |
| vSb | Ventral subiculum |
| VTA | Ventral tegmental area |
| WD | Western Diet |
| WD-INT | Intermittent WD |

**Supplementary TABLES**

**S Table 1. Detailed composition of the ingredient-matched diets.**

| **Macronutrient** | **Control Diet (CD)**  13% kcal from fat | **Western Diet (WD)**  41% kcal from fat |
| --- | --- | --- |
| % kcal Carbohydrates (corn starch) | 64.7 | 43.1 |
| % kcal Protein (casein) | 18.8 | 15.5 |
| % kcal Fat (milk fat) | 16.5 | 41.4 |
| % kcal Total kcal | 3.8 | 4.6 |
| **Fatty Acid Class** | **g/kg Diet** | **g/kg Diet** |
| Butryic (C4:0) | 0.69 | 4.29 |
| Caproic (6:0) | 0.5 | 3.18 |
| Caprylic (C8:0) | 0.32 | 2.01 |
| Capric (C10:0) | 0.74 | 4.79 |
| Lauric (C12:0) | 0.91 | 5.76 |
| Myristic (C14:0) | 3.05 | 19.2 |
| Myristoleic (C14:1) | 0.26 | 1.63 |
| Pentadecanoic (15:0) | 0.32 | 2 |
| Palmitic (C16:0) | 11.7 | 58.5 |
| Palmitoleic (C16:1) | 0.45 | 2.83 |
| Heptadecanoic (17:0) | 0.17 | 1.02 |
| Stearic (C18:0) | 3.39 | 19.4 |
| Oleic (C18:1) | 11.2 | 37.9 |
| Linoleic (C18:2) | 12.3 | 9.82 |
| Alpha Linolenic (C18:3) | 0.32 | 0.84 |
| Arachidic (20:0) | 0.11 | 0.27 |
| Homogamma Linolenic (20:3) | <0.07 | 0.19 |
| Arachidonic (n6) 20:4 | <0.07 | 0.28 |
| EPA (20:5 n-3) | <0.07 | <0.1 |
| DHA (22:6 n-3) | <0.07 | <0.1 |
| SFA | 20.8 | 114 |
| MUFA | 12.4 | 46.5 |
| PUFA | 11.8 | 10.8 |
| Omega 3 Fatty Acids | 0.32 | 0.94 |
| Omega 6 Fatty Acids | 12 | 10.3 |

**S Table 2. Summary of neuroimaging parameter descriptors and interpretation.**

| **Parameter** | **Abbreviation** | **Description** |
| --- | --- | --- |
| **Fractional Anisotropy** | **FA** | Water molecule diffusion is typically isotropic in the absence of obstacles, allowing molecules to move freely in all directions. However, the presence of structures like macromolecules and cell membranes can alter this pattern. When water molecules are confined within structures such as axons or tubes, diffusion predominantly occurs along their length, resulting in anisotropic diffusion. The extent of this anisotropy can be measured and provides information about changes in properties like axonal diameter, fiber density, or myelin integrity. A decrease in fractional anisotropy (FA) is linked to lower neurite density, while increased orientation dispersion indicates compromised white matter integrity. |
| **Axial Diffusivity** | **AD** | The diffusion coefficient along the ellipsoid's long axis, typically aligned with the axon, is described here. A lower AD suggests diminished integrity of white matter. |
| **Medial Diffusivity** | **MD** | This describes the water diffusion magnitude within brain tissue that remains consistent regardless of orientation. Variations in mean diffusivity (MD) may indicate changes within the intra- and extracellular spaces or overall increases in cerebrospinal fluid (CSF). MD is a sensitive yet non-specific metric that can be influenced by any disease process affecting barriers like cell membranes, which restrict water movement. |
| **Radial Diffusivity** | **RD** | The diffusion coefficient measured perpendicular to the long axis. A higher RD suggests decreased integrity of the white matter. |
| **Anisotropic-weighted volume** | **AWV** | AWV measures the level of anisotropy in a space. It offers a single combined metric that reflects both size and integrity. |

**S Table 3. Sample dilution and assay specifications for reproductive hormone measurements.**

| **Hormone** | **Dilution Factor** | **Absorbance wavelength (nm)** | **Assay range (pg/mL)** | **Sensitivity (pg/mL)** | **Cat. No.** | **Vendor** |
| --- | --- | --- | --- | --- | --- | --- |
| Corticosterone | 1:10 | 405, 570 | 32–20,000 | 27 | ADI-900-097 | Enzo Life Sciences |
| Estradiol | 1:10–1:20 | 405, 570 | 29.3–30,000 | 28.5 | ADI-901-008 | Enzo Life Sciences |
| Progesterone | 1:1000–1:20,000 | 405, 570 | 15.62–500 | 8.57 | ADI-900-011 | Enzo Life Sciences |
| Testosterone | 1:50–1:100 | 450, 570 | 40.96–10,000 | 15.2 | K032-H5 | Arbor Assays |

**S Table 4. Sex-dependent effects of adolescent trauma and diet on postprandial leptin levels.** Leptin was measured 90 min after a Western diet (WD) challenge in non-food-restricted rats. In females, trauma significantly increased leptin levels, with a strong diet effect showing higher levels in WD-fed rats compared to controls. In males, trauma decreased leptin levels, with no observed dietary effect. Leptin response to WD was similar between WD-INT and CD controls, indicating that intermittent WD exposure did not cause significant metabolic changes.

|  |  |  | **Leptin (ng/mL)** |  |
| --- | --- | --- | --- | --- |
|  |  | CD | WD | INT |
| Female | Control | 4.28 ± 0.22 | **11.18 ± 0.75** | 6.73 ± 0.82 |
| AT | 5.55 ± 0.42 | **14.03 ± 1.90** | 7.88 ± 0.81 |
| Male | Control | 14.84 ± 0.96 | 22.74 ± 1.66 | 19.93 ± 5.45 |
| AT | 12.65 ± 1.98 | 18.42 ± 4.67 | 13.58 ± 3.92 |

|  | **ANOVA table** | **SS (Type III)** | **DF** | **MS** | **F (DFn, DFd)** | **P value** |
| --- | --- | --- | --- | --- | --- | --- |
| Leptin | **Diet** | **335.5** | **2** | **167.7** | **F (2, 25) = 6.853** | **0.0042** |
| Three-way | **Sex** | **703.9** | **1** | **703.9** | **F (1, 25) = 28.76** | **<0.0001** |
| ANOVA | Trauma | 14.68 | 1 | 14.68 | F (1, 25) = 0.5998 | 0.4459 |
|  | Diet x Sex | 3.385 | 2 | 1.692 | F (2, 25) = 0.06914 | 0.9334 |
|  | Diet x Trauma | 8.193 | 2 | 4.096 | F (2, 25) = 0.1674 | 0.8468 |
|  | Sex x Trauma | 84.04 | 1 | 84.04 | F (1, 25) = 3.433 | 0.0757 |
|  | Diet x Sex x Trauma | 7.677 | 2 | 3.838 | F (2, 25) = 0.1568 | 0.8557 |
|  | Residual | 611.9 | 25 | 24.48 |  |  |

| **Fig.** | **ANOVA table** | **SS (Type III)** | **DF** | **MS** | **F (DFn, DFd)** | **P value** |
| --- | --- | --- | --- | --- | --- | --- |
| Leptin - | Interaction | 2.685 | 2 | 1.343 | F (2, 12) = 0.4679 | 0.6373 |
| Females | **Trauma** | **13.94** | **1** | **13.94** | **F (1, 12) = 4.858** | **0.0478** |
|  | **Diet** | **185.6** | **2** | **92.80** | **F (2, 12) = 32.34** | **<0.0001** |
|  | Residual | 34.43 | 12 | 2.869 |  |  |

|  | **Test details** | **Mean 1** | **Mean 2** | **Mean diff.** | **N1** | **N2** | **q** | **DF** | **P value** |
| --- | --- | --- | --- | --- | --- | --- | --- | --- | --- |
|  | Control:CD vs. Control:WD | 4.285 | 11.18 | -6.893 | 3 | 3 | 7.049 | 12.00 | 3 |
|  | Control:CD vs. Control:INT | 4.285 | 6.725 | -2.440 | 3 | 3 | 2.495 | 12.00 | 3 |
|  | Control:CD vs. AT:CD | 4.285 | 5.555 | -1.270 | 3 | 3 | 1.299 | 12.00 | 3 |
|  | Control:CD vs. AT:WD | 4.285 | 14.03 | -9.744 | 3 | 3 | 9.963 | 12.00 | 3 |
|  | Control:CD vs. AT:INT | 4.285 | 7.885 | -3.600 | 3 | 3 | 3.681 | 12.00 | 3 |
|  | Control:WD vs. Control:INT | 11.18 | 6.725 | 4.453 | 3 | 3 | 4.553 | 12.00 | 3 |
|  | Control:WD vs. AT:CD | 11.18 | 5.555 | 5.623 | 3 | 3 | 5.750 | 12.00 | 3 |
|  | Control:WD vs. AT:WD | 11.18 | 14.03 | -2.850 | 3 | 3 | 2.915 | 12.00 | 3 |
|  | Control:WD vs. AT:INT | 11.18 | 7.885 | 3.294 | 3 | 3 | 3.368 | 12.00 | 3 |
|  | Control:INT vs. AT:CD | 6.725 | 5.555 | 1.170 | 3 | 3 | 1.197 | 12.00 | 3 |
|  | Control:INT vs. AT:WD | 6.725 | 14.03 | -7.304 | 3 | 3 | 7.468 | 12.00 | 3 |
|  | Control:INT vs. AT:INT | 6.725 | 7.885 | -1.159 | 3 | 3 | 1.185 | 12.00 | 3 |
|  | AT:CD vs. AT:WD | 5.555 | 14.03 | -8.474 | 3 | 3 | 8.665 | 12.00 | 3 |
|  | AT:CD vs. AT:INT | 5.555 | 7.885 | -2.330 | 3 | 3 | 2.382 | 12.00 | 3 |
|  | AT:WD vs. AT:INT | 14.03 | 7.885 | 6.144 | 3 | 3 | 6.283 | 12.00 | 3 |

| **Fig.** | **ANOVA table** | **SS (Type III)** | **DF** | **MS** | **F (DFn, DFd)** | **P value** |
| --- | --- | --- | --- | --- | --- | --- |
| Leptin - | Interaction | 13.07 | 2 | 6.534 | F (2, 13) = 0.1471 | 0.8646 |
| Males | **Trauma** | 86.32 | 1 | 86.32 | F (1, 13) = 1.943 | 0.1867 |
|  | **Diet** | 151.3 | 2 | 75.67 | F (2, 13) = 1.703 | 0.2203 |
|  | Residual | 577.5 | 13 | 44.42 |  |  |

**S Table 5. Top tertile contributors to PC1 and PC2 from whole-brain PCA of cDTI metrics.**

| Region (ROI) | PC1  Contribution | PC2 Contribution | Functional Domain |
| --- | --- | --- | --- |
| R_VMH | 0.017 | 0.020 | Hypothalamus (feeding/stress) |
| R_hypothalamic_region | 0.016 | 0.018 | Hypothalamus |
| R_thalamus | 0.016 | — | Thalamus |
| R_brainstem | 0.015 | — | Brainstem |
| L_brainstem | 0.015 | — | Brainstem |
| R_DMH | 0.015 | 0.008 | Hypothalamus |
| R_olfactory_bulb | 0.015 | 0.017 | Olfactory |
| L_pretectal_region | 0.015 | 0.022 | Midbrain sensory |
| R_striatum | 0.015 | — | Striatum (reward/motor) |
| L_olfactory_bulb | 0.014 | 0.012 | Olfactory |
| L_DMH | 0.014 | — | Hypothalamus |
| R_basal_forebrain_region | 0.014 | — | Basal forebrain |
| L_striatum | 0.014 | 0.005 | Striatum (reward/motor) |
| L_LHA | 0.014 | — | Hypothalamus |
| L_periaqueductal_gray | 0.014 | — | PAG (stress/emotion) |
| L_VMH | 0.013 | — | Hypothalamus |
| L_deeper_layers_superior_colliculus | 0.013 | 0.010 | Midbrain (visual/sensorimotor) |
| L_basal_forebrain_region | 0.013 | — | Basal forebrain |
| R_anterior_commissure_posterior | 0.013 | — | Commissural tract |
| L_thalamus | 0.013 | — | Thalamus |
| R_pretectal_region | 0.012 | 0.016 | Midbrain sensory |
| L_bed_nucleus_stria_terminalis (BNST) | 0.012 | 0.012 | Stress/reward integration |
| L_hypothalamic_region | 0.012 | — | Hypothalamus |
| R_periaqueductal_gray | 0.012 | 0.010 | PAG (stress/emotion) |
| L_presubiculum | 0.012 | — | Hippocampal/parahippocampal |
| L_fornix | 0.011 | 0.020 | Hippocampal efferent |
| R_stria_medullaris_thalamus | 0.011 | 0.005 | Thalamic tract |
| R_glomerular_layer_accessory_olfactory_bulb | 0.010 | — | Olfactory |
| R_bed_nucleus_stria_terminalis (BNST) | 0.010 | 0.010 | Stress/reward integration |
| L_interpeduncular_nucleus | 0.009 | — | Brainstem |
| L_supraoptic_decussation | 0.009 | — | Hypothalamic tract |
| L_medial_lemniscus | 0.009 | 0.024 | Brainstem sensory |
| L_anterior_commissure_posterior | 0.009 | 0.009 | Commissural tract |
| L_BLA (basolateral amygdala) | 0.009 | — | Amygdala |
| L_Ventral_CA3 | 0.009 | 0.010 | Hippocampus |
| L_nucleus_stria_medullaris | 0.009 | 0.008 | Thalamic tract |
| L_parasubiculum | 0.009 | 0.025 | Hippocampal/parahippocampal |
| R_VTA | 0.009 | — | Midbrain reward |
| L_periventricular_gray | 0.009 | — | PAG |
| L_subthalamic_nucleus | 0.009 | 0.011 | Basal ganglia |
| R_brachium_superior_colliculus | 0.009 | 0.005 | Midbrain visual tract |
| R_interpeduncular_nucleus | 0.009 | — | Brainstem |
| L_inferior_colliculus | 0.008 | — | Midbrain auditory |
| L_superficial_gray_superior_colliculus | 0.008 | 0.006 | Midbrain |
| L_stria_medullaris_thalamus | 0.008 | 0.005 | Thalamic tract |
| Infralimbic cortex | 0.008 | — | Prefrontal cortex |
| R_deeper_layers_superior_colliculus | 0.008 | 0.010 | Midbrain visual |
| R_septal_region | 0.008 | — | Septal (reward/motivation) |
| L_fimbria_hippocampus | 0.008 | 0.026 | Hippocampal efferent |
| L_VTA | 0.008 | — | Midbrain reward |
| L_septal_region | 0.008 | — | Septal |
| R_inferior_colliculus | 0.008 | — | Midbrain auditory |
| PVN | 0.007 | — | Hypothalamus (stress/feeding) |
| L_mammillothalamic_tract | 0.007 | 0.008 | Hypothalamic efferent |
| R_LHA | 0.007 | — | Hypothalamus |
| R_superficial_gray_superior_colliculus | 0.007 | 0.006 | Midbrain |
| R_periventricular_gray | 0.007 | 0.016 | PAG |
| L_globus_pallidus | 0.007 | 0.008 | Basal ganglia |
| R_commissure_inferior_colliculus | 0.007 | 0.032 | Commissural tract |
| R_BLA (basolateral amygdala) | 0.007 | — | Amygdala |
| L_stria_terminalis | 0.007 | 0.011 | Stress/reward pathway |
| R_medial_lemniscus | 0.007 | 0.007 | Brainstem sensory |
| L_posterior_commissure | 0.007 | — | Commissural tract |
| L_commissure_inferior_colliculus | 0.007 | 0.008 | Commissural tract |
| R_nucleus_stria_medullaris | 0.007 | 0.005 | Thalamic tract |
| L_inferior_cerebellar_peduncle | — | 0.081 | Cerebellum |
| R_inferior_olive | — | 0.051 | Brainstem |
| R_inferior_cerebellar_peduncle | — | 0.035 | Cerebellum |
| L_Ventral_CA2 | 0.003 | 0.033 | Hippocampus |
| L_inferior_olive | — | 0.029 | Brainstem |
| R_parasubiculum | 0.002 | 0.025 | Hippocampal/parahippocampal |
| L_middle_cerebellar_peduncle | — | 0.023 | Cerebellum |
| L_alveus_hippocampus | — | 0.016 | Hippocampal efferent |
| R_entopeduncular_nucleus | 0.004 | 0.015 | Basal ganglia |
| L_entopeduncular_nucleus | 0.005 | 0.015 | Basal ganglia |
| R_globus_pallidus | 0.003 | 0.014 | Basal ganglia |
| R_supraoptic_decussation | 0.001 | 0.013 | Hypothalamic tract |
| L_commissural_stria_terminalis | 0.003 | 0.011 | Stress/reward pathway |
| L_inner_ear | — | 0.016 | Auditory/vestibular |
| L_pineal_gland | — | 0.009 | Epithalamus |
| L_granule_cell_layer_cerebellum | — | 0.009 | Cerebellum |
| L_molecular_layer_cerebellum | — | 0.009 | Cerebellum |
| L_ventricular_system | — | 0.009 | CSF space |
| R_granule_cell_layer_cerebellum | — | 0.008 | Cerebellum |
| R_presubiculum | 0.005 | 0.008 | Hippocampal/parahippocampal |
| L_substantia_nigra | 0.003 | 0.007 | Midbrain reward |
| L_cornu_ammonis_2 (CA2) | 0.004 | 0.006 | Hippocampus |

**S Table 6. Functional clustering of top PCA contributors to brain structural integrity.**
Regions within the top tertile of loadings from PC1 and PC2 were grouped by functional system, and their contributions were summed to provide cumulative percentages. Hypothalamic nuclei accounted for the largest share (~18%), followed by brainstem/midbrain sensory (~15%) and reward/stress circuits (~14%). Hippocampal subfields and efferents (~12%), commissural tracts (~11%), and cerebellar regions (~9%) also contributed prominently. Together, these systems explain the majority of variance captured by PC1 and PC2 (~77.6%), highlighting distributed but coordinated alterations across stress, reward, memory, and sensorimotor networks in the AT + WD-INT model.

| **System** | **Key Regions**  **(examples)** | **Cumulative Contribution (%)** | **Notes** |
| --- | --- | --- | --- |
| **Hypothalamus** | VMH, DMH, LHA, PVN, mammillothalamic tract, hypothalamic region | **~18%** | Strongest and most consistent contributors across both PCs, reflecting stress–feeding integration |
| **Hippocampal network** | CA2, CA3, presubiculum, parasubiculum, alveus, fornix, fimbria | **~12%** | Repeatedly among top features, highlighting hippocampal–efferent remodeling |
| **Reward/Stress circuits** | Striatum, BNST, BLA, septal region, VTA, substantia nigra | **~14%** | Central in PC1 separation and PC2 variance; reflects binge–stress–reward pathways |
| **Brainstem/Midbrain sensory** | PAG, pretectal nuclei, superior/inferior colliculi, medial lemniscus | **~15%** | Represent sensory-emotional integration, especially visual and auditory relay circuits |
| **Cerebellum** | Inferior/middle cerebellar peduncles, granule & molecular layers | **~9%** | Emerged strongly in PC2, suggesting sensorimotor influences on feeding circuits |
| **Commissural/tracts** | Anterior commissure, posterior commissure, stria medullaris, supracommissural fibers | **~11%** | White matter hubs linking hemispheres and subcortical circuits |

**S Table 7. Tractography streamline counts across groups.** Quantification of tractography-derived streamlines revealed no significant group differences, indicating that the observed alterations in diffusion tensor imaging metrics likely reflect microstructural rather than gross connectivity changes.

|  | **Control** | | |  | **Trauma-induced bingeing** | | |
| --- | --- | --- | --- | --- | --- | --- | --- |
|  | **Mean** | **SEM** | **N** |  | **Mean** | **SEM** | **N** |
| Female | 729264 | 190372 | 4 |  | 567742 | 259906 | 4 |
| Male | 432860 | 281567 | 3 |  | 568545 | 201167 | 4 |

| **Fig.** | **ANOVA table** | **SS (Type III)** | **DF** | **MS** | **F (DFn, DFd)** | **P value** |
| --- | --- | --- | --- | --- | --- | --- |
| S Table 7 | Interaction | 80658416493 | 1 | 80658416493 | F (1, 11) = 0.4020 | 0.5390 |
|  | Sex | 81537505898 | 1 | 81537505898 | F (1, 11) = 0.4064 | 0.5368 |
|  | Treatment | 616224375 | 1 | 616224375 | F (1, 11) = 0.003072 | 0.9568 |
|  | Residual | 2206807683694 | 11 | 200618880336 |  |  |

**S Table 8.** Summary of statistics for **Supplemental Figure 1** - Trauma impact on behaviors.

| **Fig.** | **ANOVA table** | **SS (Type III)** | **DF** | **MS** | **F (DFn, DFd)** | **P value** |
| --- | --- | --- | --- | --- | --- | --- |
| S Fig 1A | Interaction | 0.0007329 | 1 | 0.0007329 | F (1, 86) = 0.07436 | 0.7857 |
|  | **Stress** | **0.04443** | **1** | **0.04443** | **F (1, 86) = 4.507** | **0.0366** |
|  | Diet | 0.01427 | 1 | 0.01427 | F (1, 86) = 1.448 | 0.2322 |
|  | Residual | 0.8476 | 86 | 0.009856 |  |  |

|  | **Mean 1** | **Mean 2** | **Mean diff.** | **N1** | **N2** | **q** | **DF** | **P value** |
| --- | --- | --- | --- | --- | --- | --- | --- | --- |
| Control:CD vs. Control:WD | 1641 | 1718 | -77.23 | 28 | 11 | 1.008 | 73.00 | 0.9998 |
| Control:CD vs. Trauma:CD | 1641 | 1703 | -62.12 | 28 | 26 | 1.060 | 73.00 | 0.5503 |
| Control:CD vs. Trauma:WD | 1641 | 1625 | 16.24 | 28 | 12 | 0.2186 | 73.00 | 0.2281 |
| Control:WD vs. Trauma:CD | 1718 | 1703 | 15.10 | 11 | 26 | 0.1951 | 73.00 | 0.8241 |
| Control:WD vs. Trauma:WD | 1718 | 1625 | 93.47 | 11 | 12 | 1.040 | 73.00 | 0.3648 |
| Trauma:CD vs. Trauma:WD | 1703 | 1625 | 78.36 | 26 | 12 | 1.043 | 73.00 | 0.0504 |

| **Fig.** | **ANOVA table** | **SS (Type III)** | **DF** | **MS** | **F (DFn, DFd)** | **P value** |
| --- | --- | --- | --- | --- | --- | --- |
| S Fig 1B | Interaction | 97451 | 1 | 97451 | F (1, 73) = 1.052 | 0.3085 |
|  | Stress | 3954 | 1 | 3954 | F (1, 73) = 0.04267 | 0.8369 |
|  | Diet | 5.179 | 1 | 5.179 | F (1, 73) = 5.588e-005 | 0.9941 |
|  | Residual | 6764918 | 73 | 92670 |  |  |
|  |  |  |  |  |  |  |

| **Fig.** | **ANOVA table** | **SS (Type III)** | **DF** | **MS** | **F (DFn, DFd)** | **P value** |
| --- | --- | --- | --- | --- | --- | --- |
| S Fig 1C | Interaction | 0.5554 | 1 | 0.5554 | F (1, 92) = 0.006690 | 0.9350 |
|  | Stress | 87.26 | 1 | 87.26 | F (1, 92) = 1.051 | 0.3079 |
|  | Diet | 21.25 | 1 | 21.25 | F (1, 92) = 0.2560 | 0.6141 |
|  | Residual | 7638 | 92 | 83.02 |  |  |

| **Fig.** | **ANOVA table** | **SS (Type III)** | **DF** | **MS** | **F (DFn, DFd)** | **P value** |
| --- | --- | --- | --- | --- | --- | --- |
| S Fig 1D | **Interaction** | **1386** | **1** | **1386** | **F (1, 90) = 4.309** | **0.0408** |
|  | Stress | 186.9 | 1 | 186.9 | F (1, 90) = 0.5811 | 0.4479 |
|  | Diet | 1250 | 1 | 1250 | F (1, 90) = 3.888 | 0.0517 |
|  | Residual | 28945 | 90 | 321.6 |  | 0.0408 |

|  | **Test details** | **Mean 1** | **Mean 2** | **Mean diff.** | **N1** | **N2** | **q** | **DF** | **P value** |
| --- | --- | --- | --- | --- | --- | --- | --- | --- | --- |
|  | Control:CD vs. Control:WD | 42.44 | 42.91 | -0.4740 | 50 | 12 | 0.1163 | 90.00 | 0.9998 |
|  | Control:CD vs. Trauma:CD | 42.44 | 48.42 | -5.982 | 50 | 23 | 1.872 | 90.00 | 0.5503 |
|  | Control:CD vs. Trauma:WD | 42.44 | 29.98 | 12.45 | 50 | 9 | 2.712 | 90.00 | 0.2281 |
|  | Control:WD vs. Trauma:CD | 42.91 | 48.42 | -5.508 | 12 | 23 | 1.220 | 90.00 | 0.8241 |
|  | Control:WD vs. Trauma:WD | 42.91 | 29.98 | 12.92 | 12 | 9 | 2.311 | 90.00 | 0.3648 |
|  | Trauma:CD vs. Trauma:WD | 48.42 | 29.98 | 18.43 | 23 | 9 | 3.697 | 90.00 | 0.0504 |

**S Table 9.** Summary of statistics for **Supplemental Figure 2** – Phenotypic z-score of naturalistic behaviors.

| **Fig.** | **ANOVA table** | **SS (Type III)** | **DF** | **MS** | **F (DFn, DFd)** | **P value** |
| --- | --- | --- | --- | --- | --- | --- |
| S Fig 2 - | **Interaction** | 0.3871 | 2 | 0.1936 | F (2, 37) = 0.7312 | 0.4881 |
| Phenotypic | Dietary Pattern | 0.7680 | 2 | 0.3840 | F (2, 37) = 1.451 | 0.2475 |
| Z-score | **Stress** | **1.375** | **1** | **1.375** | **F (1, 37) = 5.196** | **0.0285** |
|  | Residual | 9.794 | 37 | 0.2647 |  |  |

|  | **Test details** | **Mean 1** | **Mean 2** | **Mean diff.** | **N1** | **N2** | **q** | **DF** | **P value** |
| --- | --- | --- | --- | --- | --- | --- | --- | --- | --- |
|  | UNEXP |  |  |  |  |  |  |  |  |
|  | CD vs. WD | 0.3000 | 0.1450 | 0.1550 | 7 | 4 | 0.6797 | 37.00 | 0.8808 |
|  | CD vs. INT | 0.3000 | 0.001667 | 0.2983 | 7 | 6 | 1.474 | 37.00 | 0.5554 |
|  | WD vs. INT | 0.1450 | 0.001667 | 0.1433 | 4 | 6 | 0.6104 | 37.00 | 0.9027 |
|  |  |  |  |  |  |  |  |  |  |
|  | EXP |  |  |  |  |  |  |  |  |
|  | CD vs. WD | -0.01917 | -0.5186 | 0.4994 | 12 | 7 | 2.886 | 37.00 | 0.1166 |
|  | CD vs. INT | -0.01917 | -0.1457 | 0.1265 | 12 | 7 | 0.7314 | 37.00 | 0.8635 |
|  | WD vs. INT | -0.5186 | -0.1457 | -0.3729 | 7 | 7 | 1.917 | 37.00 | 0.3742 |

| **Fig.** | **ANOVA table** | **SS (Type III)** | **DF** | **MS** | **F (DFn, DFd)** | **P value** |
| --- | --- | --- | --- | --- | --- | --- |
| S Fig 2 - | **Interaction** | **7.892** | **2** | **3.946** | **F (2, 36) = 4.433** | **0.0190** |
| Drinking | Dietary Pattern | 1.718 | 2 | 0.8590 | F (2, 36) = 0.9649 | 0.3906 |
|  | Stress | 0.1169 | 1 | 0.1169 | F (1, 36) = 0.1313 | 0.7192 |
|  | Residual | 32.05 | 36 | 0.8902 |  |  |

| **Fig.** | **ANOVA table** | **SS (Type III)** | **DF** | **MS** | **F (DFn, DFd)** | **P value** |
| --- | --- | --- | --- | --- | --- | --- |
| S Fig 2 - | **Interaction** | **7.702** | **2** | **3.851** | **F (2, 38) = 4.519** | **0.0174** |
| Eating | Dietary Pattern | 3.183 | 2 | 1.592 | F (2, 38) = 1.868 | 0.1684 |
|  | Stress | 0.2937 | 1 | 0.2937 | F (1, 38) = 0.3446 | 0.5607 |
|  | Residual | 32.38 | 38 | 0.8521 |  |  |

| **Fig.** | **ANOVA table** | **SS (Type III)** | **DF** | **MS** | **F (DFn, DFd)** | **P value** |
| --- | --- | --- | --- | --- | --- | --- |
| S Fig 2 - | Interaction | 0.2224 | 2 | 0.1112 | F (2, 38) = 0.1104 | 0.8957 |
| Jumping | Dietary Pattern | 1.615 | 2 | 0.8074 | F (2, 38) = 0.8019 | 0.4559 |
|  | Stress | 2.371 | 1 | 2.371 | F (1, 38) = 2.355 | 0.1332 |
|  | Residual | 38.26 | 38 | 1.007 |  |  |

| **Fig.** | **ANOVA table** | **SS (Type III)** | **DF** | **MS** | **F (DFn, DFd)** | **P value** |
| --- | --- | --- | --- | --- | --- | --- |
| S Fig 2 - | Interaction | 3.015 | 2 | 1.507 | F (2, 39) = 1.846 | 0.1714 |
| Rearing | **Dietary Pattern** | **9.749** | **2** | **4.874** | **F (2, 39) = 5.968** | **0.0055** |
| Unsupported | Stress | 2.923 | 1 | 2.923 | F (1, 39) = 3.579 | 0.0660 |
|  | Residual | 31.85 | 39 | 0.8167 |  |  |

| **Fig.** | **ANOVA table** | **SS (Type III)** | **DF** | **MS** | **F (DFn, DFd)** | **P value** |
| --- | --- | --- | --- | --- | --- | --- |
| S Fig 2 - | Interaction | 0.1818 | 2 | 0.09088 | F (2, 39) = 0.08136 | 0.9220 |
| Rearing | Dietary Pattern | 0.2960 | 2 | 0.1480 | F (2, 39) = 0.1325 | 0.8763 |
| Supported | Stress | 0.1031 | 1 | 0.1031 | F (1, 39) = 0.09226 | 0.7629 |
|  | Residual | 43.56 | 39 | 1.117 |  |  |

| **Fig.** | **ANOVA table** | **SS (Type III)** | **DF** | **MS** | **F (DFn, DFd)** | **P value** |
| --- | --- | --- | --- | --- | --- | --- |
| S Fig 2 | Interaction | 0.9302 | 2 | 0.4651 | F (2, 39) = 0.4380 | 0.6485 |
| Resting | Dietary Pattern | 1.510 | 2 | 0.7552 | F (2, 39) = 0.7111 | 0.4973 |
|  | Stress | 0.2617 | 1 | 0.2617 | F (1, 39) = 0.2464 | 0.6224 |
|  | Residual | 41.42 | 39 | 1.062 |  |  |

| **Fig.** | **ANOVA table** | **SS (Type III)** | **DF** | **MS** | **F (DFn, DFd)** | **P value** |
| --- | --- | --- | --- | --- | --- | --- |
| S Fig 2 - | Interaction | 1.229 | 2 | 0.6144 | F (2, 39) = 0.5784 | 0.5655 |
| Sniffing | Dietary Pattern | 0.5777 | 2 | 0.2889 | F (2, 39) = 0.2719 | 0.7633 |
|  | Stress | 0.5219 | 1 | 0.5219 | F (1, 39) = 0.4913 | 0.4875 |
|  | Residual | 41.43 | 39 | 1.062 |  |  |

| **Fig.** | **ANOVA table** | **SS (Type III)** | **DF** | **MS** | **F (DFn, DFd)** | **P value** |
| --- | --- | --- | --- | --- | --- | --- |
| S Fig 2 - | Interaction | 0.3184 | 2 | 0.1592 | F (2, 39) = 0.1936 | 0.8248 |
| Twitching | **Dietary Pattern** | **9.263** | **2** | **4.631** | **F (2, 39) = 5.632** | **0.0071** |
|  | Stress | 1.792 | 1 | 1.792 | F (1, 39) = 2.179 | 0.1480 |
|  | Residual | 32.07 | 39 | 0.8223 |  |  |

| **Fig.** | **ANOVA table** | **SS (Type III)** | **DF** | **MS** | **F (DFn, DFd)** | **P value** |
| --- | --- | --- | --- | --- | --- | --- |
| S Fig 2 – | Interaction | 0.5102 | 2 | 0.2551 | F (2, 39) = 0.3480 | 0.7083 |
| Grooming | **Dietary Pattern** | **15.47** | **2** | **7.736** | **F (2, 39) = 10.55** | **0.0002** |
|  | Stress | 0.1991 | 1 | 0.1991 | F (1, 39) = 0.2716 | 0.6052 |
|  | Residual | 28.59 | 39 | 0.7331 |  |  |

| **Fig.** | **ANOVA table** | **SS (Type III)** | **DF** | **MS** | **F (DFn, DFd)** | **P value** |
| --- | --- | --- | --- | --- | --- | --- |
| S Fig 2 – | Interaction | 80.71 | 21 | 3.843 | F (21, 286) = 1.061 | 0.3906 |
| Walking | Dietary Pattern | 80.71 | 21 | 3.843 | F (21, 286) = 1.061 | 0.3906 |
|  | Stress | 0.1935 | 1 | 0.1935 | F (1, 286) = 0.05341 | 0.8174 |
|  | Residual | 1036 | 286 | 3.623 |  |  |

| **Fig.** | **ANOVA table** | **SS (Type III)** | **DF** | **MS** | **F (DFn, DFd)** | **P value** |
| --- | --- | --- | --- | --- | --- | --- |
| S Fig 2 – | Interaction | 0.5201 | 2 | 0.2600 | F (2, 39) = 0.2610 | 0.7716 |
| Bean Break | Dietary Pattern | 4.878 | 2 | 2.439 | F (2, 39) = 2.448 | 0.0996 |
|  | Stress | 1.586 | 1 | 1.586 | F (1, 39) = 1.592 | 0.2146 |
|  | Residual | 38.85 | 39 | 0.9962 |  |  |

| **Fig.** | **ANOVA table** | **SS (Type III)** | **DF** | **MS** | **F (DFn, DFd)** | **P value** |
| --- | --- | --- | --- | --- | --- | --- |
| S Fig 2 – | Interaction | 0.7086 | 2 | 0.3543 | F (2, 39) = 0.4050 | 0.6697 |
| Distance | **Dietary Pattern** | **7.822** | **2** | **3.911** | **F (2, 39) = 4.471** | **0.0179** |
|  | Stress | 0.7759 | 1 | 0.7759 | F (1, 39) = 0.8870 | 0.3521 |
|  | Residual | 34.12 | 39 | 0.8748 |  |  |

**S Table 10.** Summary of statistics for **Supplemental Figure 3** - Z-scored neuroimaging metrics for hippocampal subfields and hypothalamic nuclei

| **Fig.** | **ANOVA table** | **SS (Type III)** | **DF** | **MS** | **F (DFn, DFd)** | **P value** |
| --- | --- | --- | --- | --- | --- | --- |
| S Fig 3A | Interaction | 80.71 | 21 | 3.843 | F (21, 286) = 1.061 | 0.3906 |
|  | **Stress** | 80.71 | 21 | 3.843 | F (21, 286) = 1.061 | 0.3906 |
|  | Diet | 0.1935 | 1 | 0.1935 | F (1, 286) = 0.05341 | 0.8174 |
|  | Residual | 1036 | 286 | 3.623 |  |  |

| **Fig.** | **ANOVA table** | **SS (Type III)** | **DF** | **MS** | **F (DFn, DFd)** | **P value** |
| --- | --- | --- | --- | --- | --- | --- |
| S Fig 3B | Interaction | 4.931 | 21 | 0.2348 | F (21, 286) = 0.1384 | >0.9999 |
|  | Stress | 4.931 | 21 | 0.2348 | F (21, 286) = 0.1384 | >0.9999 |
|  | **Diet** | **8.081** | **1** | **8.081** | **F (1, 286) = 4.764** | **0.0299** |
|  | Residual | 485.1 | 286 | 1.696 |  |  |

|  | **Test details** | **Mean 1** | **Mean 2** | **Mean diff.** | **N1** | **N2** | **q** | **DF** | **P value** |
| --- | --- | --- | --- | --- | --- | --- | --- | --- | --- |
|  | Control - Trauma-Induced Bingeing |  |  |  |  |  |  |  |  |
|  | L_Dorsal_CA3 | -1.429E-10 | -0.3863 | 0.3863 | 0.6740 | 7 | 8 | 0.5731 | >0.9999 |
|  | R_Dorsal_CA3 | -8.327E-17 | -0.3728 | 0.3728 | 0.6740 | 7 | 8 | 0.5531 | >0.9999 |
|  | L_Dorsal_CA2 | 0.000 | -0.3066 | 0.3066 | 0.6740 | 7 | 8 | 0.4548 | >0.9999 |
|  | R_Dorsal_CA2 | -2.857E-10 | -0.4129 | 0.4129 | 0.6740 | 7 | 8 | 0.6126 | >0.9999 |
|  | L_Dorsal_CA1 | 1.429E-10 | -0.5510 | 0.5510 | 0.6740 | 7 | 8 | 0.8175 | >0.9999 |
|  | R_Dorsal_CA1 | 2.220E-16 | -0.6401 | 0.6401 | 0.6740 | 7 | 8 | 0.9497 | >0.9999 |
|  | L_Ventral_CA3 | 0.000 | -0.4222 | 0.4222 | 0.6740 | 7 | 8 | 0.6263 | >0.9999 |
|  | R_Ventral_CA3 | 0.000 | -0.2728 | 0.2728 | 0.6740 | 7 | 8 | 0.4048 | >0.9999 |
|  | L_Ventral_CA2 | -1.665E-16 | 0.1061 | -0.1061 | 0.6740 | 7 | 8 | 0.1574 | >0.9999 |
|  | R_Ventral_CA2 | -8.327E-17 | -0.4437 | 0.4437 | 0.6740 | 7 | 8 | 0.6582 | >0.9999 |
|  | L_Ventral_CA1 | 2.857E-10 | -0.4708 | 0.4708 | 0.6740 | 7 | 8 | 0.6984 | >0.9999 |
|  | R_Ventral_CA1 | 1.429E-10 | -0.8095 | 0.8095 | 0.6740 | 7 | 8 | 1.201 | 0.9969 |
|  | L_DG | 1.429E-10 | -0.5558 | 0.5558 | 0.6740 | 7 | 8 | 0.8245 | >0.9999 |
|  | R_DG | -1.429E-10 | -0.2562 | 0.2562 | 0.6740 | 7 | 8 | 0.3801 | >0.9999 |
|  | L_VMH | -1.665E-16 | -0.1200 | 0.1200 | 0.6740 | 7 | 8 | 0.1780 | >0.9999 |
|  | R_VMH | -1.110E-16 | -0.08583 | 0.08583 | 0.6740 | 7 | 8 | 0.1273 | >0.9999 |
|  | L_LHA | 1.110E-16 | -0.5307 | 0.5307 | 0.6740 | 7 | 8 | 0.7873 | >0.9999 |
|  | R_LHA | -1.429E-10 | -0.1922 | 0.1922 | 0.6740 | 7 | 8 | 0.2852 | >0.9999 |
|  | L_DMH | -8.327E-17 | -0.1939 | 0.1939 | 0.6740 | 7 | 8 | 0.2877 | >0.9999 |
|  | R_DMH | -8.327E-17 | -0.1662 | 0.1662 | 0.6740 | 7 | 8 | 0.2466 | >0.9999 |
|  | PVN | -1.110E-16 | -0.1149 | 0.1149 | 0.6740 | 7 | 8 | 0.1704 | >0.9999 |
|  | AN | -1.429E-10 | 0.2973 | -0.2973 | 0.6740 | 7 | 8 | 0.4411 | >0.9999 |

| **Fig.** | **ANOVA table** | **SS (Type III)** | **DF** | **MS** | **F (DFn, DFd)** | **P value** |
| --- | --- | --- | --- | --- | --- | --- |
| S Fig 3C | Interaction | 8.413 | 21 | 0.4006 | F (21, 251) = 0.1792 | >0.9999 |
|  | Stress | 8.413 | 21 | 0.4006 | F (21, 251) = 0.1792 | >0.9999 |
|  | **Diet** | **24.57** | **1** | **24.57** | **F (1, 251) = 10.99** | **0.0010** |
|  | Residual | 561.0 | 251 | 2.235 |  |  |

|  | **Test details** | **Mean 1** | **Mean 2** | **Mean diff.** | **N1** | **N2** | **q** | **DF** | **P value** |
| --- | --- | --- | --- | --- | --- | --- | --- | --- | --- |
|  | Control - Trauma-Induced Bingeing |  |  |  |  |  |  |  |  |
|  | L_Dorsal_CA3 | 0.000 | -1.503 | 1.503 | 4 | 4 | 1.422 | 251.0 | 0.9762 |
|  | R_Dorsal_CA3 | -1.110E-16 | -0.4518 | 0.4518 | 7 | 8 | 0.5838 | 251.0 | >0.9999 |
|  | L_Dorsal_CA2 | -4.441E-16 | -1.297 | 1.297 | 4 | 4 | 1.227 | 251.0 | 0.9959 |
|  | R_Dorsal_CA2 | -1.110E-16 | -0.6172 | 0.6172 | 7 | 8 | 0.7976 | 251.0 | >0.9999 |
|  | L_Dorsal_CA1 | -2.220E-16 | -1.361 | 1.361 | 4 | 4 | 1.288 | 251.0 | 0.9924 |
|  | R_Dorsal_CA1 | 0.000 | -0.6932 | 0.6932 | 7 | 8 | 0.8959 | 251.0 | >0.9999 |
|  | L_Ventral_CA3 | -1.110E-16 | -0.5245 | 0.5245 | 7 | 8 | 0.6779 | 251.0 | >0.9999 |
|  | R_Ventral_CA3 | -1.665E-16 | -0.4528 | 0.4528 | 7 | 8 | 0.5853 | 251.0 | >0.9999 |
|  | L_Ventral_CA2 | -5.551E-16 | 0.1563 | -0.1563 | 7 | 8 | 0.2020 | 251.0 | >0.9999 |
|  | R_Ventral_CA2 | -1.110E-16 | -0.4795 | 0.4795 | 7 | 8 | 0.6197 | 251.0 | >0.9999 |
|  | L_Ventral_CA1 | -1.110E-16 | -0.4562 | 0.4562 | 7 | 8 | 0.5896 | 251.0 | >0.9999 |
|  | R_Ventral_CA1 | 0.000 | -0.7972 | 0.7972 | 7 | 8 | 1.030 | 251.0 | 0.9997 |
|  | L_DG | -1.110E-16 | -0.6630 | 0.6630 | 7 | 8 | 0.8568 | 251.0 | >0.9999 |
|  | R_DG | -1.665E-16 | -0.2449 | 0.2449 | 7 | 8 | 0.3165 | 251.0 | >0.9999 |
|  | L_VMH | -1.429E-10 | -0.3044 | 0.3044 | 7 | 8 | 0.3934 | 251.0 | >0.9999 |
|  | R_VMH | 0.000 | -0.3933 | 0.3933 | 7 | 8 | 0.5082 | 251.0 | >0.9999 |
|  | L_LHA | -1.665E-16 | -0.8709 | 0.8709 | 7 | 8 | 1.126 | 251.0 | 0.9987 |
|  | R_LHA | -1.429E-10 | -0.5221 | 0.5221 | 7 | 8 | 0.6748 | 251.0 | >0.9999 |
|  | L_DMH | 1.429E-10 | -0.3296 | 0.3296 | 7 | 8 | 0.4260 | 251.0 | >0.9999 |
|  | R_DMH | -1.429E-10 | -0.3455 | 0.3455 | 7 | 8 | 0.4465 | 251.0 | >0.9999 |
|  | PVN | -2.500E-10 | -0.8266 | 0.8266 | 4 | 4 | 0.7819 | 251.0 | >0.9999 |
|  | AN | 0.000 | -0.1865 | 0.1865 | 4 | 4 | 0.1764 | 251.0 | >0.9999 |

| **Fig.** | **ANOVA table** | **SS (Type III)** | **DF** | **MS** | **F (DFn, DFd)** | **P value** |
| --- | --- | --- | --- | --- | --- | --- |
| S Fig 3D | Interaction | 8.076 | 21 | 0.3846 | F (21, 286) = 0.2261 | 0.9999 |
|  | Stress | 8.076 | 21 | 0.3846 | F (21, 286) = 0.2261 | 0.9999 |
|  | Diet | 4.135 | 1 | 4.135 | F (1, 286) = 2.430 | 0.1201 |
|  | Residual | 486.5 | 286 | 1.701 |  |  |

**S Table 11.** Summary of statistics for **Supplemental Figure 4** – Weekly Consumption.

| **Fig.** | **ANOVA table** | **SS (Type III)** | **DF** | **MS** | **F (DFn, DFd)** | **P value** |
| --- | --- | --- | --- | --- | --- | --- |
| S Fig 4A | **Interaction** | **0.04337** | **2** | **0.02169** | **F (2, 72) = 9.098** | **0.0003** |
|  | **Stress** | **0.02132** | **1** | **0.02132** | **F (1, 72) = 8.943** | **0.0038** |
|  | **Diet** | **0.01905** | **2** | **0.009526** | **F (2, 72) = 3.996** | **0.0226** |
|  | Residual | 0.1716 | 72 | 0.002384 |  |  |

|  | **Test details** | **Mean 1** | **Mean 2** | **Mean diff.** | **N1** | **N2** | **q** | **DF** | **P value** |
| --- | --- | --- | --- | --- | --- | --- | --- | --- | --- |
|  | **Control:CD vs. Control:WD** | **0.2924** | **0.3541** | **-0.06171** | **13** | **12** | **4.465** | **72.00** | **0.0271** |
|  | Control:CD vs. Control:INT | 0.2924 | 0.3208 | -0.02844 | 13 | 15 | 2.174 | 72.00 | 0.6416 |
|  | **Control:CD vs. Trauma:CD** | **0.2924** | **0.3926** | **-0.1002** | **13** | **12** | **7.249** | **72.00** | **<0.0001** |
|  | **Control:CD vs. Trauma:WD** | **0.2924** | **0.3578** | **-0.06541** | **13** | **12** | **4.733** | **72.00** | **0.0158** |
|  | Control:CD vs. Trauma:INT | 0.2924 | 0.3165 | -0.02412 | 13 | 14 | 1.814 | 72.00 | 0.7936 |
|  | Control:WD vs. Control:INT | 0.3541 | 0.3208 | 0.03327 | 12 | 15 | 2.488 | 72.00 | 0.4982 |
|  | Control:WD vs. Trauma:CD | 0.3541 | 0.3926 | -0.03848 | 12 | 12 | 2.730 | 72.00 | 0.3923 |
|  | Control:WD vs. Trauma:WD | 0.3541 | 0.3578 | -0.003700 | 12 | 12 | 0.2625 | 72.00 | >0.9999 |
|  | Control:WD vs. Trauma:INT | 0.3541 | 0.3165 | 0.03759 | 12 | 14 | 2.768 | 72.00 | 0.3769 |
|  | **Control:INT vs. Trauma:CD** | **0.3208** | **0.3926** | **-0.07175** | **15** | **12** | **5.366** | **72.00** | **0.0040** |
|  | Control:INT vs. Trauma:WD | 0.3208 | 0.3578 | -0.03697 | 15 | 12 | 2.765 | 72.00 | 0.3782 |
|  | Control:INT vs. Trauma:INT | 0.3208 | 0.3165 | 0.004327 | 15 | 14 | 0.3372 | 72.00 | 0.9999 |
|  | Trauma:CD vs. Trauma:WD | 0.3926 | 0.3578 | 0.03478 | 12 | 12 | 2.468 | 72.00 | 0.5072 |
|  | **Trauma:CD vs. Trauma:INT** | **0.3926** | **0.3165** | **0.07607** | **12** | **14** | **5.601** | **72.00** | **0.0023** |
|  | Trauma:WD vs. Trauma:INT | 0.3578 | 0.3165 | 0.04129 | 12 | 14 | 3.040 | 72.00 | 0.2742 |

| **Fig.** | **ANOVA table** | **SS (Type III)** | **DF** | **MS** | **F (DFn, DFd)** | **P value** |
| --- | --- | --- | --- | --- | --- | --- |
| S Fig 4B | **Interaction** | **0.01734** | **2** | **0.008669** | **F (2, 72) = 3.206** | **0.0464** |
|  | **Stress** | **0.02236** | **1** | **0.02236** | **F (1, 72) = 8.269** | **0.0053** |
|  | **Diet** | **0.03340** | **2** | **0.01670** | **F (2, 72) = 6.175** | **0.0033** |
|  | Residual | 0.1947 | 72 | 0.002704 |  |  |

|  | **Test details** | **Mean 1** | **Mean 2** | **Mean diff.** | **N1** | **N2** | **q** | **DF** | **P value** |
| --- | --- | --- | --- | --- | --- | --- | --- | --- | --- |
|  | **Control:CD vs. Control:WD** | **0.2453** | **0.3168** | **-0.07140** | **13** | **12** | **4.851** | **72.00** | **0.0124** |
|  | **Control:CD vs. Control:INT** | **0.2453** | **0.3038** | **-0.05842** | **13** | **15** | **4.193** | **72.00** | **0.0455** |
|  | **Control:CD vs. Trauma:CD** | **0.2453** | **0.3162** | **-0.07083** | **13** | **12** | **4.811** | **72.00** | **0.0134** |
|  | **Control:CD vs. Trauma:WD** | **0.2453** | **0.3490** | **-0.1036** | **13** | **12** | **7.041** | **72.00** | **<0.0001** |
|  | Control:CD vs. Trauma:INT | 0.2453 | 0.3027 | -0.05733 | 13 | 14 | 4.047 | 72.00 | 0.0591 |
|  | Control:WD vs. Control:INT | 0.3168 | 0.3038 | 0.01298 | 12 | 15 | 0.9116 | 72.00 | 0.9871 |
|  | Control:WD vs. Trauma:CD | 0.3168 | 0.3162 | 0.0005750 | 12 | 12 | 0.0383 | 72.00 | >0.9999 |
|  | Control:WD vs. Trauma:WD | 0.3168 | 0.3490 | -0.03224 | 12 | 12 | 2.148 | 72.00 | 0.6536 |
|  | Control:WD vs. Trauma:INT | 0.3168 | 0.3027 | 0.01408 | 12 | 14 | 0.9732 | 72.00 | 0.9827 |
|  | Control:INT vs. Trauma:CD | 0.3038 | 0.3162 | -0.01241 | 15 | 12 | 0.8713 | 72.00 | 0.9895 |
|  | Control:INT vs. Trauma:WD | 0.3038 | 0.3490 | -0.04523 | 15 | 12 | 3.175 | 72.00 | 0.2304 |
|  | Control:INT vs. Trauma:INT | 0.3038 | 0.3027 | 0.001095 | 15 | 14 | 0.0802 | 72.00 | >0.9999 |
|  | Trauma:CD vs. Trauma:WD | 0.3162 | 0.3490 | -0.03282 | 12 | 12 | 2.186 | 72.00 | 0.6363 |
|  | Trauma:CD vs. Trauma:INT | 0.3162 | 0.3027 | 0.01350 | 12 | 14 | 0.9335 | 72.00 | 0.9857 |
|  | Trauma:WD vs. Trauma:INT | 0.3490 | 0.3027 | 0.04632 | 12 | 14 | 3.202 | 72.00 | 0.2224 |
|  |  |  |  |  |  |  |  |  |  |

| **Fig.** | **ANOVA table** | **SS (Type III)** | **DF** | **MS** | **F (DFn, DFd)** | **P value** |
| --- | --- | --- | --- | --- | --- | --- |
| S Fig 4C | **Interaction** | **0.03520** | **2** | **0.01760** | **F (2, 72) = 7.000** | **0.0017** |
|  | **Stress** | **0.01174** | **1** | **0.01174** | **F (1, 72) = 4.671** | **0.0340** |
|  | **Diet** | **0.02218** | **2** | **0.01109** | **F (2, 72) = 4.411** | **0.0156** |
|  | Residual | 0.1810 | 72 | 0.002514 |  |  |

|  | **Test details** | **Mean 1** | **Mean 2** | **Mean diff.** | **N1** | **N2** | **q** | **DF** | **P value** |
| --- | --- | --- | --- | --- | --- | --- | --- | --- | --- |
|  | **Control:CD vs. Control:WD** | **0.2759** | **0.3407** | **-0.06476** | **13** | **12** | **4.563** | **72.00** | **0.0223** |
|  | Control:CD vs. Control:INT | 0.2759 | 0.2953 | -0.01942 | 13 | 15 | 1.446 | 72.00 | 0.9090 |
|  | **Control:CD vs. Trauma:CD** | **0.2759** | **0.3613** | **-0.08541** | **13** | **12** | **6.018** | **72.00** | **0.0009** |
|  | Control:CD vs. Trauma:WD | 0.2759 | 0.3302 | -0.05432 | 13 | 12 | 3.827 | 72.00 | 0.0865 |
|  | Control:CD vs. Trauma:INT | 0.2759 | 0.2943 | -0.01836 | 13 | 14 | 1.344 | 72.00 | 0.9317 |
|  | Control:WD vs. Control:INT | 0.3407 | 0.2953 | 0.04534 | 12 | 15 | 3.302 | 72.00 | 0.1940 |
|  | Control:WD vs. Trauma:CD | 0.3407 | 0.3613 | -0.02065 | 12 | 12 | 1.427 | 72.00 | 0.9136 |
|  | Control:WD vs. Trauma:WD | 0.3407 | 0.3302 | 0.01044 | 12 | 12 | 0.7214 | 72.00 | 0.9956 |
|  | Control:WD vs. Trauma:INT | 0.3407 | 0.2943 | 0.04640 | 12 | 14 | 3.327 | 72.00 | 0.1872 |
|  | **Control:INT vs. Trauma:CD** | **0.2953** | **0.3613** | **-0.06599** | **15** | **12** | **4.805** | **72.00** | **0.0136** |
|  | Control:INT vs. Trauma:WD | 0.2953 | 0.3302 | -0.03489 | 15 | 12 | 2.541 | 72.00 | 0.4743 |
|  | Control:INT vs. Trauma:INT | 0.2953 | 0.2943 | 0.001069 | 15 | 14 | 0.0811 | 72.00 | >0.9999 |
|  | Trauma:CD vs. Trauma:WD | 0.3613 | 0.3302 | 0.03109 | 12 | 12 | 2.148 | 72.00 | 0.6534 |
|  | **Trauma:CD vs. Trauma:INT** | **0.3613** | **0.2943** | **0.06705** | **12** | **14** | **4.807** | **72.00** | **0.0136** |
|  | Trauma:WD vs. Trauma:INT | 0.3302 | 0.2943 | 0.03596 | 12 | 14 | 2.578 | 72.00 | 0.4577 |

| **Fig.** | **ANOVA table** | **SS (Type III)** | **DF** | **MS** | **F (DFn, DFd)** | **P value** |
| --- | --- | --- | --- | --- | --- | --- |
| S Fig 4D | **Interaction** | **0.04294** | **2** | **0.02147** | **F (2, 72) = 9.540** | **0.0002** |
|  | **Stress** | **0.01285** | **1** | **0.01285** | **F (1, 72) = 5.709** | **0.0195** |
|  | **Diet** | **0.03487** | **2** | **0.01743** | **F (2, 72) = 7.748** | **0.0009** |
|  | Residual | 0.1620 | 72 | 0.002250 |  |  |

|  | **Test details** | **Mean 1** | **Mean 2** | **Mean diff.** | **N1** | **N2** | **q** | **DF** | **P value** |
| --- | --- | --- | --- | --- | --- | --- | --- | --- | --- |
|  | Control:CD vs. Control:WD | 0.2720 | 0.3228 | -0.05083 | 13 | 12 | 3.785 | 72.00 | 0.0926 |
|  | Control:CD vs. Control:INT | 0.2720 | 0.3735 | -0.1015 | 13 | 15 | 7.986 | 72.00 | <0.0001 |
|  | Control:CD vs. Trauma:CD | 0.2720 | 0.3628 | -0.09082 | 13 | 12 | 6.764 | 72.00 | 0.0001 |
|  | Control:CD vs. Trauma:WD | 0.2720 | 0.3273 | -0.05533 | 13 | 12 | 4.121 | 72.00 | 0.0518 |
|  | Control:CD vs. Trauma:INT | 0.2720 | 0.3554 | -0.08347 | 13 | 14 | 6.461 | 72.00 | 0.0003 |
|  | Control:WD vs. Control:INT | 0.3228 | 0.3735 | -0.05067 | 12 | 15 | 3.901 | 72.00 | 0.0763 |
|  | Control:WD vs. Trauma:CD | 0.3228 | 0.3628 | -0.03999 | 12 | 12 | 2.920 | 72.00 | 0.3171 |
|  | Control:WD vs. Trauma:WD | 0.3228 | 0.3273 | -0.004500 | 12 | 12 | 0.3286 | 72.00 | >0.9999 |
|  | Control:WD vs. Trauma:INT | 0.3228 | 0.3554 | -0.03264 | 12 | 14 | 2.474 | 72.00 | 0.5046 |
|  | Control:INT vs. Trauma:CD | 0.3735 | 0.3628 | 0.01068 | 15 | 12 | 0.8222 | 72.00 | 0.9920 |
|  | Control:INT vs. Trauma:WD | 0.3735 | 0.3273 | 0.04617 | 15 | 12 | 3.554 | 72.00 | 0.1339 |
|  | Control:INT vs. Trauma:INT | 0.3735 | 0.3554 | 0.01803 | 15 | 14 | 1.447 | 72.00 | 0.9088 |
|  | Trauma:CD vs. Trauma:WD | 0.3628 | 0.3273 | 0.03549 | 12 | 12 | 2.592 | 72.00 | 0.4518 |
|  | Trauma:CD vs. Trauma:INT | 0.3628 | 0.3554 | 0.007349 | 12 | 14 | 0.5569 | 72.00 | 0.9987 |
|  | Trauma:WD vs. Trauma:INT | 0.3273 | 0.3554 | -0.02814 | 12 | 14 | 2.133 | 72.00 | 0.6603 |

**S Table 12.** Summary of statistics for **Supplemental Figure 5** – Longitudinal weight-normalized food intake.

| **Fig.** | **ANOVA table** | **SS (Type III)** | **DF** | **MS** | **F (DFn, DFd)** | **P value** |
| --- | --- | --- | --- | --- | --- | --- |
| S Fig 5A - | **Interaction** | **0.04337** | **2** | **0.02169** | **F (2, 72) = 9.098** | **0.0003** |
| Females | **Stress** | **0.02132** | **1** | **0.02132** | **F (1, 72) = 8.943** | **0.0038** |
|  | **Diet** | **0.01905** | **2** | **0.009526** | **F (2, 72) = 3.996** | **0.0226** |
|  | Residual | 0.1716 | 72 | 0.002384 |  |  |

|  | **Test details** | **Mean 1** | **Mean 2** | **Mean diff.** | **N1** | **N2** | **q** | **DF** | **P value** |
| --- | --- | --- | --- | --- | --- | --- | --- | --- | --- |
|  | **Week 1** |  |  |  |  |  |  |  |  |
|  | CD - Control vs. CD - AT | 0.6514 | 0.7169 | -0.06548 | 7 | 6 | 3.116 | 420.0 | 0.2382 |
|  | CD - Control vs. WD - Control | 0.6514 | 0.6538 | -0.002379 | 7 | 6 | 0.1132 | 420.0 | >0.9999 |
|  | **CD - Control vs. WD - AT** | **0.6514** | **0.7432** | **-0.09180** | **7** | **6** | **4.369** | **420.0** | **0.0259** |
|  | CD - Control vs. INT - Control | 0.6514 | 0.6906 | -0.03927 | 7 | 8 | 2.009 | 420.0 | 0.7145 |
|  | CD - Control vs. INT - AT | 0.6514 | 0.6820 | -0.03060 | 7 | 8 | 1.566 | 420.0 | 0.8783 |
|  | CD - AT vs. WD - Control | 0.7169 | 0.6538 | 0.06310 | 6 | 6 | 2.894 | 420.0 | 0.3180 |
|  | CD - AT vs. WD - AT | 0.7169 | 0.7432 | -0.02632 | 6 | 6 | 1.207 | 420.0 | 0.9571 |
|  | CD - AT vs. INT - Control | 0.7169 | 0.6906 | 0.02621 | 6 | 8 | 1.285 | 420.0 | 0.9442 |
|  | CD - AT vs. INT - AT | 0.7169 | 0.6820 | 0.03488 | 6 | 8 | 1.710 | 420.0 | 0.8324 |
|  | **WD - Control vs. WD - AT** | **0.6538** | **0.7432** | **-0.08942** | **6** | **6** | **4.101** | **420.0** | **0.0451** |
|  | WD - Control vs. INT - Control | 0.6538 | 0.6906 | -0.03689 | 6 | 8 | 1.809 | 420.0 | 0.7965 |
|  | WD - Control vs. INT - AT | 0.6538 | 0.6820 | -0.02822 | 6 | 8 | 1.384 | 420.0 | 0.9246 |
|  | WD - AT vs. INT - Control | 0.7432 | 0.6906 | 0.05253 | 6 | 8 | 2.575 | 420.0 | 0.4532 |
|  | WD - AT vs. INT - AT | 0.7432 | 0.6820 | 0.06119 | 6 | 8 | 3.000 | 420.0 | 0.2782 |
|  | INT - Control vs. INT - AT | 0.6906 | 0.6820 | 0.008663 | 8 | 8 | 0.4587 | 420.0 | 0.9995 |
|  |  |  |  |  |  |  |  |  |  |
|  | **Week 2** |  |  |  |  |  |  |  |  |
|  | **CD - Control vs. CD - AT** | **0.4201** | **0.7986** | **-0.3785** | **7** | **6** | **18.02** | **420.0** | **<0.0001** |
|  | **CD - Control vs. WD - Control** | **0.4201** | **0.5521** | **-0.1320** | **7** | **6** | **6.283** | **420.0** | **0.0002** |
|  | **CD - Control vs. WD - AT** | **0.4201** | **0.9044** | **-0.4843** | **7** | **6** | **23.05** | **420.0** | **<0.0001** |
|  | **CD - Control vs. INT - Control** | **0.4201** | **0.5170** | **-0.09685** | **7** | **8** | **4.955** | **420.0** | **0.0067** |
|  | **CD - Control vs. INT - AT** | **0.4201** | **0.5310** | **-0.1109** | **7** | **8** | **5.675** | **420.0** | **0.0010** |
|  | **CD - AT vs. WD - Control** | **0.7986** | **0.5521** | **0.2465** | **6** | **6** | **11.31** | **420.0** | **<0.0001** |
|  | **CD - AT vs. WD - AT** | **0.7986** | **0.9044** | **-0.1058** | **6** | **6** | **4.851** | **420.0** | **0.0086** |
|  | **CD - AT vs. INT - Control** | **0.7986** | **0.5170** | **0.2817** | **6** | **8** | **13.81** | **420.0** | **<0.0001** |
|  | **CD - AT vs. INT - AT** | **0.7986** | **0.5310** | **0.2676** | **6** | **8** | **13.12** | **420.0** | **<0.0001** |
|  | **WD - Control vs. WD - AT** | **0.5521** | **0.9044** | **-0.3523** | **6** | **6** | **16.16** | **420.0** | **<0.0001** |
|  | WD - Control vs. INT - Control | 0.5521 | 0.5170 | 0.03515 | 6 | 8 | 1.724 | 420.0 | 0.8276 |
|  | WD - Control vs. INT - AT | 0.5521 | 0.5310 | 0.02108 | 6 | 8 | 1.033 | 420.0 | 0.9781 |
|  | **WD - AT vs. INT - Control** | **0.9044** | **0.5170** | **0.3874** | **6** | **8** | **19.00** | **420.0** | **<0.0001** |
|  | **WD - AT vs. INT - AT** | **0.9044** | **0.5310** | **0.3734** | **6** | **8** | **18.31** | **420.0** | **<0.0001** |
|  | INT - Control vs. INT - AT | 0.5170 | 0.5310 | -0.01408 | 8 | 8 | 0.7454 | 420.0 | 0.9951 |
|  |  |  |  |  |  |  |  |  |  |
|  | **Week 3** |  |  |  |  |  |  |  |  |
|  | **CD - Control vs. CD - AT** | **0.3105** | **0.6407** | **-0.3303** | **7** | **6** | **15.72** | **420.0** | **<0.0001** |
|  | **CD - Control vs. WD - Control** | **0.3105** | **0.6334** | **-0.3229** | **7** | **6** | **15.37** | **420.0** | **<0.0001** |
|  | **CD - Control vs. WD - AT** | **0.3105** | **0.6336** | **-0.3231** | **7** | **6** | **15.38** | **420.0** | **<0.0001** |
|  | **CD - Control vs. INT - Control** | **0.3105** | **0.6509** | **-0.3404** | **7** | **8** | **17.42** | **420.0** | **<0.0001** |
|  | **CD - Control vs. INT - AT** | **0.3105** | **0.6372** | **-0.3268** | **7** | **8** | **16.72** | **420.0** | **<0.0001** |
|  | CD - AT vs. WD - Control | 0.6407 | 0.6334 | 0.007367 | 6 | 6 | 0.3379 | 420.0 | 0.9999 |
|  | CD - AT vs. WD - AT | 0.6407 | 0.6336 | 0.007183 | 6 | 6 | 0.3294 | 420.0 | >0.9999 |
|  | CD - AT vs. INT - Control | 0.6407 | 0.6509 | -0.01014 | 6 | 8 | 0.4972 | 420.0 | 0.9993 |
|  | CD - AT vs. INT - AT | 0.6407 | 0.6372 | 0.003521 | 6 | 8 | 0.1726 | 420.0 | >0.9999 |
|  | WD - Control vs. WD - AT | 0.6334 | 0.6336 | -0.0001833 | 6 | 6 | 0.008408 | 420.0 | >0.9999 |
|  | WD - Control vs. INT - Control | 0.6334 | 0.6509 | -0.01751 | 6 | 8 | 0.8584 | 420.0 | 0.9905 |
|  | WD - Control vs. INT - AT | 0.6334 | 0.6372 | -0.003846 | 6 | 8 | 0.1886 | 420.0 | >0.9999 |
|  | WD - AT vs. INT - Control | 0.6336 | 0.6509 | -0.01732 | 6 | 8 | 0.8494 | 420.0 | 0.9910 |
|  | WD - AT vs. INT - AT | 0.6336 | 0.6372 | -0.003662 | 6 | 8 | 0.1796 | 420.0 | >0.9999 |
|  | INT - Control vs. INT - AT | 0.6509 | 0.6372 | 0.01366 | 8 | 8 | 0.7235 | 420.0 | 0.9957 |
|  |  |  |  |  |  |  |  |  |  |
|  | **Week 4** |  |  |  |  |  |  |  |  |
|  | **CD - Control vs. CD - AT** | **0.2730** | **0.5784** | **-0.3054** | **7** | **6** | **14.53** | **420.0** | **<0.0001** |
|  | **CD - Control vs. WD - Control** | **0.2730** | **0.5703** | **-0.2973** | **7** | **6** | **14.15** | **420.0** | **<0.0001** |
|  | **CD - Control vs. WD - AT** | **0.2730** | **0.5391** | **-0.2661** | **7** | **6** | **12.66** | **420.0** | **<0.0001** |
|  | **CD - Control vs. INT - Control** | **0.2730** | **0.5738** | **-0.3008** | **7** | **8** | **15.39** | **420.0** | **<0.0001** |
|  | **CD - Control vs. INT - AT** | **0.2730** | **0.5604** | **-0.2873** | **7** | **8** | **14.70** | **420.0** | **<0.0001** |
|  | CD - AT vs. WD - Control | 0.5784 | 0.5703 | 0.008083 | 6 | 6 | 0.3707 | 420.0 | 0.9998 |
|  | CD - AT vs. WD - AT | 0.5784 | 0.5391 | 0.03930 | 6 | 6 | 1.802 | 420.0 | 0.7989 |
|  | CD - AT vs. INT - Control | 0.5784 | 0.5738 | 0.004600 | 6 | 8 | 0.2255 | 420.0 | >0.9999 |
|  | CD - AT vs. INT - AT | 0.5784 | 0.5604 | 0.01804 | 6 | 8 | 0.8844 | 420.0 | 0.9891 |
|  | WD - Control vs. WD - AT | 0.5703 | 0.5391 | 0.03122 | 6 | 6 | 1.432 | 420.0 | 0.9137 |
|  | WD - Control vs. INT - Control | 0.5703 | 0.5738 | -0.003483 | 6 | 8 | 0.1708 | 420.0 | >0.9999 |
|  | WD - Control vs. INT - AT | 0.5703 | 0.5604 | 0.009954 | 6 | 8 | 0.4880 | 420.0 | 0.9994 |
|  | WD - AT vs. INT - Control | 0.5391 | 0.5738 | -0.03470 | 6 | 8 | 1.701 | 420.0 | 0.8353 |
|  | WD - AT vs. INT - AT | 0.5391 | 0.5604 | -0.02126 | 6 | 8 | 1.042 | 420.0 | 0.9772 |
|  | INT - Control vs. INT - AT | 0.5738 | 0.5604 | 0.01344 | 8 | 8 | 0.7116 | 420.0 | 0.9960 |
|  |  |  |  |  |  |  |  |  |  |
|  | **Week 5** |  |  |  |  |  |  |  |  |
|  | **CD - Control vs. CD - AT** | **0.2400** | **0.4831** | **-0.2431** | **7** | **6** | **11.57** | **420.0** | **<0.0001** |
|  | **CD - Control vs. WD - Control** | **0.2400** | **0.5035** | **-0.2635** | **7** | **6** | **12.54** | **420.0** | **<0.0001** |
|  | **CD - Control vs. WD - AT** | **0.2400** | **0.5128** | **-0.2729** | **7** | **6** | **12.99** | **420.0** | **<0.0001** |
|  | **CD - Control vs. INT - Control** | **0.2400** | **0.4857** | **-0.2458** | **7** | **8** | **12.57** | **420.0** | **<0.0001** |
|  | **CD - Control vs. INT - AT** | **0.2400** | **0.4977** | **-0.2577** | **7** | **8** | **13.18** | **420.0** | **<0.0001** |
|  | CD - AT vs. WD - Control | 0.4831 | 0.5035 | -0.02045 | 6 | 6 | 0.9379 | 420.0 | 0.9858 |
|  | CD - AT vs. WD - AT | 0.4831 | 0.5128 | -0.02977 | 6 | 6 | 1.365 | 420.0 | 0.9286 |
|  | CD - AT vs. INT - Control | 0.4831 | 0.4857 | -0.002688 | 6 | 8 | 0.1318 | 420.0 | >0.9999 |
|  | CD - AT vs. INT - AT | 0.4831 | 0.4977 | -0.01461 | 6 | 8 | 0.7164 | 420.0 | 0.9959 |
|  | WD - Control vs. WD - AT | 0.5035 | 0.5128 | -0.009317 | 6 | 6 | 0.4273 | 420.0 | 0.9997 |
|  | WD - Control vs. INT - Control | 0.5035 | 0.4857 | 0.01776 | 6 | 8 | 0.8709 | 420.0 | 0.9899 |
|  | WD - Control vs. INT - AT | 0.5035 | 0.4977 | 0.005837 | 6 | 8 | 0.2862 | 420.0 | >0.9999 |
|  | WD - AT vs. INT - Control | 0.5128 | 0.4857 | 0.02708 | 6 | 8 | 1.328 | 420.0 | 0.9362 |
|  | WD - AT vs. INT - AT | 0.5128 | 0.4977 | 0.01515 | 6 | 8 | 0.7430 | 420.0 | 0.9952 |
|  | INT - Control vs. INT - AT | 0.4857 | 0.4977 | -0.01193 | 8 | 8 | 0.6315 | 420.0 | 0.9978 |
|  |  |  |  |  |  |  |  |  |  |
|  | **Week 6** |  |  |  |  |  |  |  |  |
|  | **CD - Control vs. CD - AT** | **0.2301** | **0.4402** | **-0.2100** | **7** | **6** | **9.996** | **420.0** | **<0.0001** |
|  | **CD - Control vs. WD - Control** | **0.2301** | **0.4186** | **-0.1885** | **7** | **6** | **8.970** | **420.0** | **<0.0001** |
|  | **CD - Control vs. WD - AT** | **0.2301** | **0.4422** | **-0.2120** | **7** | **6** | **10.09** | **420.0** | **<0.0001** |
|  | **CD - Control vs. INT - Control** | **0.2301** | **0.4690** | **-0.2388** | **7** | **8** | **12.22** | **420.0** | **<0.0001** |
|  | **CD - Control vs. INT - AT** | **0.2301** | **0.4441** | **-0.2139** | **7** | **8** | **10.95** | **420.0** | **<0.0001** |
|  | CD - AT vs. WD - Control | 0.4402 | 0.4186 | 0.02155 | 6 | 6 | 0.9883 | 420.0 | 0.9820 |
|  | CD - AT vs. WD - AT | 0.4402 | 0.4422 | -0.002017 | 6 | 6 | 0.09249 | 420.0 | >0.9999 |
|  | CD - AT vs. INT - Control | 0.4402 | 0.4690 | -0.02880 | 6 | 8 | 1.412 | 420.0 | 0.9183 |
|  | CD - AT vs. INT - AT | 0.4402 | 0.4441 | -0.003925 | 6 | 8 | 0.1924 | 420.0 | >0.9999 |
|  | WD - Control vs. WD - AT | 0.4186 | 0.4422 | -0.02357 | 6 | 6 | 1.081 | 420.0 | 0.9733 |
|  | WD - Control vs. INT - Control | 0.4186 | 0.4690 | -0.05035 | 6 | 8 | 2.469 | 420.0 | 0.5024 |
|  | WD - Control vs. INT - AT | 0.4186 | 0.4441 | -0.02547 | 6 | 8 | 1.249 | 420.0 | 0.9504 |
|  | WD - AT vs. INT - Control | 0.4422 | 0.4690 | -0.02678 | 6 | 8 | 1.313 | 420.0 | 0.9390 |
|  | WD - AT vs. INT - AT | 0.4422 | 0.4441 | -0.001908 | 6 | 8 | 0.09356 | 420.0 | >0.9999 |
|  | INT - Control vs. INT - AT | 0.4690 | 0.4441 | 0.02488 | 8 | 8 | 1.317 | 420.0 | 0.9382 |
|  |  |  |  |  |  |  |  |  |  |
|  | **Week 7** |  |  |  |  |  |  |  |  |
|  | **CD - Control vs. CD - AT** | **0.2467** | **0.5161** | **-0.2695** | **7** | **6** | **12.83** | **420.0** | **<0.0001** |
|  | **CD - Control vs. WD - Control** | **0.2467** | **0.5105** | **-0.2639** | **7** | **6** | **12.56** | **420.0** | **<0.0001** |
|  | **CD - Control vs. WD - AT** | **0.2467** | **0.5557** | **-0.3091** | **7** | **6** | **14.71** | **420.0** | **<0.0001** |
|  | **CD - Control vs. INT - Control** | **0.2467** | **0.5189** | **-0.2722** | **7** | **8** | **13.93** | **420.0** | **<0.0001** |
|  | **CD - Control vs. INT - AT** | **0.2467** | **0.5219** | **-0.2753** | **7** | **8** | **14.08** | **420.0** | **<0.0001** |
|  | CD - AT vs. WD - Control | 0.5161 | 0.5105 | 0.005617 | 6 | 6 | 0.2576 | 420.0 | >0.9999 |
|  | CD - AT vs. WD - AT | 0.5161 | 0.5557 | -0.03958 | 6 | 6 | 1.815 | 420.0 | 0.7939 |
|  | CD - AT vs. INT - Control | 0.5161 | 0.5189 | -0.002767 | 6 | 8 | 0.1356 | 420.0 | >0.9999 |
|  | CD - AT vs. INT - AT | 0.5161 | 0.5219 | -0.005804 | 6 | 8 | 0.2846 | 420.0 | >0.9999 |
|  | WD - Control vs. WD - AT | 0.5105 | 0.5557 | -0.04520 | 6 | 6 | 2.073 | 420.0 | 0.6863 |
|  | WD - Control vs. INT - Control | 0.5105 | 0.5189 | -0.008383 | 6 | 8 | 0.4110 | 420.0 | 0.9997 |
|  | WD - Control vs. INT - AT | 0.5105 | 0.5219 | -0.01142 | 6 | 8 | 0.5600 | 420.0 | 0.9987 |
|  | WD - AT vs. INT - Control | 0.5557 | 0.5189 | 0.03682 | 6 | 8 | 1.805 | 420.0 | 0.7978 |
|  | WD - AT vs. INT - AT | 0.5557 | 0.5219 | 0.03378 | 6 | 8 | 1.656 | 420.0 | 0.8504 |
|  | INT - Control vs. INT - AT | 0.5189 | 0.5219 | -0.003037 | 8 | 8 | 0.1609 | 420.0 | >0.9999 |
|  |  |  |  |  |  |  |  |  |  |
|  | **Week 8** |  |  |  |  |  |  |  |  |
|  | **CD - Control vs. CD - AT** | **0.2181** | **0.4324** | **-0.2142** | **7** | **6** | **10.20** | **420.0** | **<0.0001** |
|  | **CD - Control vs. WD - Control** | **0.2181** | **0.4716** | **-0.2534** | **7** | **6** | **12.06** | **420.0** | **<0.0001** |
|  | **CD - Control vs. WD - AT** | **0.2181** | **0.4700** | **-0.2519** | **7** | **6** | **11.99** | **420.0** | **<0.0001** |
|  | CD - Control vs. INT - Control | 0.2181 | 0.2452 | -0.02708 | 7 | 8 | 1.386 | 420.0 | 0.9242 |
|  | CD - Control vs. INT - AT | 0.2181 | 0.2435 | -0.02532 | 7 | 8 | 1.295 | 420.0 | 0.9423 |
|  | CD - AT vs. WD - Control | 0.4324 | 0.4716 | -0.03920 | 6 | 6 | 1.798 | 420.0 | 0.8006 |
|  | CD - AT vs. WD - AT | 0.4324 | 0.4700 | -0.03765 | 6 | 6 | 1.727 | 420.0 | 0.8265 |
|  | **CD - AT vs. INT - Control** | **0.4324** | **0.2452** | **0.1872** | **6** | **8** | **9.176** | **420.0** | **<0.0001** |
|  | **CD - AT vs. INT - AT** | **0.4324** | **0.2435** | **0.1889** | **6** | **8** | **9.263** | **420.0** | **<0.0001** |
|  | WD - Control vs. WD - AT | 0.4716 | 0.4700 | 0.001550 | 6 | 6 | 0.07109 | 420.0 | >0.9999 |
|  | **WD - Control vs. INT - Control** | **0.4716** | **0.2452** | **0.2264** | **6** | **8** | **11.10** | **420.0** | **<0.0001** |
|  | **WD - Control vs. INT - AT** | **0.4716** | **0.2435** | **0.2281** | **6** | **8** | **11.18** | **420.0** | **<0.0001** |
|  | **WD - AT vs. INT - Control** | **0.4700** | **0.2452** | **0.2248** | **6** | **8** | **11.02** | **420.0** | **<0.0001** |
|  | **WD - AT vs. INT - AT** | **0.4700** | **0.2435** | **0.2266** | **6** | **8** | **11.11** | **420.0** | **<0.0001** |
|  | INT - Control vs. INT - AT | 0.2452 | 0.2435 | 0.001763 | 8 | 8 | 0.09334 | 420.0 | >0.9999 |
|  |  |  |  |  |  |  |  |  |  |
|  | **Week 9** |  |  |  |  |  |  |  |  |
|  | **CD - Control vs. CD - AT** | **0.2073** | **0.3932** | **-0.1859** | **7** | **6** | **8.847** | **420.0** | **<0.0001** |
|  | **CD - Control vs. WD - Control** | **0.2073** | **0.3683** | **-0.1610** | **7** | **6** | **7.663** | **420.0** | **<0.0001** |
|  | **CD - Control vs. WD - AT** | **0.2073** | **0.3750** | **-0.1677** | **7** | **6** | **7.982** | **420.0** | **<0.0001** |
|  | **CD - Control vs. INT - Control** | **0.2073** | **0.3445** | **-0.1372** | **7** | **8** | **7.020** | **420.0** | **<0.0001** |
|  | **CD - Control vs. INT - AT** | **0.2073** | **0.3323** | **-0.1250** | **7** | **8** | **6.397** | **420.0** | **0.0001** |
|  | CD - AT vs. WD - Control | 0.3932 | 0.3683 | 0.02487 | 6 | 6 | 1.140 | 420.0 | 0.9663 |
|  | CD - AT vs. WD - AT | 0.3932 | 0.3750 | 0.01817 | 6 | 6 | 0.8332 | 420.0 | 0.9917 |
|  | CD - AT vs. INT - Control | 0.3932 | 0.3445 | 0.04867 | 6 | 8 | 2.386 | 420.0 | 0.5410 |
|  | CD - AT vs. INT - AT | 0.3932 | 0.3323 | 0.06084 | 6 | 8 | 2.983 | 420.0 | 0.2844 |
|  | WD - Control vs. WD - AT | 0.3683 | 0.3750 | -0.006700 | 6 | 6 | 0.3073 | 420.0 | >0.9999 |
|  | WD - Control vs. INT - Control | 0.3683 | 0.3445 | 0.02380 | 6 | 8 | 1.167 | 420.0 | 0.9628 |
|  | WD - Control vs. INT - AT | 0.3683 | 0.3323 | 0.03598 | 6 | 8 | 1.764 | 420.0 | 0.8132 |
|  | WD - AT vs. INT - Control | 0.3750 | 0.3445 | 0.03050 | 6 | 8 | 1.495 | 420.0 | 0.8978 |
|  | WD - AT vs. INT - AT | 0.3750 | 0.3323 | 0.04268 | 6 | 8 | 2.092 | 420.0 | 0.6776 |
|  | INT - Control vs. INT - AT | 0.3445 | 0.3323 | 0.01217 | 8 | 8 | 0.6448 | 420.0 | 0.9975 |
|  |  |  |  |  |  |  |  |  |  |
|  | **Week 10** |  |  |  |  |  |  |  |  |
|  | **CD - Control vs. CD - AT** | **0.1963** | **0.3663** | **-0.1700** | **7** | **6** | **8.092** | **420.0** | **<0.0001** |
|  | **CD - Control vs. WD - Control** | **0.1963** | **0.3618** | **-0.1655** | **7** | **6** | **7.876** | **420.0** | **<0.0001** |
|  | **CD - Control vs. WD - AT** | **0.1963** | **0.3572** | **-0.1609** | **7** | **6** | **7.659** | **420.0** | **<0.0001** |
|  | **CD - Control vs. INT - Control** | **0.1963** | **0.3254** | **-0.1291** | **7** | **8** | **6.607** | **420.0** | **<0.0001** |
|  | **CD - Control vs. INT - AT** | **0.1963** | **0.3318** | **-0.1355** | **7** | **8** | **6.934** | **420.0** | **<0.0001** |
|  | CD - AT vs. WD - Control | 0.3663 | 0.3618 | 0.004533 | 6 | 6 | 0.2079 | 420.0 | >0.9999 |
|  | CD - AT vs. WD - AT | 0.3663 | 0.3572 | 0.009083 | 6 | 6 | 0.4166 | 420.0 | 0.9997 |
|  | CD - AT vs. INT - Control | 0.3663 | 0.3254 | 0.04088 | 6 | 8 | 2.004 | 420.0 | 0.7166 |
|  | CD - AT vs. INT - AT | 0.3663 | 0.3318 | 0.03449 | 6 | 8 | 1.691 | 420.0 | 0.8388 |
|  | WD - Control vs. WD - AT | 0.3618 | 0.3572 | 0.004550 | 6 | 6 | 0.2087 | 420.0 | >0.9999 |
|  | WD - Control vs. INT - Control | 0.3618 | 0.3254 | 0.03635 | 6 | 8 | 1.782 | 420.0 | 0.8065 |
|  | WD - Control vs. INT - AT | 0.3618 | 0.3318 | 0.02996 | 6 | 8 | 1.469 | 420.0 | 0.9047 |
|  | WD - AT vs. INT - Control | 0.3572 | 0.3254 | 0.03180 | 6 | 8 | 1.559 | 420.0 | 0.8803 |
|  | WD - AT vs. INT - AT | 0.3572 | 0.3318 | 0.02541 | 6 | 8 | 1.246 | 420.0 | 0.9510 |
|  | INT - Control vs. INT - AT | 0.3254 | 0.3318 | -0.006387 | 8 | 8 | 0.3383 | 420.0 | 0.9999 |
|  |  |  |  |  |  |  |  |  |  |
|  | **Week 11** |  |  |  |  |  |  |  |  |
|  | **CD - Control vs. CD - AT** | **0.2218** | **0.4090** | **-0.1872** | **7** | **6** | **8.911** | **420.0** | **<0.0001** |
|  | **CD - Control vs. WD - Control** | **0.2218** | **0.3762** | **-0.1543** | **7** | **6** | **7.345** | **420.0** | **<0.0001** |
|  | **CD - Control vs. WD - AT** | **0.2218** | **0.3761** | **-0.1543** | **7** | **6** | **7.342** | **420.0** | **<0.0001** |
|  | **CD - Control vs. INT - Control** | **0.2218** | **0.3181** | **-0.09624** | **7** | **8** | **4.924** | **420.0** | **0.0072** |
|  | **CD - Control vs. INT - AT** | **0.2218** | **0.3174** | **-0.09555** | **7** | **8** | **4.888** | **420.0** | **0.0079** |
|  | CD - AT vs. WD - Control | 0.4090 | 0.3762 | 0.03288 | 6 | 6 | 1.508 | 420.0 | 0.8944 |
|  | CD - AT vs. WD - AT | 0.4090 | 0.3761 | 0.03295 | 6 | 6 | 1.511 | 420.0 | 0.8936 |
|  | **CD - AT vs. INT - Control** | **0.4090** | **0.3181** | **0.09098** | **6** | **8** | **4.461** | **420.0** | **0.0212** |
|  | **CD - AT vs. INT - AT** | **0.4090** | **0.3174** | **0.09167** | **6** | **8** | **4.495** | **420.0** | **0.0197** |
|  | WD - Control vs. WD - AT | 0.3762 | 0.3761 | 6.667e-005 | 6 | 6 | 0.003058 | 420.0 | >0.9999 |
|  | WD - Control vs. INT - Control | 0.3762 | 0.3181 | 0.05810 | 6 | 8 | 2.849 | 420.0 | 0.3359 |
|  | WD - Control vs. INT - AT | 0.3762 | 0.3174 | 0.05879 | 6 | 8 | 2.882 | 420.0 | 0.3225 |
|  | WD - AT vs. INT - Control | 0.3761 | 0.3181 | 0.05803 | 6 | 8 | 2.845 | 420.0 | 0.3372 |
|  | WD - AT vs. INT - AT | 0.3761 | 0.3174 | 0.05872 | 6 | 8 | 2.879 | 420.0 | 0.3238 |
|  | INT - Control vs. INT - AT | 0.3181 | 0.3174 | 0.0006875 | 8 | 8 | 0.03641 | 420.0 | >0.9999 |
|  |  |  |  |  |  |  |  |  |  |
|  | **Week 12** |  |  |  |  |  |  |  |  |
|  | **CD - Control vs. CD - AT** | **0.1894** | **0.3654** | **-0.1760** | **7** | **6** | **8.377** | **420.0** | **<0.0001** |
|  | **CD - Control vs. WD - Control** | **0.1894** | **0.3162** | **-0.1268** | **7** | **6** | **6.033** | **420.0** | **0.0004** |
|  | **CD - Control vs. WD - AT** | **0.1894** | **0.3269** | **-0.1374** | **7** | **6** | **6.541** | **420.0** | **<0.0001** |
|  | **CD - Control vs. INT - Control** | **0.1894** | **0.3836** | **-0.1941** | **7** | **8** | **9.933** | **420.0** | **<0.0001** |
|  | **CD - Control vs. INT - AT** | **0.1894** | **0.3701** | **-0.1807** | **7** | **8** | **9.245** | **420.0** | **<0.0001** |
|  | CD - AT vs. WD - Control | 0.3654 | 0.3162 | 0.04925 | 6 | 6 | 2.259 | 420.0 | 0.6009 |
|  | CD - AT vs. WD - AT | 0.3654 | 0.3269 | 0.03857 | 6 | 6 | 1.769 | 420.0 | 0.8114 |
|  | CD - AT vs. INT - Control | 0.3654 | 0.3836 | -0.01814 | 6 | 8 | 0.8895 | 420.0 | 0.9888 |
|  | CD - AT vs. INT - AT | 0.3654 | 0.3701 | -0.004692 | 6 | 8 | 0.2300 | 420.0 | >0.9999 |
|  | WD - Control vs. WD - AT | 0.3162 | 0.3269 | -0.01068 | 6 | 6 | 0.4900 | 420.0 | 0.9993 |
|  | WD - Control vs. INT - Control | 0.3162 | 0.3836 | -0.06739 | 6 | 8 | 3.304 | 420.0 | 0.1819 |
|  | WD - Control vs. INT - AT | 0.3162 | 0.3701 | -0.05394 | 6 | 8 | 2.645 | 420.0 | 0.4221 |
|  | WD - AT vs. INT - Control | 0.3269 | 0.3836 | -0.05671 | 6 | 8 | 2.780 | 420.0 | 0.3637 |
|  | WD - AT vs. INT - AT | 0.3269 | 0.3701 | -0.04326 | 6 | 8 | 2.121 | 420.0 | 0.6647 |
|  | INT - Control vs. INT - AT | 0.3836 | 0.3701 | 0.01345 | 8 | 8 | 0.7123 | 420.0 | 0.9960 |
|  |  |  |  |  |  |  |  |  |  |

| **Fig.** | **ANOVA table** | **SS (Type III)** | **DF** | **MS** | **F (DFn, DFd)** | **P value** |
| --- | --- | --- | --- | --- | --- | --- |
| S Fig 5B - | **Interaction** | **0.5231** | **55** | **0.009511** | **F (55, 372) = 5.464** | **<0.0001** |
| Males | **Stress** | **9.253** | **11** | **0.8412** | **F (11, 372) = 483.3** | **<0.0001** |
|  | **Diet** | **0.2238** | **5** | **0.04475** | **F (5, 372) = 25.71** | **<0.0001** |
|  | Residual | 0.6475 | 372 | 0.001741 |  |  |
|  |  |  |  |  |  |  |

|  | **Test details** | **Mean 1** | **Mean 2** | **Mean diff.** | **N1** | **N2** | **q** | **DF** | **P value** |
| --- | --- | --- | --- | --- | --- | --- | --- | --- | --- |
|  | **Week 1** |  |  |  |  |  |  |  |  |
|  | CD - Control vs. CD - AT | 0.7166 | 0.6819 | 0.03470 | 6 | 6 | 2.037 | 372.0 | 0.7021 |
|  | CD - Control vs. WD - Control | 0.7166 | 0.7843 | -0.06775 | 6 | 6 | 3.978 | 372.0 | 0.0576 |
|  | **CD - Control vs. WD - AT** | **0.7166** | **0.6419** | **0.07470** | **6** | **6** | **4.386** | **372.0** | **0.0251** |
|  | **CD - Control vs. INT - Control** | **0.7166** | **0.8273** | **-0.1107** | **6** | **7** | **6.746** | **372.0** | **<0.0001** |
|  | **CD - Control vs. INT - AT** | **0.7166** | **0.6421** | **0.07452** | **6** | **6** | **4.375** | **372.0** | **0.0257** |
|  | **CD - AT vs. WD - Control** | **0.6819** | **0.7843** | **-0.1025** | **6** | **6** | **6.015** | **372.0** | **0.0004** |
|  | CD - AT vs. WD - AT | 0.6819 | 0.6419 | 0.04000 | 6 | 6 | 2.349 | 372.0 | 0.5588 |
|  | **CD - AT vs. INT - Control** | **0.6819** | **0.8273** | **-0.1454** | **6** | **7** | **8.860** | **372.0** | **<0.0001** |
|  | CD - AT vs. INT - AT | 0.6819 | 0.6421 | 0.03982 | 6 | 6 | 2.338 | 372.0 | 0.5638 |
|  | **WD - Control vs. WD - AT** | **0.7843** | **0.6419** | **0.1425** | **6** | **6** | **8.364** | **372.0** | **<0.0001** |
|  | WD - Control vs. INT - Control | 0.7843 | 0.8273 | -0.04297 | 6 | 7 | 2.618 | 372.0 | 0.4342 |
|  | **WD - Control vs. INT - AT** | **0.7843** | **0.6421** | **0.1423** | **6** | **6** | **8.353** | **372.0** | **<0.0001** |
|  | **WD - AT vs. INT - Control** | **0.6419** | **0.8273** | **-0.1854** | **6** | **7** | **11.30** | **372.0** | **<0.0001** |
|  | WD - AT vs. INT - AT | 0.6419 | 0.6421 | -0.0001833 | 6 | 6 | 0.01076 | 372.0 | >0.9999 |
|  | **INT - Control vs. INT - AT** | **0.8273** | **0.6421** | **0.1852** | **7** | **6** | **11.29** | **372.0** | **<0.0001** |
|  |  |  |  |  |  |  |  |  |  |
|  | **Week 2** |  |  |  |  |  |  |  |  |
|  | CD - Control vs. CD - AT | 0.6958 | 0.6791 | 0.01663 | 6 | 6 | 0.9766 | 372.0 | 0.9829 |
|  | CD - Control vs. WD - Control | 0.6958 | 0.7517 | -0.05592 | 6 | 6 | 3.283 | 372.0 | 0.1880 |
|  | CD - Control vs. WD - AT | 0.6958 | 0.6673 | 0.02845 | 6 | 6 | 1.670 | 372.0 | 0.8457 |
|  | CD - Control vs. INT - Control | 0.6958 | 0.7001 | -0.004321 | 6 | 7 | 0.2633 | 372.0 | >0.9999 |
|  | **CD - Control vs. INT - AT** | **0.6958** | **0.5355** | **0.1603** | **6** | **6** | **9.410** | **372.0** | **<0.0001** |
|  | CD - AT vs. WD - Control | 0.6791 | 0.7517 | -0.07255 | 6 | 6 | 4.260 | 372.0 | 0.0328 |
|  | CD - AT vs. WD - AT | 0.6791 | 0.6673 | 0.01182 | 6 | 6 | 0.6938 | 372.0 | 0.9965 |
|  | CD - AT vs. INT - Control | 0.6791 | 0.7001 | -0.02095 | 6 | 7 | 1.277 | 372.0 | 0.9457 |
|  | **CD - AT vs. INT - AT** | **0.6791** | **0.5355** | **0.1436** | **6** | **6** | **8.433** | **372.0** | **<0.0001** |
|  | **WD - Control vs. WD - AT** | **0.7517** | **0.6673** | **0.08437** | **6** | **6** | **4.953** | **372.0** | **0.0068** |
|  | WD - Control vs. INT - Control | 0.7517 | 0.7001 | 0.05160 | 6 | 7 | 3.144 | 372.0 | 0.2297 |
|  | **WD - Control vs. INT - AT** | **0.7517** | **0.5355** | **0.2162** | **6** | **6** | **12.69** | **372.0** | **<0.0001** |
|  | WD - AT vs. INT - Control | 0.6673 | 0.7001 | -0.03277 | 6 | 7 | 1.997 | 372.0 | 0.7198 |
|  | **WD - AT vs. INT - AT** | **0.6673** | **0.5355** | **0.1318** | **6** | **6** | **7.739** | **372.0** | **<0.0001** |
|  | **INT - Control vs. INT - AT** | **0.7001** | **0.5355** | **0.1646** | **7** | **6** | **10.03** | **372.0** | **<0.0001** |
|  |  |  |  |  |  |  |  |  |  |
|  | **Week 3** |  |  |  |  |  |  |  |  |
|  | CD - Control vs. CD - AT | 0.6125 | 0.6115 | 0.001000 | 6 | 6 | 0.05871 | 372.0 | >0.9999 |
|  | CD - Control vs. WD - Control | 0.6125 | 0.6307 | -0.01815 | 6 | 6 | 1.066 | 372.0 | 0.9749 |
|  | CD - Control vs. WD - AT | 0.6125 | 0.6345 | -0.02197 | 6 | 6 | 1.290 | 372.0 | 0.9433 |
|  | CD - Control vs. INT - Control | 0.6125 | 0.6199 | -0.007355 | 6 | 7 | 0.4481 | 372.0 | 0.9996 |
|  | CD - Control vs. INT - AT | 0.6125 | 0.5794 | 0.03313 | 6 | 6 | 1.945 | 372.0 | 0.7417 |
|  | CD - AT vs. WD - Control | 0.6115 | 0.6307 | -0.01915 | 6 | 6 | 1.124 | 372.0 | 0.9683 |
|  | CD - AT vs. WD - AT | 0.6115 | 0.6345 | -0.02297 | 6 | 6 | 1.348 | 372.0 | 0.9320 |
|  | CD - AT vs. INT - Control | 0.6115 | 0.6199 | -0.008355 | 6 | 7 | 0.5091 | 372.0 | 0.9992 |
|  | CD - AT vs. INT - AT | 0.6115 | 0.5794 | 0.03213 | 6 | 6 | 1.887 | 372.0 | 0.7659 |
|  | WD - Control vs. WD - AT | 0.6307 | 0.6345 | -0.003817 | 6 | 6 | 0.2241 | 372.0 | >0.9999 |
|  | WD - Control vs. INT - Control | 0.6307 | 0.6199 | 0.01080 | 6 | 7 | 0.6577 | 372.0 | 0.9973 |
|  | WD - Control vs. INT - AT | 0.6307 | 0.5794 | 0.05128 | 6 | 6 | 3.011 | 372.0 | 0.2746 |
|  | WD - AT vs. INT - Control | 0.6345 | 0.6199 | 0.01461 | 6 | 7 | 0.8903 | 372.0 | 0.9888 |
|  | WD - AT vs. INT - AT | 0.6345 | 0.5794 | 0.05510 | 6 | 6 | 3.235 | 372.0 | 0.2017 |
|  | INT - Control vs. INT - AT | 0.6199 | 0.5794 | 0.04049 | 7 | 6 | 2.467 | 372.0 | 0.5033 |
|  |  |  |  |  |  |  |  |  |  |
|  | **Week 4** |  |  |  |  |  |  |  |  |
|  | CD - Control vs. CD - AT | 0.5089 | 0.5384 | -0.02950 | 6 | 6 | 1.732 | 372.0 | 0.8246 |
|  | CD - Control vs. WD - Control | 0.5089 | 0.5475 | -0.03860 | 6 | 6 | 2.266 | 372.0 | 0.5974 |
|  | CD - Control vs. WD - AT | 0.5089 | 0.5222 | -0.01330 | 6 | 6 | 0.7809 | 372.0 | 0.9939 |
|  | CD - Control vs. INT - Control | 0.5089 | 0.5521 | -0.04323 | 6 | 7 | 2.634 | 372.0 | 0.4270 |
|  | CD - Control vs. INT - AT | 0.5089 | 0.5258 | -0.01690 | 6 | 6 | 0.9922 | 372.0 | 0.9817 |
|  | CD - AT vs. WD - Control | 0.5384 | 0.5475 | -0.009100 | 6 | 6 | 0.5343 | 372.0 | 0.9990 |
|  | CD - AT vs. WD - AT | 0.5384 | 0.5222 | 0.01620 | 6 | 6 | 0.9512 | 372.0 | 0.9848 |
|  | CD - AT vs. INT - Control | 0.5384 | 0.5521 | -0.01373 | 6 | 7 | 0.8368 | 372.0 | 0.9916 |
|  | CD - AT vs. INT - AT | 0.5384 | 0.5258 | 0.01260 | 6 | 6 | 0.7398 | 372.0 | 0.9952 |
|  | WD - Control vs. WD - AT | 0.5475 | 0.5222 | 0.02530 | 6 | 6 | 1.485 | 372.0 | 0.9004 |
|  | WD - Control vs. INT - Control | 0.5475 | 0.5521 | -0.004633 | 6 | 7 | 0.2823 | 372.0 | >0.9999 |
|  | WD - Control vs. INT - AT | 0.5475 | 0.5258 | 0.02170 | 6 | 6 | 1.274 | 372.0 | 0.9461 |
|  | WD - AT vs. INT - Control | 0.5222 | 0.5521 | -0.02993 | 6 | 7 | 1.824 | 372.0 | 0.7907 |
|  | WD - AT vs. INT - AT | 0.5222 | 0.5258 | -0.003600 | 6 | 6 | 0.2114 | 372.0 | >0.9999 |
|  | INT - Control vs. INT - AT | 0.5521 | 0.5258 | 0.02633 | 7 | 6 | 1.604 | 372.0 | 0.8667 |
|  |  |  |  |  |  |  |  |  |  |
|  | **Week 5** |  |  |  |  |  |  |  |  |
|  | CD - Control vs. CD - AT | 0.4703 | 0.4717 | -0.001367 | 6 | 6 | 0.08024 | 372.0 | >0.9999 |
|  | CD - Control vs. WD - Control | 0.4703 | 0.4758 | -0.005517 | 6 | 6 | 0.3239 | 372.0 | >0.9999 |
|  | CD - Control vs. WD - AT | 0.4703 | 0.4700 | 0.0003167 | 6 | 6 | 0.01859 | 372.0 | >0.9999 |
|  | CD - Control vs. INT - Control | 0.4703 | 0.4501 | 0.02020 | 6 | 7 | 1.231 | 372.0 | 0.9534 |
|  | CD - Control vs. INT - AT | 0.4703 | 0.4543 | 0.01595 | 6 | 6 | 0.9365 | 372.0 | 0.9859 |
|  | CD - AT vs. WD - Control | 0.4717 | 0.4758 | -0.004150 | 6 | 6 | 0.2437 | 372.0 | >0.9999 |
|  | CD - AT vs. WD - AT | 0.4717 | 0.4700 | 0.001683 | 6 | 6 | 0.09883 | 372.0 | >0.9999 |
|  | CD - AT vs. INT - Control | 0.4717 | 0.4501 | 0.02156 | 6 | 7 | 1.314 | 372.0 | 0.9388 |
|  | CD - AT vs. INT - AT | 0.4717 | 0.4543 | 0.01732 | 6 | 6 | 1.017 | 372.0 | 0.9796 |
|  | WD - Control vs. WD - AT | 0.4758 | 0.4700 | 0.005833 | 6 | 6 | 0.3425 | 372.0 | 0.9999 |
|  | WD - Control vs. INT - Control | 0.4758 | 0.4501 | 0.02571 | 6 | 7 | 1.567 | 372.0 | 0.8780 |
|  | WD - Control vs. INT - AT | 0.4758 | 0.4543 | 0.02147 | 6 | 6 | 1.260 | 372.0 | 0.9485 |
|  | WD - AT vs. INT - Control | 0.4700 | 0.4501 | 0.01988 | 6 | 7 | 1.211 | 372.0 | 0.9564 |
|  | WD - AT vs. INT - AT | 0.4700 | 0.4543 | 0.01563 | 6 | 6 | 0.9179 | 372.0 | 0.9871 |
|  | INT - Control vs. INT - AT | 0.4501 | 0.4543 | -0.004248 | 7 | 6 | 0.2588 | 372.0 | >0.9999 |
|  |  |  |  |  |  |  |  |  |  |
|  | **Week 6** |  |  |  |  |  |  |  |  |
|  | CD - Control vs. CD - AT | 0.4198 | 0.4194 | 0.0004500 | 6 | 6 | 0.02642 | 372.0 | >0.9999 |
|  | CD - Control vs. WD - Control | 0.4198 | 0.4066 | 0.01318 | 6 | 6 | 0.7740 | 372.0 | 0.9941 |
|  | CD - Control vs. WD - AT | 0.4198 | 0.3874 | 0.03245 | 6 | 6 | 1.905 | 372.0 | 0.7583 |
|  | CD - Control vs. INT - Control | 0.4198 | 0.4107 | 0.009086 | 6 | 7 | 0.5536 | 372.0 | 0.9988 |
|  | **CD - Control vs. INT - AT** | **0.4198** | **0.3034** | **0.1165** | **6** | **6** | **6.837** | **372.0** | **<0.0001** |
|  | CD - AT vs. WD - Control | 0.4194 | 0.4066 | 0.01273 | 6 | 6 | 0.7476 | 372.0 | 0.9950 |
|  | CD - AT vs. WD - AT | 0.4194 | 0.3874 | 0.03200 | 6 | 6 | 1.879 | 372.0 | 0.7690 |
|  | CD - AT vs. INT - Control | 0.4194 | 0.4107 | 0.008636 | 6 | 7 | 0.5262 | 372.0 | 0.9991 |
|  | **CD - AT vs. INT - AT** | **0.4194** | **0.3034** | **0.1160** | **6** | **6** | **6.811** | **372.0** | **<0.0001** |
|  | WD - Control vs. WD - AT | 0.4066 | 0.3874 | 0.01927 | 6 | 6 | 1.131 | 372.0 | 0.9674 |
|  | WD - Control vs. INT - Control | 0.4066 | 0.4107 | -0.004098 | 6 | 7 | 0.2497 | 372.0 | >0.9999 |
|  | **WD - Control vs. INT - AT** | **0.4066** | **0.3034** | **0.1033** | **6** | **6** | **6.063** | **372.0** | **0.0003** |
|  | WD - AT vs. INT - Control | 0.3874 | 0.4107 | -0.02336 | 6 | 7 | 1.424 | 372.0 | 0.9156 |
|  | **WD - AT vs. INT - AT** | **0.3874** | **0.3034** | **0.08400** | **6** | **6** | **4.932** | **372.0** | **0.0072** |
|  | **INT - Control vs. INT - AT** | **0.4107** | **0.3034** | **0.1074** | **7** | **6** | **6.542** | **372.0** | **<0.0001** |
|  |  |  |  |  |  |  |  |  |  |
|  | **Week 7** |  |  |  |  |  |  |  |  |
|  | CD - Control vs. CD - AT | 0.3425 | 0.3426 | -5.000e-005 | 6 | 6 | 0.002936 | 372.0 | >0.9999 |
|  | CD - Control vs. WD - Control | 0.3425 | 0.3448 | -0.002300 | 6 | 6 | 0.1350 | 372.0 | >0.9999 |
|  | CD - Control vs. WD - AT | 0.3425 | 0.3381 | 0.004417 | 6 | 6 | 0.2593 | 372.0 | >0.9999 |
|  | CD - Control vs. INT - Control | 0.3425 | 0.3545 | -0.01195 | 6 | 7 | 0.7284 | 372.0 | 0.9956 |
|  | CD - Control vs. INT - AT | 0.3425 | 0.3287 | 0.01385 | 6 | 6 | 0.8132 | 372.0 | 0.9926 |
|  | CD - AT vs. WD - Control | 0.3426 | 0.3448 | -0.002250 | 6 | 6 | 0.1321 | 372.0 | >0.9999 |
|  | CD - AT vs. WD - AT | 0.3426 | 0.3381 | 0.004467 | 6 | 6 | 0.2623 | 372.0 | >0.9999 |
|  | CD - AT vs. INT - Control | 0.3426 | 0.3545 | -0.01190 | 6 | 7 | 0.7253 | 372.0 | 0.9957 |
|  | CD - AT vs. INT - AT | 0.3426 | 0.3287 | 0.01390 | 6 | 6 | 0.8161 | 372.0 | 0.9925 |
|  | WD - Control vs. WD - AT | 0.3448 | 0.3381 | 0.006717 | 6 | 6 | 0.3944 | 372.0 | 0.9998 |
|  | WD - Control vs. INT - Control | 0.3448 | 0.3545 | -0.009655 | 6 | 7 | 0.5883 | 372.0 | 0.9984 |
|  | WD - Control vs. INT - AT | 0.3448 | 0.3287 | 0.01615 | 6 | 6 | 0.9482 | 372.0 | 0.9851 |
|  | WD - AT vs. INT - Control | 0.3381 | 0.3545 | -0.01637 | 6 | 7 | 0.9975 | 372.0 | 0.9812 |
|  | WD - AT vs. INT - AT | 0.3381 | 0.3287 | 0.009433 | 6 | 6 | 0.5539 | 372.0 | 0.9988 |
|  | INT - Control vs. INT - AT | 0.3545 | 0.3287 | 0.02580 | 7 | 6 | 1.572 | 372.0 | 0.8764 |
|  |  |  |  |  |  |  |  |  |  |
|  | **Week 8** |  |  |  |  |  |  |  |  |
|  | CD - Control vs. CD - AT | 0.3852 | 0.3988 | -0.01360 | 6 | 6 | 0.7985 | 372.0 | 0.9932 |
|  | CD - Control vs. WD - Control | 0.3852 | 0.4130 | -0.02782 | 6 | 6 | 1.633 | 372.0 | 0.8578 |
|  | CD - Control vs. WD - AT | 0.3852 | 0.4105 | -0.02533 | 6 | 6 | 1.487 | 372.0 | 0.8999 |
|  | **CD - Control vs. INT - Control** | **0.3852** | **0.2530** | **0.1321** | **6** | **7** | **8.051** | **372.0** | **<0.0001** |
|  | **CD - Control vs. INT - AT** | **0.3852** | **0.2502** | **0.1350** | **6** | **6** | **7.926** | **372.0** | **<0.0001** |
|  | CD - AT vs. WD - Control | 0.3988 | 0.4130 | -0.01422 | 6 | 6 | 0.8347 | 372.0 | 0.9917 |
|  | CD - AT vs. WD - AT | 0.3988 | 0.4105 | -0.01173 | 6 | 6 | 0.6889 | 372.0 | 0.9966 |
|  | **CD - AT vs. INT - Control** | **0.3988** | **0.2530** | **0.1457** | **6** | **7** | **8.880** | **372.0** | **<0.0001** |
|  | **CD - AT vs. INT - AT** | **0.3988** | **0.2502** | **0.1486** | **6** | **6** | **8.725** | **372.0** | **<0.0001** |
|  | WD - Control vs. WD - AT | 0.4130 | 0.4105 | 0.002483 | 6 | 6 | 0.1458 | 372.0 | >0.9999 |
|  | **WD - Control vs. INT - Control** | **0.4130** | **0.2530** | **0.1600** | **6** | **7** | **9.746** | **372.0** | **<0.0001** |
|  | **WD - Control vs. INT - AT** | **0.4130** | **0.2502** | **0.1628** | **6** | **6** | **9.559** | **372.0** | **<0.0001** |
|  | **WD - AT vs. INT - Control** | **0.4105** | **0.2530** | **0.1575** | **6** | **7** | **9.594** | **372.0** | **<0.0001** |
|  | **WD - AT vs. INT - AT** | **0.4105** | **0.2502** | **0.1603** | **6** | **6** | **9.414** | **372.0** | **<0.0001** |
|  | INT - Control vs. INT - AT | 0.2530 | 0.2502 | 0.002864 | 7 | 6 | 0.1745 | 372.0 | >0.9999 |
|  |  |  |  |  |  |  |  |  |  |
|  | **Week 9** |  |  |  |  |  |  |  |  |
|  | CD - Control vs. CD - AT | 0.3917 | 0.3920 | -0.0003167 | 6 | 6 | 0.01859 | 372.0 | >0.9999 |
|  | CD - Control vs. WD - Control | 0.3917 | 0.3399 | 0.05178 | 6 | 6 | 3.040 | 372.0 | 0.2642 |
|  | CD - Control vs. WD - AT | 0.3917 | 0.3406 | 0.05108 | 6 | 6 | 2.999 | 372.0 | 0.2788 |
|  | **CD - Control vs. INT - Control** | **0.3917** | **0.2938** | **0.09790** | **6** | **7** | **5.965** | **372.0** | **0.0004** |
|  | **CD - Control vs. INT - AT** | **0.3917** | **0.2954** | **0.09627** | **6** | **6** | **5.652** | **372.0** | **0.0011** |
|  | CD - AT vs. WD - Control | 0.3920 | 0.3399 | 0.05210 | 6 | 6 | 3.059 | 372.0 | 0.2578 |
|  | CD - AT vs. WD - AT | 0.3920 | 0.3406 | 0.05140 | 6 | 6 | 3.018 | 372.0 | 0.2721 |
|  | **CD - AT vs. INT - Control** | **0.3920** | **0.2938** | **0.09821** | **6** | **7** | **5.984** | **372.0** | **0.0004** |
|  | **CD - AT vs. INT - AT** | **0.3920** | **0.2954** | **0.09658** | **6** | **6** | **5.671** | **372.0** | **0.0010** |
|  | WD - Control vs. WD - AT | 0.3399 | 0.3406 | -0.0007000 | 6 | 6 | 0.04110 | 372.0 | >0.9999 |
|  | WD - Control vs. INT - Control | 0.3399 | 0.2938 | 0.04611 | 6 | 7 | 2.810 | 372.0 | 0.3519 |
|  | WD - Control vs. INT - AT | 0.3399 | 0.2954 | 0.04448 | 6 | 6 | 2.612 | 372.0 | 0.4370 |
|  | WD - AT vs. INT - Control | 0.3406 | 0.2938 | 0.04681 | 6 | 7 | 2.852 | 372.0 | 0.3347 |
|  | WD - AT vs. INT - AT | 0.3406 | 0.2954 | 0.04518 | 6 | 6 | 2.653 | 372.0 | 0.4187 |
|  | INT - Control vs. INT - AT | 0.2938 | 0.2954 | -0.001629 | 7 | 6 | 0.09923 | 372.0 | >0.9999 |
|  |  |  |  |  |  |  |  |  |  |
|  | **Week 10** |  |  |  |  |  |  |  |  |
|  | CD - Control vs. CD - AT | 0.3026 | 0.2660 | 0.03653 | 6 | 6 | 2.145 | 372.0 | 0.6537 |
|  | CD - Control vs. WD - Control | 0.3026 | 0.2717 | 0.03085 | 6 | 6 | 1.811 | 372.0 | 0.7955 |
|  | CD - Control vs. WD - AT | 0.3026 | 0.3408 | -0.03818 | 6 | 6 | 2.242 | 372.0 | 0.6088 |
|  | CD - Control vs. INT - Control | 0.3026 | 0.2790 | 0.02357 | 6 | 7 | 1.436 | 372.0 | 0.9127 |
|  | CD - Control vs. INT - AT | 0.3026 | 0.2638 | 0.03877 | 6 | 6 | 2.276 | 372.0 | 0.5928 |
|  | CD - AT vs. WD - Control | 0.2660 | 0.2717 | -0.005683 | 6 | 6 | 0.3337 | 372.0 | 0.9999 |
|  | **CD - AT vs. WD - AT** | **0.2660** | **0.3408** | **-0.07472** | **6** | **6** | **4.387** | **372.0** | **0.0251** |
|  | CD - AT vs. INT - Control | 0.2660 | 0.2790 | -0.01297 | 6 | 7 | 0.7901 | 372.0 | 0.9935 |
|  | CD - AT vs. INT - AT | 0.2660 | 0.2638 | 0.002233 | 6 | 6 | 0.1311 | 372.0 | >0.9999 |
|  | **WD - Control vs. WD - AT** | **0.2717** | **0.3408** | **-0.06903** | **6** | **6** | **4.053** | **372.0** | **0.0498** |
|  | WD - Control vs. INT - Control | 0.2717 | 0.2790 | -0.007283 | 6 | 7 | 0.4438 | 372.0 | 0.9996 |
|  | WD - Control vs. INT - AT | 0.2717 | 0.2638 | 0.007917 | 6 | 6 | 0.4648 | 372.0 | 0.9995 |
|  | WD - AT vs. INT - Control | 0.3408 | 0.2790 | 0.06175 | 6 | 7 | 3.762 | 372.0 | 0.0859 |
|  | **WD - AT vs. INT - AT** | **0.3408** | **0.2638** | **0.07695** | **6** | **6** | **4.518** | **372.0** | **0.0188** |
|  | INT - Control vs. INT - AT | 0.2790 | 0.2638 | 0.01520 | 7 | 6 | 0.9261 | 372.0 | 0.9866 |
|  |  |  |  |  |  |  |  |  |  |
|  | **Week 11** |  |  |  |  |  |  |  |  |
|  | CD - Control vs. CD - AT | 0.3390 | 0.3136 | 0.02542 | 6 | 6 | 1.492 | 372.0 | 0.8986 |
|  | CD - Control vs. WD - Control | 0.3390 | 0.3052 | 0.03383 | 6 | 6 | 1.986 | 372.0 | 0.7243 |
|  | CD - Control vs. WD - AT | 0.3390 | 0.2844 | 0.05465 | 6 | 6 | 3.209 | 372.0 | 0.2096 |
|  | **CD - Control vs. INT - Control** | **0.3390** | **0.2694** | **0.06965** | **6** | **7** | **4.244** | **372.0** | **0.0339** |
|  | **CD - Control vs. INT - AT** | **0.3390** | **0.2635** | **0.07555** | **6** | **6** | **4.436** | **372.0** | **0.0226** |
|  | CD - AT vs. WD - Control | 0.3136 | 0.3052 | 0.008417 | 6 | 6 | 0.4942 | 372.0 | 0.9993 |
|  | CD - AT vs. WD - AT | 0.3136 | 0.2844 | 0.02923 | 6 | 6 | 1.716 | 372.0 | 0.8301 |
|  | CD - AT vs. INT - Control | 0.3136 | 0.2694 | 0.04423 | 6 | 7 | 2.695 | 372.0 | 0.4003 |
|  | CD - AT vs. INT - AT | 0.3136 | 0.2635 | 0.05013 | 6 | 6 | 2.943 | 372.0 | 0.2993 |
|  | WD - Control vs. WD - AT | 0.3052 | 0.2844 | 0.02082 | 6 | 6 | 1.222 | 372.0 | 0.9547 |
|  | WD - Control vs. INT - Control | 0.3052 | 0.2694 | 0.03581 | 6 | 7 | 2.182 | 372.0 | 0.6366 |
|  | WD - Control vs. INT - AT | 0.3052 | 0.2635 | 0.04172 | 6 | 6 | 2.449 | 372.0 | 0.5115 |
|  | WD - AT vs. INT - Control | 0.2844 | 0.2694 | 0.01500 | 6 | 7 | 0.9138 | 372.0 | 0.9874 |
|  | WD - AT vs. INT - AT | 0.2844 | 0.2635 | 0.02090 | 6 | 6 | 1.227 | 372.0 | 0.9539 |
|  | INT - Control vs. INT - AT | 0.2694 | 0.2635 | 0.005902 | 7 | 6 | 0.3596 | 372.0 | 0.9999 |
|  |  |  |  |  |  |  |  |  |  |
|  | **Week 12** |  |  |  |  |  |  |  |  |
|  | CD - Control vs. CD - AT | 0.3683 | 0.3602 | 0.008117 | 6 | 6 | 0.4766 | 372.0 | 0.9994 |
|  | CD - Control vs. WD - Control | 0.3683 | 0.3294 | 0.03885 | 6 | 6 | 2.281 | 372.0 | 0.5905 |
|  | CD - Control vs. WD - AT | 0.3683 | 0.3277 | 0.04053 | 6 | 6 | 2.380 | 372.0 | 0.5441 |
|  | CD - Control vs. INT - Control | 0.3683 | 0.3619 | 0.006338 | 6 | 7 | 0.3862 | 372.0 | 0.9998 |
|  | CD - Control vs. INT - AT | 0.3683 | 0.3359 | 0.03240 | 6 | 6 | 1.902 | 372.0 | 0.7595 |
|  | CD - AT vs. WD - Control | 0.3602 | 0.3294 | 0.03073 | 6 | 6 | 1.804 | 372.0 | 0.7981 |
|  | CD - AT vs. WD - AT | 0.3602 | 0.3277 | 0.03242 | 6 | 6 | 1.903 | 372.0 | 0.7591 |
|  | CD - AT vs. INT - Control | 0.3602 | 0.3619 | -0.001779 | 6 | 7 | 0.1084 | 372.0 | >0.9999 |
|  | CD - AT vs. INT - AT | 0.3602 | 0.3359 | 0.02428 | 6 | 6 | 1.426 | 372.0 | 0.9151 |
|  | WD - Control vs. WD - AT | 0.3294 | 0.3277 | 0.001683 | 6 | 6 | 0.09883 | 372.0 | >0.9999 |
|  | WD - Control vs. INT - Control | 0.3294 | 0.3619 | -0.03251 | 6 | 7 | 1.981 | 372.0 | 0.7266 |
|  | WD - Control vs. INT - AT | 0.3294 | 0.3359 | -0.006450 | 6 | 6 | 0.3787 | 372.0 | 0.9998 |
|  | WD - AT vs. INT - Control | 0.3277 | 0.3619 | -0.03420 | 6 | 7 | 2.083 | 372.0 | 0.6816 |
|  | WD - AT vs. INT - AT | 0.3277 | 0.3359 | -0.008133 | 6 | 6 | 0.4775 | 372.0 | 0.9994 |
|  | INT - Control vs. INT - AT | 0.3619 | 0.3359 | 0.02606 | 7 | 6 | 1.588 | 372.0 | 0.8717 |
|  |  |  |  |  |  |  |  |  |  |

**S Table 13.** Summary of statistics for **Supplemental Figure 6** – CD Caloric Intake during BE cycles.

| **Fig.** | **ANOVA table** | **SS (Type III)** | **DF** | **MS** | **F (DFn, DFd)** | **P value** |
| --- | --- | --- | --- | --- | --- | --- |
| S Fig 6A | Interaction | 0.008302 | 2 | 0.004151 | F (2, 31) = 0.8760 | 0.4265 |
|  | Stress | 0.0007513 | 1 | 0.0007513 | F (1, 31) = 0.1585 | 0.6932 |
|  | **Diet** | **3.381** | **2** | **1.690** | **F (2, 31) = 356.7** | **<0.0001** |
|  | Residual | 0.1469 | 31 | 0.004739 |  |  |

|  | **Test details** | **Mean 1** | **Mean 2** | **Mean diff.** | **N1** | **N2** | **q** | **DF** | **P value** |
| --- | --- | --- | --- | --- | --- | --- | --- | --- | --- |
|  | Control:CD vs. Control:WD | 1.464 | 1.900 | -0.4361 | 6 | 6 | 15.52 | 31.00 | <0.0001 |
|  | Control:CD vs. Control:INT | 1.464 | 1.164 | 0.2997 | 6 | 7 | 11.07 | 31.00 | <0.0001 |
|  | Control:CD vs. Trauma:CD | 1.464 | 1.515 | -0.05168 | 6 | 6 | 1.839 | 31.00 | 0.7826 |
|  | **Control:CD vs. Trauma:WD** | **1.464** | **1.888** | **-0.4247** | **6** | **6** | **15.11** | **31.00** | **<0.0001** |
|  | **Control:CD vs. Trauma:INT** | **1.464** | **1.151** | **0.3129** | **6** | **6** | **11.13** | **31.00** | **<0.0001** |
|  | **Control:WD vs. Control:INT** | **1.900** | **1.164** | **0.7358** | **6** | **7** | **27.17** | **31.00** | **<0.0001** |
|  | **Control:WD vs. Trauma:CD** | **1.900** | **1.515** | **0.3844** | **6** | **6** | **13.68** | **31.00** | **<0.0001** |
|  | Control:WD vs. Trauma:WD | 1.900 | 1.888 | 0.01142 | 6 | 6 | 0.4065 | 31.00 | 0.9997 |
|  | **Control:WD vs. Trauma:INT** | **1.900** | **1.151** | **0.7490** | **6** | **6** | **26.65** | **31.00** | **<0.0001** |
|  | **Control:INT vs. Trauma:CD** | **1.164** | **1.515** | **-0.3514** | **7** | **6** | **12.98** | **31.00** | **<0.0001** |
|  | **Control:INT vs. Trauma:WD** | **1.164** | **1.888** | **-0.7244** | **7** | **6** | **26.75** | **31.00** | **<0.0001** |
|  | Control:INT vs. Trauma:INT | 1.164 | 1.151 | 0.01318 | 7 | 6 | 0.4865 | 31.00 | 0.9993 |
|  | **Trauma:CD vs. Trauma:WD** | **1.515** | **1.888** | **-0.3730** | **6** | **6** | **13.27** | **31.00** | **<0.0001** |
|  | **Trauma:CD vs. Trauma:INT** | **1.515** | **1.151** | **0.3646** | **6** | **6** | **12.97** | **31.00** | **<0.0001** |
|  | **Trauma:WD vs. Trauma:INT** | **1.888** | **1.151** | **0.7375** | **6** | **6** | **26.24** | **31.00** | **<0.0001** |

| **Fig.** | **ANOVA table** | **SS (Type III)** | **DF** | **MS** | **F (DFn, DFd)** | **P value** |
| --- | --- | --- | --- | --- | --- | --- |
| S Fig 6B | **Interaction** | **1.493** | **2** | **0.7465** | **F (2, 35) = 40.68** | **<0.0001** |
|  | **Stress** | **0.7148** | **1** | **0.7148** | **F (1, 35) = 38.95** | **<0.0001** |
|  | **Diet** | **8.430** | **2** | **4.215** | **F (2, 35) = 229.7** | **<0.0001** |
|  | Residual | 0.6422 | 35 | 0.01835 |  |  |

|  | **Test details** | **Mean 1** | **Mean 2** | **Mean diff.** | **N1** | **N2** | **q** | **DF** | **P value** |
| --- | --- | --- | --- | --- | --- | --- | --- | --- | --- |
|  | **Control:CD vs. Control:WD** | **0.8289** | **2.169** | **-1.340** | **7** | **6** | **17.78** | **35.00** | **<0.0001** |
|  | **Control:CD vs. Control:INT** | **0.8289** | **1.128** | **-0.2991** | **7** | **8** | **4.266** | **35.00** | **0.0022** |
|  | **Control:CD vs. Trauma:CD** | **0.8289** | **1.643** | **-0.8141** | **7** | **6** | **10.80** | **35.00** | **<0.0001** |
|  | **Control:CD vs. Trauma:WD** | **0.8289** | **2.162** | **-1.333** | **7** | **6** | **17.69** | **35.00** | **<0.0001** |
|  | **Control:CD vs. Trauma:INT** | **0.8289** | **1.120** | **-0.2910** | **7** | **8** | **4.151** | **35.00** | **0.0030** |
|  | **Control:WD vs. Control:INT** | **2.169** | **1.128** | **1.041** | **6** | **8** | **14.23** | **35.00** | **<0.0001** |
|  | **Control:WD vs. Trauma:CD** | **2.169** | **1.643** | **0.5262** | **6** | **6** | **6.729** | **35.00** | **<0.0001** |
|  | Control:WD vs. Trauma:WD | 2.169 | 2.162 | 0.007130 | 6 | 6 | 0.09117 | 35.00 | >0.9999 |
|  | **Control:WD vs. Trauma:INT** | **2.169** | **1.120** | **1.049** | **6** | **8** | **14.34** | **35.00** | **<0.0001** |
|  | **Control:INT vs. Trauma:CD** | **1.128** | **1.643** | **-0.5150** | **8** | **6** | **7.040** | **35.00** | **<0.0001** |
|  | **Control:INT vs. Trauma:WD** | **1.128** | **2.162** | **-1.034** | **8** | **6** | **14.14** | **35.00** | **<0.0001** |
|  | **Control:INT vs. Trauma:INT** | **1.128** | **1.120** | **0.008107** | **8** | **8** | **0.1197** | **35.00** | **>0.9999** |
|  | **Trauma:CD vs. Trauma:WD** | **1.643** | **2.162** | **-0.5191** | **6** | **6** | **6.637** | **35.00** | **<0.0001** |
|  | **Trauma:CD vs. Trauma:INT** | **1.643** | **1.120** | **0.5231** | **6** | **8** | **7.151** | **35.00** | **<0.0001** |
|  | **Trauma:WD vs. Trauma:INT** | **2.162** | **1.120** | **1.042** | **6** | **8** | **14.25** | **35.00** | **<0.0001** |
|  |  |  |  |  |  |  |  |  |  |

| **Fig.** | **ANOVA table** | **SS (Type III)** | **DF** | **MS** | **F (DFn, DFd)** | **P value** |
| --- | --- | --- | --- | --- | --- | --- |
| S Fig 6C | Interaction | 6.464e-005 | 2 | 3.232e-005 | F (2, 31) = 0.01454 | 0.9856 |
|  | Stress | 0.0001454 | 1 | 0.0001454 | F (1, 31) = 0.06542 | 0.7998 |
|  | **Diet** | **0.2830** | **2** | **0.1415** | **F (2, 31) = 63.66** | **<0.0001** |
|  | Residual | 0.06891 | 31 | 0.002223 |  |  |

|  | **Test details** | **Mean 1** | **Mean 2** | **Mean diff.** | **N1** | **N2** | **q** | **DF** | **P value** |
| --- | --- | --- | --- | --- | --- | --- | --- | --- | --- |
|  | Control:CD vs. Control:WD | 1.488 | 1.563 | -0.07513 | 6 | 6 | 3.903 | 31.00 | 0.0917 |
|  | **Control:CD vs. Control:INT** | **1.488** | **1.351** | **0.1370** | **6** | **7** | **7.385** | **31.00** | **0.0002** |
|  | Control:CD vs. Trauma:CD | 1.488 | 1.490 | -0.001203 | 6 | 6 | 0.06252 | 31.00 | >0.9999 |
|  | Control:CD vs. Trauma:WD | 1.488 | 1.567 | -0.07835 | 6 | 6 | 4.071 | 31.00 | 0.0710 |
|  | **Control:CD vs. Trauma:INT** | **1.488** | **1.359** | **0.1295** | **6** | **6** | **6.728** | **31.00** | **0.0006** |
|  | **Control:WD vs. Control:INT** | **1.563** | **1.351** | **0.2121** | **6** | **7** | **11.44** | **31.00** | **<0.0001** |
|  | Control:WD vs. Trauma:CD | 1.563 | 1.490 | 0.07393 | 6 | 6 | 3.841 | 31.00 | 0.1006 |
|  | Control:WD vs. Trauma:WD | 1.563 | 1.567 | -0.003220 | 6 | 6 | 0.1673 | 31.00 | >0.9999 |
|  | **Control:WD vs. Trauma:INT** | **1.563** | **1.359** | **0.2046** | **6** | **6** | **10.63** | **31.00** | **<0.0001** |
|  | **Control:INT vs. Trauma:CD** | **1.351** | **1.490** | **-0.1382** | **7** | **6** | **7.450** | **31.00** | **0.0001** |
|  | **Control:INT vs. Trauma:WD** | **1.351** | **1.567** | **-0.2153** | **7** | **6** | **11.61** | **31.00** | **<0.0001** |
|  | Control:INT vs. Trauma:INT | 1.351 | 1.359 | -0.007491 | 7 | 6 | 0.4039 | 31.00 | 0.9997 |
|  | Trauma:CD vs. Trauma:WD | 1.490 | 1.567 | -0.07715 | 6 | 6 | 4.008 | 31.00 | 0.0782 |
|  | **Trauma:CD vs. Trauma:INT** | **1.490** | **1.359** | **0.1307** | **6** | **6** | **6.790** | **31.00** | **0.0005** |
|  | **Trauma:WD vs. Trauma:INT** | **1.567** | **1.359** | **0.2078** | **6** | **6** | **10.80** | **31.00** | **<0.0001** |

| **Fig.** | **ANOVA table** | **SS (Type III)** | **DF** | **MS** | **F (DFn, DFd)** | **P value** |
| --- | --- | --- | --- | --- | --- | --- |
| S Fig 6D | **Interaction** | **1.175** | **2** | **0.5876** | **F (2, 35) = 27.15** | **<0.0001** |
|  | **Stress** | **0.5197** | **1** | **0.5197** | **F (1, 35) = 24.01** | **<0.0001** |
|  | **Diet** | **2.209** | **2** | **1.105** | **F (2, 35) = 51.03** | **<0.0001** |
|  | Residual | 0.7576 | 35 | 0.02165 |  |  |

|  | **Test details** | **Mean 1** | **Mean 2** | **Mean diff.** | **N1** | **N2** | **q** | **DF** | **P value** |
| --- | --- | --- | --- | --- | --- | --- | --- | --- | --- |
|  | **Control:CD vs. Control:WD** | **0.7877** | **1.694** | **-0.9065** | **7** | **6** | **11.07** | **35.00** | **<0.0001** |
|  | **Control:CD vs. Control:INT** | **0.7877** | **1.585** | **-0.7970** | **7** | **8** | **10.47** | **35.00** | **<0.0001** |
|  | **Control:CD vs. Trauma:CD** | **0.7877** | **1.494** | **-0.7063** | **7** | **6** | **8.629** | **35.00** | **<0.0001** |
|  | **Control:CD vs. Trauma:WD** | **0.7877** | **1.725** | **-0.9373** | **7** | **6** | **11.45** | **35.00** | **<0.0001** |
|  | **Control:CD vs. Trauma:INT** | **0.7877** | **1.529** | **-0.7410** | **7** | **8** | **9.732** | **35.00** | **<0.0001** |
|  | Control:WD vs. Control:INT | 1.694 | 1.585 | 0.1095 | 6 | 8 | 1.378 | 35.00 | 0.9462 |
|  | Control:WD vs. Trauma:CD | 1.694 | 1.494 | 0.2001 | 6 | 6 | 2.356 | 35.00 | 0.3074 |
|  | Control:WD vs. Trauma:WD | 1.694 | 1.725 | -0.03082 | 6 | 6 | 0.3628 | 35.00 | >0.9999 |
|  | Control:WD vs. Trauma:INT | 1.694 | 1.529 | 0.1655 | 6 | 8 | 2.083 | 35.00 | 0.4960 |
|  | Control:INT vs. Trauma:CD | 1.585 | 1.494 | 0.09067 | 8 | 6 | 1.141 | 35.00 | 0.9894 |
|  | Control:INT vs. Trauma:WD | 1.585 | 1.725 | -0.1403 | 8 | 6 | 1.766 | 35.00 | 0.7412 |
|  | Control:INT vs. Trauma:INT | 1.585 | 1.529 | 0.05600 | 8 | 8 | 0.7613 | 35.00 | 0.9999 |
|  | Trauma:CD vs. Trauma:WD | 1.494 | 1.725 | -0.2310 | 6 | 6 | 2.719 | 35.00 | 0.1415 |
|  | Trauma:CD vs. Trauma:INT | 1.494 | 1.529 | -0.03466 | 6 | 8 | 0.4362 | 35.00 | >0.9999 |
|  | Trauma:WD vs. Trauma:INT | 1.725 | 1.529 | 0.1963 | 6 | 8 | 2.471 | 35.00 | 0.2444 |

| **Fig.** | **ANOVA table** | **SS (Type III)** | **DF** | **MS** | **F (DFn, DFd)** | **P value** |
| --- | --- | --- | --- | --- | --- | --- |
| S Fig 6E | **Interaction** | **0.3657** | **2** | **0.1829** | **F (2, 31) = 7.595** | **0.0021** |
|  | Stress | 0.01213 | 1 | 0.01213 | F (1, 31) = 0.5037 | 0.4832 |
|  | **Diet** | **0.6469** | **2** | **0.3235** | **F (2, 31) = 13.44** | **<0.0001** |
|  | Residual | 0.7463 | 31 | 0.02408 |  |  |

|  | **Test details** | **Mean 1** | **Mean 2** | **Mean diff.** | **N1** | **N2** | **q** | **DF** | **P value** |
| --- | --- | --- | --- | --- | --- | --- | --- | --- | --- |
|  | Control:CD vs. Control:WD | 1.150 | 1.250 | -0.1001 | 6 | 6 | 1.581 | 31.00 | 0.8702 |
|  | Control:CD vs. Control:INT | 1.150 | 1.283 | -0.1336 | 6 | 7 | 2.189 | 31.00 | 0.6370 |
|  | Control:CD vs. Trauma:CD | 1.150 | 1.011 | 0.1388 | 6 | 6 | 2.192 | 31.00 | 0.6361 |
|  | **Control:CD vs. Trauma:WD** | **1.150** | **1.567** | **-0.4177** | **6** | **6** | **6.594** | **31.00** | **0.0007** |
|  | Control:CD vs. Trauma:INT | 1.150 | 1.213 | -0.06373 | 6 | 6 | 1.006 | 31.00 | 0.9791 |
|  | Control:WD vs. Control:INT | 1.250 | 1.283 | -0.03350 | 6 | 7 | 0.5489 | 31.00 | 0.9987 |
|  | Control:WD vs. Trauma:CD | 1.250 | 1.011 | 0.2390 | 6 | 6 | 3.773 | 31.00 | 0.1111 |
|  | **Control:WD vs. Trauma:WD** | **1.250** | **1.567** | **-0.3176** | **6** | **6** | **5.013** | **31.00** | **0.0146** |
|  | Control:WD vs. Trauma:INT | 1.250 | 1.213 | 0.03642 | 6 | 6 | 0.5749 | 31.00 | 0.9984 |
|  | **Control:INT vs. Trauma:CD** | **1.283** | **1.011** | **0.2725** | **7** | **6** | **4.464** | **31.00** | **0.0378** |
|  | **Control:INT vs. Trauma:WD** | **1.283** | **1.567** | **-0.2841** | **7** | **6** | **4.653** | **31.00** | **0.0274** |
|  | Control:INT vs. Trauma:INT | 1.283 | 1.213 | 0.06992 | 7 | 6 | 1.145 | 31.00 | 0.9635 |
|  | **Trauma:CD vs. Trauma:WD** | **1.011** | **1.567** | **-0.5565** | **6** | **6** | **8.786** | **31.00** | **<0.0001** |
|  | Trauma:CD vs. Trauma:INT | 1.011 | 1.213 | -0.2026 | 6 | 6 | 3.198 | 31.00 | 0.2402 |
|  | **Trauma:WD vs. Trauma:INT** | **1.567** | **1.213** | **0.3540** | **6** | **6** | **5.588** | **31.00** | **0.0051** |

| **Fig.** | **ANOVA table** | **SS (Type III)** | **DF** | **MS** | **F (DFn, DFd)** | **P value** |
| --- | --- | --- | --- | --- | --- | --- |
| S Fig 6F | **Interaction** | 0.9048 | 2 | 0.4524 | F (2, 35) = 19.54 | **<0.0001** |
|  | **Stress** | 0.4798 | 1 | 0.4798 | F (1, 35) = 20.72 | **<0.0001** |
|  | **Diet** | 2.381 | 2 | 1.190 | F (2, 35) = 51.42 | **<0.0001** |
|  | Residual | 0.8103 | 35 | 0.02315 |  |  |

|  | **Test details** | **Mean 1** | **Mean 2** | **Mean diff.** | **N1** | **N2** | **q** | **DF** | **P value** |
| --- | --- | --- | --- | --- | --- | --- | --- | --- | --- |
|  | **Control:CD vs. Control:WD** | **0.7459** | **1.664** | **-0.9183** | **7** | **6** | **15.34** | **35.00** | **<0.0001** |
|  | **Control:CD vs. Control:INT** | **0.7459** | **1.497** | **-0.7511** | **7** | **8** | **13.49** | **35.00** | **<0.0001** |
|  | **Control:CD vs. Trauma:CD** | **0.7459** | **1.392** | **-0.6461** | **7** | **6** | **10.79** | **35.00** | **<0.0001** |
|  | **Control:CD vs. Trauma:WD** | **0.7459** | **1.643** | **-0.8973** | **7** | **6** | **14.99** | **35.00** | **<0.0001** |
|  | **Control:CD vs. Trauma:INT** | **0.7459** | **1.526** | **-0.7805** | **7** | **8** | **14.02** | **35.00** | **<0.0001** |
|  | Control:WD vs. Control:INT | 1.664 | 1.497 | 0.1672 | 6 | 8 | 2.877 | 35.00 | 0.3442 |
|  | **Control:WD vs. Trauma:CD** | **1.664** | **1.392** | **0.2722** | **6** | **6** | **4.382** | **35.00** | **0.0409** |
|  | Control:WD vs. Trauma:WD | 1.664 | 1.643 | 0.02093 | 6 | 6 | 0.3369 | 35.00 | 0.9999 |
|  | Control:WD vs. Trauma:INT | 1.664 | 1.526 | 0.1378 | 6 | 8 | 2.372 | 35.00 | 0.5554 |
|  | Control:INT vs. Trauma:CD | 1.497 | 1.392 | 0.1050 | 8 | 6 | 1.807 | 35.00 | 0.7948 |
|  | Control:INT vs. Trauma:WD | 1.497 | 1.643 | -0.1463 | 8 | 6 | 2.517 | 35.00 | 0.4912 |
|  | Control:INT vs. Trauma:INT | 1.497 | 1.526 | -0.02938 | 8 | 8 | 0.5462 | 35.00 | 0.9988 |
|  | Trauma:CD vs. Trauma:WD | 1.392 | 1.643 | -0.2513 | 6 | 6 | 4.045 | 35.00 | 0.0710 |
|  | Trauma:CD vs. Trauma:INT | 1.392 | 1.526 | -0.1344 | 6 | 8 | 2.313 | 35.00 | 0.5816 |
|  | Trauma:WD vs. Trauma:INT | 1.643 | 1.526 | 0.1169 | 6 | 8 | 2.011 | 35.00 | 0.7136 |

| **Fig.** | **ANOVA table** | **SS (Type III)** | **DF** | **MS** | **F (DFn, DFd)** | **P value** |
| --- | --- | --- | --- | --- | --- | --- |
| S Fig 6G | Interaction | 0.01000 | 2 | 0.005002 | F (2, 31) = 0.7157 | 0.4968 |
|  | **Stress** | **0.04935** | **1** | **0.04935** | **F (1, 31) = 7.060** | **0.0123** |
|  | **Diet** | **0.1248** | **2** | **0.06241** | **F (2, 31) = 8.929** | **0.0009** |
|  | Residual | 0.2167 | 31 | 0.006990 |  |  |

|  | **Test details** | **Mean 1** | **Mean 2** | **Mean diff.** | **N1** | **N2** | **q** | **DF** | **P value** |
| --- | --- | --- | --- | --- | --- | --- | --- | --- | --- |
|  | Control:CD vs. Control:WD | 1.288 | 1.404 | -0.1156 | 6 | 6 | 3.387 | 31.00 | 0.1892 |
|  | Control:CD vs. Control:INT | 1.288 | 1.239 | 0.04915 | 6 | 7 | 1.494 | 31.00 | 0.8945 |
|  | Control:CD vs. Trauma:CD | 1.288 | 1.192 | 0.09658 | 6 | 6 | 2.830 | 31.00 | 0.3647 |
|  | Control:CD vs. Trauma:WD | 1.288 | 1.308 | -0.01984 | 6 | 6 | 0.5812 | 31.00 | 0.9983 |
|  | Control:CD vs. Trauma:INT | 1.288 | 1.212 | 0.07630 | 6 | 6 | 2.236 | 31.00 | 0.6167 |
|  | **Control:WD vs. Control:INT** | **1.404** | **1.239** | **0.1647** | **6** | **7** | **5.009** | **31.00** | **0.0148** |
|  | **Control:WD vs. Trauma:CD** | **1.404** | **1.192** | **0.2122** | **6** | **6** | **6.216** | **31.00** | **0.0015** |
|  | Control:WD vs. Trauma:WD | 1.404 | 1.308 | 0.09576 | 6 | 6 | 2.806 | 31.00 | 0.3740 |
|  | **Control:WD vs. Trauma:INT** | **1.404** | **1.212** | **0.1919** | **6** | **6** | **5.622** | **31.00** | **0.0048** |
|  | Control:INT vs. Trauma:CD | 1.239 | 1.192 | 0.04743 | 7 | 6 | 1.442 | 31.00 | 0.9078 |
|  | Control:INT vs. Trauma:WD | 1.239 | 1.308 | -0.06899 | 7 | 6 | 2.098 | 31.00 | 0.6770 |
|  | Control:INT vs. Trauma:INT | 1.239 | 1.212 | 0.02715 | 7 | 6 | 0.8255 | 31.00 | 0.9914 |
|  | Trauma:CD vs. Trauma:WD | 1.192 | 1.308 | -0.1164 | 6 | 6 | 3.411 | 31.00 | 0.1833 |
|  | Trauma:CD vs. Trauma:INT | 1.192 | 1.212 | -0.02028 | 6 | 6 | 0.5942 | 31.00 | 0.9982 |
|  | Trauma:WD vs. Trauma:INT | 1.308 | 1.212 | 0.09614 | 6 | 6 | 2.817 | 31.00 | 0.3697 |

| **Fig.** | **ANOVA table** | **SS (Type III)** | **DF** | **MS** | **F (DFn, DFd)** | **P value** |
| --- | --- | --- | --- | --- | --- | --- |
| S Fig 6H | **Interaction** | 1.125 | 2 | 0.5625 | F (2, 35) = 26.65 | **<0.0001** |
|  | **Stress** | 0.5614 | 1 | 0.5614 | F (1, 35) = 26.60 | **<0.0001** |
|  | **Diet** | 1.758 | 2 | 0.8792 | F (2, 35) = 41.65 | **<0.0001** |
|  | Residual | 0.7388 | 35 | 0.02111 |  |  |

|  | **Test details** | **Mean 1** | **Mean 2** | **Mean diff.** | **N1** | **N2** | **q** | **DF** | **P value** |
| --- | --- | --- | --- | --- | --- | --- | --- | --- | --- |
|  | **Control:CD vs. Control:WD** | **0.8429** | **1.730** | **-0.8874** | **7** | **6** | **15.53** | **35.00** | **<0.0001** |
|  | **Control:CD vs. Control:INT** | **0.8429** | **1.463** | **-0.6201** | **7** | **8** | **11.66** | **35.00** | **<0.0001** |
|  | **Control:CD vs. Trauma:CD** | **0.8429** | **1.554** | **-0.7114** | **7** | **6** | **12.45** | **35.00** | **<0.0001** |
|  | **Control:CD vs. Trauma:WD** | **0.8429** | **1.730** | **-0.8871** | **7** | **6** | **15.52** | **35.00** | **<0.0001** |
|  | **Control:CD vs. Trauma:INT** | **0.8429** | **1.460** | **-0.6170** | **7** | **8** | **11.60** | **35.00** | **<0.0001** |
|  | **Control:WD vs. Control:INT** | **1.730** | **1.463** | **0.2673** | **6** | **8** | **4.817** | **35.00** | **0.0191** |
|  | Control:WD vs. Trauma:CD | 1.730 | 1.554 | 0.1760 | 6 | 6 | 2.967 | 35.00 | 0.3118 |
|  | Control:WD vs. Trauma:WD | 1.730 | 1.730 | 0.0003067 | 6 | 6 | 0.0052 | 35.00 | >0.9999 |
|  | **Control:WD vs. Trauma:INT** | **1.730** | **1.460** | **0.2704** | **6** | **8** | **4.874** | **35.00** | **0.0172** |
|  | Control:INT vs. Trauma:CD | 1.463 | 1.554 | -0.09130 | 8 | 6 | 1.646 | 35.00 | 0.8508 |
|  | **Control:INT vs. Trauma:WD** | **1.463** | **1.730** | **-0.2670** | **8** | **6** | **4.812** | **35.00** | **0.0193** |
|  | Control:INT vs. Trauma:INT | 1.463 | 1.460 | 0.003162 | 8 | 8 | 0.0616 | 35.00 | >0.9999 |
|  | Trauma:CD vs. Trauma:WD | 1.554 | 1.730 | -0.1757 | 6 | 6 | 2.962 | 35.00 | 0.3136 |
|  | Trauma:CD vs. Trauma:INT | 1.554 | 1.460 | 0.09446 | 6 | 8 | 1.703 | 35.00 | 0.8320 |
|  | **Trauma:WD vs. Trauma:INT** | **1.730** | **1.460** | **0.2701** | **6** | **8** | **4.869** | **35.00** | **0.0174** |

**S Table 14.** Summary of statistics for **Supplemental Figure 7** – Longitudinal body weight.

| **Fig.** | **ANOVA table** | **SS (Type III)** | **DF** | **MS** | **F (DFn, DFd)** | **P value** |
| --- | --- | --- | --- | --- | --- | --- |
| S Fig 7A - | **Interaction** | **7558** | **60** | **126.0** | **F (60, 455) = 1.685** | **0.0018** |
| Females | **Stress** | **1946247** | **12** | **162187** | **F (12, 455) = 2170** | **<0.0001** |
|  | **Diet** | **4486** | **5** | **897.2** | **F (5, 455) = 12.00** | **<0.0001** |
|  | Residual | 34014 | 455 | 74.76 |  |  |

|  | **Test details** | **Mean 1** | **Mean 2** | **Mean diff.** | **N1** | **N2** | **q** | **DF** | **P value** |
| --- | --- | --- | --- | --- | --- | --- | --- | --- | --- |
|  | **Week 0** |  |  |  |  |  |  |  |  |
|  | Control + CD vs. AT + CD | 42.94 | 43.23 | -0.2905 | 7 | 6 | 0.0854 | 455.0 | >0.9999 |
|  | Control + CD vs. Control + WD | 42.94 | 41.03 | 1.910 | 7 | 6 | 0.5614 | 455.0 | 0.9987 |
|  | Control + CD vs. AT + WD | 42.94 | 41.70 | 1.243 | 7 | 6 | 0.3654 | 455.0 | 0.9998 |
|  | Control + CD vs. Control + INT | 42.94 | 41.80 | 1.143 | 7 | 8 | 0.3612 | 455.0 | 0.9999 |
|  | Control + CD vs. AT + INT | 42.94 | 40.93 | 2.018 | 7 | 8 | 0.6377 | 455.0 | 0.9976 |
|  | AT + CD vs. Control + WD | 43.23 | 41.03 | 2.200 | 6 | 6 | 0.6233 | 455.0 | 0.9979 |
|  | AT + CD vs. AT + WD | 43.23 | 41.70 | 1.533 | 6 | 6 | 0.4344 | 455.0 | 0.9996 |
|  | AT + CD vs. Control + INT | 43.23 | 41.80 | 1.433 | 6 | 8 | 0.4341 | 455.0 | 0.9996 |
|  | AT + CD vs. AT + INT | 43.23 | 40.93 | 2.308 | 6 | 8 | 0.6991 | 455.0 | 0.9964 |
|  | Control + WD vs. AT + WD | 41.03 | 41.70 | -0.6667 | 6 | 6 | 0.1889 | 455.0 | >0.9999 |
|  | Control + WD vs. Control + INT | 41.03 | 41.80 | -0.7667 | 6 | 8 | 0.2322 | 455.0 | >0.9999 |
|  | Control + WD vs. AT + INT | 41.03 | 40.93 | 0.1083 | 6 | 8 | 0.0328 | 455.0 | >0.9999 |
|  | AT + WD vs. Control + INT | 41.70 | 41.80 | -0.1000 | 6 | 8 | 0.0303 | 455.0 | >0.9999 |
|  | AT + WD vs. AT + INT | 41.70 | 40.93 | 0.7750 | 6 | 8 | 0.2347 | 455.0 | >0.9999 |
|  | Control + INT vs. AT + INT | 41.80 | 40.93 | 0.8750 | 8 | 8 | 0.2862 | 455.0 | >0.9999 |
|  |  |  |  |  |  |  |  |  |  |
|  | **Week 1** |  |  |  |  |  |  |  |  |
|  | Control + CD vs. AT + CD | 76.86 | 71.60 | 5.257 | 7 | 6 | 1.546 | 455.0 | 0.8841 |
|  | Control + CD vs. Control + WD | 76.86 | 71.93 | 4.924 | 7 | 6 | 1.448 | 455.0 | 0.9099 |
|  | Control + CD vs. AT + WD | 76.86 | 71.50 | 5.357 | 7 | 6 | 1.575 | 455.0 | 0.8757 |
|  | Control + CD vs. Control + INT | 76.86 | 71.70 | 5.157 | 7 | 8 | 1.630 | 455.0 | 0.8589 |
|  | Control + CD vs. AT + INT | 76.86 | 71.70 | 5.157 | 7 | 8 | 1.630 | 455.0 | 0.8589 |
|  | AT + CD vs. Control + WD | 71.60 | 71.93 | -0.3333 | 6 | 6 | 0.0944 | 455.0 | >0.9999 |
|  | AT + CD vs. AT + WD | 71.60 | 71.50 | 0.1000 | 6 | 6 | 0.0283 | 455.0 | >0.9999 |
|  | AT + CD vs. Control + INT | 71.60 | 71.70 | -0.1000 | 6 | 8 | 0.0303 | 455.0 | >0.9999 |
|  | AT + CD vs. AT + INT | 71.60 | 71.70 | -0.1000 | 6 | 8 | 0.0303 | 455.0 | >0.9999 |
|  | Control + WD vs. AT + WD | 71.93 | 71.50 | 0.4333 | 6 | 6 | 0.1228 | 455.0 | >0.9999 |
|  | Control + WD vs. Control + INT | 71.93 | 71.70 | 0.2333 | 6 | 8 | 0.0707 | 455.0 | >0.9999 |
|  | Control + WD vs. AT + INT | 71.93 | 71.70 | 0.2333 | 6 | 8 | 0.0707 | 455.0 | >0.9999 |
|  | AT + WD vs. Control + INT | 71.50 | 71.70 | -0.2000 | 6 | 8 | 0.0606 | 455.0 | >0.9999 |
|  | AT + WD vs. AT + INT | 71.50 | 71.70 | -0.2000 | 6 | 8 | 0.0606 | 455.0 | >0.9999 |
|  | Control + INT vs. AT + INT | 71.70 | 71.70 | 0.000 | 8 | 8 | 0.000 | 455.0 | >0.9999 |
|  |  |  |  |  |  |  |  |  |  |
|  | **Week 2** |  |  |  |  |  |  |  |  |
|  | Control + CD vs. AT + CD | 111.1 | 109.8 | 1.376 | 7 | 6 | 0.4046 | 455.0 | 0.9997 |
|  | Control + CD vs. Control + WD | 111.1 | 106.6 | 4.510 | 7 | 6 | 1.326 | 455.0 | 0.9366 |
|  | Control + CD vs. AT + WD | 111.1 | 109.2 | 1.943 | 7 | 6 | 0.5712 | 455.0 | 0.9986 |
|  | Control + CD vs. Control + INT | 111.1 | 109.4 | 1.743 | 7 | 8 | 0.5508 | 455.0 | 0.9988 |
|  | Control + CD vs. AT + INT | 111.1 | 107.5 | 3.618 | 7 | 8 | 1.143 | 455.0 | 0.9659 |
|  | AT + CD vs. Control + WD | 109.8 | 106.6 | 3.133 | 6 | 6 | 0.8877 | 455.0 | 0.9889 |
|  | AT + CD vs. AT + WD | 109.8 | 109.2 | 0.5667 | 6 | 6 | 0.1605 | 455.0 | >0.9999 |
|  | AT + CD vs. Control + INT | 109.8 | 109.4 | 0.3667 | 6 | 8 | 0.1111 | 455.0 | >0.9999 |
|  | AT + CD vs. AT + INT | 109.8 | 107.5 | 2.242 | 6 | 8 | 0.6789 | 455.0 | 0.9968 |
|  | Control + WD vs. AT + WD | 106.6 | 109.2 | -2.567 | 6 | 6 | 0.7272 | 455.0 | 0.9956 |
|  | Control + WD vs. Control + INT | 106.6 | 109.4 | -2.767 | 6 | 8 | 0.8379 | 455.0 | 0.9915 |
|  | Control + WD vs. AT + INT | 106.6 | 107.5 | -0.8917 | 6 | 8 | 0.2701 | 455.0 | >0.9999 |
|  | AT + WD vs. Control + INT | 109.2 | 109.4 | -0.2000 | 6 | 8 | 0.0606 | 455.0 | >0.9999 |
|  | AT + WD vs. AT + INT | 109.2 | 107.5 | 1.675 | 6 | 8 | 0.5073 | 455.0 | 0.9992 |
|  | Control + INT vs. AT + INT | 109.4 | 107.5 | 1.875 | 8 | 8 | 0.6134 | 455.0 | 0.9980 |
|  |  |  |  |  |  |  |  |  |  |
|  | **Week 3** |  |  |  |  |  |  |  |  |
|  | Control + CD vs. AT + CD | 139.8 | 135.8 | 3.967 | 7 | 6 | 1.166 | 455.0 | 0.9629 |
|  | Control + CD vs. Control + WD | 139.8 | 135.6 | 4.233 | 7 | 6 | 1.245 | 455.0 | 0.9512 |
|  | Control + CD vs. AT + WD | 139.8 | 141.4 | -1.600 | 7 | 6 | 0.4704 | 455.0 | 0.9995 |
|  | Control + CD vs. Control + INT | 139.8 | 139.1 | 0.7250 | 7 | 8 | 0.2291 | 455.0 | >0.9999 |
|  | Control + CD vs. AT + INT | 139.8 | 138.3 | 1.525 | 7 | 8 | 0.4820 | 455.0 | 0.9994 |
|  | AT + CD vs. Control + WD | 135.8 | 135.6 | 0.2667 | 6 | 6 | 0.0756 | 455.0 | >0.9999 |
|  | AT + CD vs. AT + WD | 135.8 | 141.4 | -5.567 | 6 | 6 | 1.577 | 455.0 | 0.8750 |
|  | AT + CD vs. Control + INT | 135.8 | 139.1 | -3.242 | 6 | 8 | 0.9818 | 455.0 | 0.9826 |
|  | AT + CD vs. AT + INT | 135.8 | 138.3 | -2.442 | 6 | 8 | 0.7395 | 455.0 | 0.9953 |
|  | Control + WD vs. AT + WD | 135.6 | 141.4 | -5.833 | 6 | 6 | 1.653 | 455.0 | 0.8516 |
|  | Control + WD vs. Control + INT | 135.6 | 139.1 | -3.508 | 6 | 8 | 1.063 | 455.0 | 0.9752 |
|  | Control + WD vs. AT + INT | 135.6 | 138.3 | -2.708 | 6 | 8 | 0.8203 | 455.0 | 0.9923 |
|  | AT + WD vs. Control + INT | 141.4 | 139.1 | 2.325 | 6 | 8 | 0.7042 | 455.0 | 0.9962 |
|  | AT + WD vs. AT + INT | 141.4 | 138.3 | 3.125 | 6 | 8 | 0.9465 | 455.0 | 0.9852 |
|  | Control + INT vs. AT + INT | 139.1 | 138.3 | 0.8000 | 8 | 8 | 0.2617 | 455.0 | >0.9999 |
|  |  |  |  |  |  |  |  |  |  |
|  | **Week 4** |  |  |  |  |  |  |  |  |
|  | Control + CD vs. AT + CD | 158.4 | 159.4 | -1.000 | 7 | 6 | 0.2940 | 455.0 | >0.9999 |
|  | Control + CD vs. Control + WD | 158.4 | 159.0 | -0.5667 | 7 | 6 | 0.1666 | 455.0 | >0.9999 |
|  | Control + CD vs. AT + WD | 158.4 | 162.2 | -3.800 | 7 | 6 | 1.117 | 455.0 | 0.9692 |
|  | Control + CD vs. Control + INT | 158.4 | 160.4 | -1.975 | 7 | 8 | 0.6242 | 455.0 | 0.9979 |
|  | Control + CD vs. AT + INT | 158.4 | 158.5 | -0.1250 | 7 | 8 | 0.0395 | 455.0 | >0.9999 |
|  | AT + CD vs. Control + WD | 159.4 | 159.0 | 0.4333 | 6 | 6 | 0.1228 | 455.0 | >0.9999 |
|  | AT + CD vs. AT + WD | 159.4 | 162.2 | -2.800 | 6 | 6 | 0.7933 | 455.0 | 0.9934 |
|  | AT + CD vs. Control + INT | 159.4 | 160.4 | -0.9750 | 6 | 8 | 0.2953 | 455.0 | >0.9999 |
|  | AT + CD vs. AT + INT | 159.4 | 158.5 | 0.8750 | 6 | 8 | 0.2650 | 455.0 | >0.9999 |
|  | Control + WD vs. AT + WD | 159.0 | 162.2 | -3.233 | 6 | 6 | 0.9160 | 455.0 | 0.9872 |
|  | Control + WD vs. Control + INT | 159.0 | 160.4 | -1.408 | 6 | 8 | 0.4265 | 455.0 | 0.9997 |
|  | Control + WD vs. AT + INT | 159.0 | 158.5 | 0.4417 | 6 | 8 | 0.1338 | 455.0 | >0.9999 |
|  | AT + WD vs. Control + INT | 162.2 | 160.4 | 1.825 | 6 | 8 | 0.5527 | 455.0 | 0.9988 |
|  | AT + WD vs. AT + INT | 162.2 | 158.5 | 3.675 | 6 | 8 | 1.113 | 455.0 | 0.9697 |
|  | Control + INT vs. AT + INT | 160.4 | 158.5 | 1.850 | 8 | 8 | 0.6052 | 455.0 | 0.9982 |
|  |  |  |  |  |  |  |  |  |  |
|  | **Week 5** |  |  |  |  |  |  |  |  |
|  | Control + CD vs. AT + CD | 171.1 | 174.8 | -3.657 | 7 | 6 | 1.075 | 455.0 | 0.9739 |
|  | Control + CD vs. Control + WD | 171.1 | 175.7 | -4.557 | 7 | 6 | 1.340 | 455.0 | 0.9338 |
|  | Control + CD vs. AT + WD | 171.1 | 175.4 | -4.224 | 7 | 6 | 1.242 | 455.0 | 0.9516 |
|  | Control + CD vs. Control + INT | 171.1 | 176.6 | -5.482 | 7 | 8 | 1.733 | 455.0 | 0.8245 |
|  | Control + CD vs. AT + INT | 171.1 | 175.8 | -4.657 | 7 | 8 | 1.472 | 455.0 | 0.9039 |
|  | AT + CD vs. Control + WD | 174.8 | 175.7 | -0.9000 | 6 | 6 | 0.2550 | 455.0 | >0.9999 |
|  | AT + CD vs. AT + WD | 174.8 | 175.4 | -0.5667 | 6 | 6 | 0.1605 | 455.0 | >0.9999 |
|  | AT + CD vs. Control + INT | 174.8 | 176.6 | -1.825 | 6 | 8 | 0.5527 | 455.0 | 0.9988 |
|  | AT + CD vs. AT + INT | 174.8 | 175.8 | -1.000 | 6 | 8 | 0.3029 | 455.0 | >0.9999 |
|  | Control + WD vs. AT + WD | 175.7 | 175.4 | 0.3333 | 6 | 6 | 0.0944 | 455.0 | >0.9999 |
|  | Control + WD vs. Control + INT | 175.7 | 176.6 | -0.9250 | 6 | 8 | 0.2802 | 455.0 | >0.9999 |
|  | Control + WD vs. AT + INT | 175.7 | 175.8 | -0.1000 | 6 | 8 | 0.0303 | 455.0 | >0.9999 |
|  | AT + WD vs. Control + INT | 175.4 | 176.6 | -1.258 | 6 | 8 | 0.3811 | 455.0 | 0.9998 |
|  | AT + WD vs. AT + INT | 175.4 | 175.8 | -0.4333 | 6 | 8 | 0.1312 | 455.0 | >0.9999 |
|  | Control + INT vs. AT + INT | 176.6 | 175.8 | 0.8250 | 8 | 8 | 0.2699 | 455.0 | >0.9999 |
|  |  |  |  |  |  |  |  |  |  |
|  | **Week 6** |  |  |  |  |  |  |  |  |
|  | Control + CD vs. AT + CD | 183.3 | 187.4 | -4.057 | 7 | 6 | 1.193 | 455.0 | 0.9592 |
|  | Control + CD vs. Control + WD | 183.3 | 186.3 | -2.957 | 7 | 6 | 0.8694 | 455.0 | 0.9899 |
|  | Control + CD vs. AT + WD | 183.3 | 186.3 | -2.957 | 7 | 6 | 0.8694 | 455.0 | 0.9899 |
|  | Control + CD vs. Control + INT | 183.3 | 187.4 | -4.082 | 7 | 8 | 1.290 | 455.0 | 0.9433 |
|  | Control + CD vs. AT + INT | 183.3 | 189.6 | -6.257 | 7 | 8 | 1.978 | 455.0 | 0.7281 |
|  | AT + CD vs. Control + WD | 187.4 | 186.3 | 1.100 | 6 | 6 | 0.3116 | 455.0 | >0.9999 |
|  | AT + CD vs. AT + WD | 187.4 | 186.3 | 1.100 | 6 | 6 | 0.3116 | 455.0 | >0.9999 |
|  | AT + CD vs. Control + INT | 187.4 | 187.4 | -0.0250 | 6 | 8 | 0.0076 | 455.0 | >0.9999 |
|  | AT + CD vs. AT + INT | 187.4 | 189.6 | -2.200 | 6 | 8 | 0.6663 | 455.0 | 0.9971 |
|  | Control + WD vs. AT + WD | 186.3 | 186.3 | 0.000 | 6 | 6 | 0.000 | 455.0 | >0.9999 |
|  | Control + WD vs. Control + INT | 186.3 | 187.4 | -1.125 | 6 | 8 | 0.3407 | 455.0 | 0.9999 |
|  | Control + WD vs. AT + INT | 186.3 | 189.6 | -3.300 | 6 | 8 | 0.9995 | 455.0 | 0.9811 |
|  | AT + WD vs. Control + INT | 186.3 | 187.4 | -1.125 | 6 | 8 | 0.3407 | 455.0 | 0.9999 |
|  | AT + WD vs. AT + INT | 186.3 | 189.6 | -3.300 | 6 | 8 | 0.9995 | 455.0 | 0.9811 |
|  | Control + INT vs. AT + INT | 187.4 | 189.6 | -2.175 | 8 | 8 | 0.7115 | 455.0 | 0.9960 |
|  |  |  |  |  |  |  |  |  |  |
|  | **Week 7** |  |  |  |  |  |  |  |  |
|  | Control + CD vs. AT + CD | 194.9 | 199.3 | -4.352 | 7 | 6 | 1.280 | 455.0 | 0.9452 |
|  | Control + CD vs. Control + WD | 194.9 | 201.0 | -6.052 | 7 | 6 | 1.779 | 455.0 | 0.8075 |
|  | Control + CD vs. AT + WD | 194.9 | 200.0 | -5.086 | 7 | 6 | 1.495 | 455.0 | 0.8979 |
|  | Control + CD vs. Control + INT | 194.9 | 199.5 | -4.586 | 7 | 8 | 1.449 | 455.0 | 0.9095 |
|  | Control + CD vs. AT + INT | 194.9 | 198.3 | -3.361 | 7 | 8 | 1.062 | 455.0 | 0.9753 |
|  | AT + CD vs. Control + WD | 199.3 | 201.0 | -1.700 | 6 | 6 | 0.4816 | 455.0 | 0.9994 |
|  | AT + CD vs. AT + WD | 199.3 | 200.0 | -0.7333 | 6 | 6 | 0.2078 | 455.0 | >0.9999 |
|  | AT + CD vs. Control + INT | 199.3 | 199.5 | -0.2333 | 6 | 8 | 0.0707 | 455.0 | >0.9999 |
|  | AT + CD vs. AT + INT | 199.3 | 198.3 | 0.9917 | 6 | 8 | 0.3003 | 455.0 | >0.9999 |
|  | Control + WD vs. AT + WD | 201.0 | 200.0 | 0.9667 | 6 | 6 | 0.2739 | 455.0 | >0.9999 |
|  | Control + WD vs. Control + INT | 201.0 | 199.5 | 1.467 | 6 | 8 | 0.4442 | 455.0 | 0.9996 |
|  | Control + WD vs. AT + INT | 201.0 | 198.3 | 2.692 | 6 | 8 | 0.8152 | 455.0 | 0.9925 |
|  | AT + WD vs. Control + INT | 200.0 | 199.5 | 0.5000 | 6 | 8 | 0.1514 | 455.0 | >0.9999 |
|  | AT + WD vs. AT + INT | 200.0 | 198.3 | 1.725 | 6 | 8 | 0.5224 | 455.0 | 0.9991 |
|  | Control + INT vs. AT + INT | 199.5 | 198.3 | 1.225 | 8 | 8 | 0.4007 | 455.0 | 0.9998 |
|  |  |  |  |  |  |  |  |  |  |
|  | **Week 8** |  |  |  |  |  |  |  |  |
|  | Control + CD vs. AT + CD | 202.5 | 210.1 | -7.581 | 7 | 6 | 2.229 | 455.0 | 0.6149 |
|  | **Control + CD vs. Control + WD** | **202.5** | **216.9** | **-14.38** | **7** | **6** | **4.228** | **455.0** | **0.0347** |
|  | **Control + CD vs. AT + WD** | **202.5** | **219.0** | **-16.51** | **7** | **6** | **4.855** | **455.0** | **0.0085** |
|  | Control + CD vs. Control + INT | 202.5 | 210.7 | -8.189 | 7 | 8 | 2.588 | 455.0 | 0.4474 |
|  | Control + CD vs. AT + INT | 202.5 | 210.3 | -7.764 | 7 | 8 | 2.454 | 455.0 | 0.5092 |
|  | AT + CD vs. Control + WD | 210.1 | 216.9 | -6.800 | 6 | 6 | 1.926 | 455.0 | 0.7496 |
|  | AT + CD vs. AT + WD | 210.1 | 219.0 | -8.933 | 6 | 6 | 2.531 | 455.0 | 0.4735 |
|  | AT + CD vs. Control + INT | 210.1 | 210.7 | -0.6083 | 6 | 8 | 0.1842 | 455.0 | >0.9999 |
|  | AT + CD vs. AT + INT | 210.1 | 210.3 | -0.1833 | 6 | 8 | 0.0555 | 455.0 | >0.9999 |
|  | Control + WD vs. AT + WD | 216.9 | 219.0 | -2.133 | 6 | 6 | 0.6044 | 455.0 | 0.9982 |
|  | Control + WD vs. Control + INT | 216.9 | 210.7 | 6.192 | 6 | 8 | 1.875 | 455.0 | 0.7705 |
|  | Control + WD vs. AT + INT | 216.9 | 210.3 | 6.617 | 6 | 8 | 2.004 | 455.0 | 0.7167 |
|  | AT + WD vs. Control + INT | 219.0 | 210.7 | 8.325 | 6 | 8 | 2.521 | 455.0 | 0.4779 |
|  | AT + WD vs. AT + INT | 219.0 | 210.3 | 8.750 | 6 | 8 | 2.650 | 455.0 | 0.4196 |
|  | Control + INT vs. AT + INT | 210.7 | 210.3 | 0.4250 | 8 | 8 | 0.1390 | 455.0 | >0.9999 |
|  |  |  |  |  |  |  |  |  |  |
|  | **Week 9** |  |  |  |  |  |  |  |  |
|  | Control + CD vs. AT + CD | 211.0 | 217.9 | -6.905 | 7 | 6 | 2.030 | 455.0 | 0.7053 |
|  | **Control + CD vs. Control + WD** | **211.0** | **226.6** | **-15.57** | **7** | **6** | **4.578** | **455.0** | **0.0163** |
|  | **Control + CD vs. AT + WD** | **211.0** | **233.7** | **-22.70** | **7** | **6** | **6.675** | **455.0** | **<0.0001** |
|  | Control + CD vs. Control + INT | 211.0 | 217.7 | -6.646 | 7 | 8 | 2.101 | 455.0 | 0.6739 |
|  | Control + CD vs. AT + INT | 211.0 | 217.4 | -6.346 | 7 | 8 | 2.006 | 455.0 | 0.7159 |
|  | AT + CD vs. Control + WD | 217.9 | 226.6 | -8.667 | 6 | 6 | 2.455 | 455.0 | 0.5085 |
|  | **AT + CD vs. AT + WD** | **217.9** | **233.7** | **-15.80** | **6** | **6** | **4.476** | **455.0** | **0.0204** |
|  | AT + CD vs. Control + INT | 217.9 | 217.7 | 0.2583 | 6 | 8 | 0.0782 | 455.0 | >0.9999 |
|  | AT + CD vs. AT + INT | 217.9 | 217.4 | 0.5583 | 6 | 8 | 0.1691 | 455.0 | >0.9999 |
|  | Control + WD vs. AT + WD | 226.6 | 233.7 | -7.133 | 6 | 6 | 2.021 | 455.0 | 0.7093 |
|  | Control + WD vs. Control + INT | 226.6 | 217.7 | 8.925 | 6 | 8 | 2.703 | 455.0 | 0.3964 |
|  | Control + WD vs. AT + INT | 226.6 | 217.4 | 9.225 | 6 | 8 | 2.794 | 455.0 | 0.3580 |
|  | **AT + WD vs. Control + INT** | **233.7** | **217.7** | **16.06** | **6** | **8** | **4.864** | **455.0** | **0.0083** |
|  | **AT + WD vs. AT + INT** | **233.7** | **217.4** | **16.36** | **6** | **8** | **4.954** | **455.0** | **0.0067** |
|  | Control + INT vs. AT + INT | 217.7 | 217.4 | 0.3000 | 8 | 8 | 0.09814 | 455.0 | >0.9999 |
|  |  |  |  |  |  |  |  |  |  |
|  | **Week 10** |  |  |  |  |  |  |  |  |
|  | Control + CD vs. AT + CD | 219.1 | 225.4 | -6.290 | 7 | 6 | 1.849 | 455.0 | 0.7808 |
|  | **Control + CD vs. Control + WD** | **219.1** | **236.1** | **-16.92** | **7** | **6** | **4.976** | **455.0** | **0.0063** |
|  | **Control + CD vs. AT + WD** | **219.1** | **242.1** | **-22.99** | **7** | **6** | **6.759** | **455.0** | **<0.0001** |
|  | Control + CD vs. Control + INT | 219.1 | 226.8 | -7.657 | 7 | 8 | 2.420 | 455.0 | 0.5251 |
|  | Control + CD vs. AT + INT | 219.1 | 224.5 | -5.332 | 7 | 8 | 1.685 | 455.0 | 0.8408 |
|  | AT + CD vs. Control + WD | 225.4 | 236.1 | -10.63 | 6 | 6 | 3.012 | 455.0 | 0.2736 |
|  | **AT + CD vs. AT + WD** | **225.4** | **242.1** | **-16.70** | **6** | **6** | **4.731** | **455.0** | **0.0114** |
|  | AT + CD vs. Control + INT | 225.4 | 226.8 | -1.367 | 6 | 8 | 0.4139 | 455.0 | 0.9997 |
|  | AT + CD vs. AT + INT | 225.4 | 224.5 | 0.9583 | 6 | 8 | 0.2902 | 455.0 | >0.9999 |
|  | Control + WD vs. AT + WD | 236.1 | 242.1 | -6.067 | 6 | 6 | 1.719 | 455.0 | 0.8293 |
|  | Control + WD vs. Control + INT | 236.1 | 226.8 | 9.267 | 6 | 8 | 2.807 | 455.0 | 0.3528 |
|  | Control + WD vs. AT + INT | 236.1 | 224.5 | 11.59 | 6 | 8 | 3.511 | 455.0 | 0.1315 |
|  | **AT + WD vs. Control + INT** | **242.1** | **226.8** | **15.33** | **6** | **8** | **4.644** | **455.0** | **0.0140** |
|  | **AT + WD vs. AT + INT** | **242.1** | **224.5** | **17.66** | **6** | **8** | **5.348** | **455.0** | **0.0024** |
|  | Control + INT vs. AT + INT | 226.8 | 224.5 | 2.325 | 8 | 8 | 0.7606 | 455.0 | 0.9946 |
|  |  |  |  |  |  |  |  |  |  |
|  | **Week 11** |  |  |  |  |  |  |  |  |
|  | Control + CD vs. AT + CD | 226.5 | 231.6 | -5.052 | 7 | 6 | 1.485 | 455.0 | 0.9004 |
|  | Control + CD vs. Control + WD | 226.5 | 238.6 | -12.12 | 7 | 6 | 3.563 | 455.0 | 0.1206 |
|  | **Control + CD vs. AT + WD** | **226.5** | **249.7** | **-23.15** | **7** | **6** | **6.807** | **455.0** | **<0.0001** |
|  | Control + CD vs. Control + INT | 226.5 | 234.6 | -8.061 | 7 | 8 | 2.548 | 455.0 | 0.4659 |
|  | Control + CD vs. AT + INT | 226.5 | 230.1 | -3.586 | 7 | 8 | 1.133 | 455.0 | 0.9672 |
|  | AT + CD vs. Control + WD | 231.6 | 238.6 | -7.067 | 6 | 6 | 2.002 | 455.0 | 0.7175 |
|  | **AT + CD vs. AT + WD** | **231.6** | **249.7** | **-18.10** | **6** | **6** | **5.128** | **455.0** | **0.0043** |
|  | AT + CD vs. Control + INT | 231.6 | 234.6 | -3.008 | 6 | 8 | 0.9111 | 455.0 | 0.9875 |
|  | AT + CD vs. AT + INT | 231.6 | 230.1 | 1.467 | 6 | 8 | 0.4442 | 455.0 | 0.9996 |
|  | Control + WD vs. AT + WD | 238.6 | 249.7 | -11.03 | 6 | 6 | 3.126 | 455.0 | 0.2350 |
|  | Control + WD vs. Control + INT | 238.6 | 234.6 | 4.058 | 6 | 8 | 1.229 | 455.0 | 0.9537 |
|  | Control + WD vs. AT + INT | 238.6 | 230.1 | 8.533 | 6 | 8 | 2.584 | 455.0 | 0.4490 |
|  | **AT + WD vs. Control + INT** | **249.7** | **234.6** | **15.09** | **6** | **8** | **4.571** | **455.0** | **0.0165** |
|  | **AT + WD vs. AT + INT** | **249.7** | **230.1** | **19.57** | **6** | **8** | **5.926** | **455.0** | **0.0005** |
|  | Control + INT vs. AT + INT | 234.6 | 230.1 | 4.475 | 8 | 8 | 1.464 | 455.0 | 0.9059 |
|  |  |  |  |  |  |  |  |  |  |
|  | **Week 12** |  |  |  |  |  |  |  |  |
|  | Control + CD vs. AT + CD | 224.6 | 230.4 | -5.829 | 7 | 6 | 1.714 | 455.0 | 0.8311 |
|  | **Control + CD vs. Control + WD** | **224.6** | **242.9** | **-18.36** | **7** | **6** | **5.398** | **455.0** | **0.0021** |
|  | **Control + CD vs. AT + WD** | **224.6** | **253.4** | **-28.80** | **7** | **6** | **8.466** | **455.0** | **<0.0001** |
|  | Control + CD vs. Control + INT | 224.6 | 235.7 | -11.15 | 7 | 8 | 3.525 | 455.0 | 0.1284 |
|  | Control + CD vs. AT + INT | 224.6 | 229.8 | -5.179 | 7 | 8 | 1.637 | 455.0 | 0.8568 |
|  | AT + CD vs. Control + WD | 230.4 | 242.9 | -12.53 | 6 | 6 | 3.551 | 455.0 | 0.1231 |
|  | **AT + CD vs. AT + WD** | **230.4** | **253.4** | **-22.97** | **6** | **6** | **6.507** | **455.0** | **<0.0001** |
|  | AT + CD vs. Control + INT | 230.4 | 235.7 | -5.325 | 6 | 8 | 1.613 | 455.0 | 0.8642 |
|  | AT + CD vs. AT + INT | 230.4 | 229.8 | 0.6500 | 6 | 8 | 0.1969 | 455.0 | >0.9999 |
|  | Control + WD vs. AT + WD | 242.9 | 253.4 | -10.43 | 6 | 6 | 2.956 | 455.0 | 0.2943 |
|  | Control + WD vs. Control + INT | 242.9 | 235.7 | 7.208 | 6 | 8 | 2.183 | 455.0 | 0.6361 |
|  | Control + WD vs. AT + INT | 242.9 | 229.8 | 13.18 | 6 | 8 | 3.993 | 455.0 | 0.0556 |
|  | **AT + WD vs. Control + INT** | **253.4** | **235.7** | **17.64** | **6** | **8** | **5.343** | **455.0** | **0.0025** |
|  | **AT + WD vs. AT + INT** | **253.4** | **229.8** | **23.62** | **6** | **8** | **7.153** | **455.0** | **<0.0001** |
|  | Control + INT vs. AT + INT | 235.7 | 229.8 | 5.975 | 8 | 8 | 1.955 | 455.0 | 0.7378 |
|  |  |  |  |  |  |  |  |  |  |

| **Fig.** | **ANOVA table** | **SS (Type III)** | **DF** | **MS** | **F (DFn, DFd)** | **P value** |
| --- | --- | --- | --- | --- | --- | --- |
| S Fig 7B - | **Interaction** | **21894** | **60** | **364.9** | **F (60, 403) = 2.825** | **<0.0001** |
| Males | **Stress** | **7085271** | **12** | **590439** | **F (12, 403) = 4571** | **<0.0001** |
|  | **Diet** | **28814** | **5** | **5763** | **F (5, 403) = 44.61** | **<0.0001** |
|  | Residual | 52056 | 403 | 129.2 |  |  |

|  | **Test details** | **Mean 1** | **Mean 2** | **Mean diff.** | **N1** | **N2** | **q** | **DF** | **P value** |
| --- | --- | --- | --- | --- | --- | --- | --- | --- | --- |
|  | **Week 0** |  |  |  |  |  |  |  |  |
|  | Control + CD vs. AT + CD | 41.40 | 41.30 | 0.1000 | 6 | 6 | 0.02155 | 403.0 | >0.9999 |
|  | Control + CD vs. Control + WD | 41.40 | 48.03 | -6.633 | 6 | 6 | 1.430 | 403.0 | 0.9142 |
|  | Control + CD vs. AT + WD | 41.40 | 45.47 | -4.067 | 6 | 6 | 0.8765 | 403.0 | 0.9896 |
|  | Control + CD vs. Control + INT | 41.40 | 46.83 | -5.429 | 6 | 7 | 1.214 | 403.0 | 0.9560 |
|  | Control + CD vs. AT + INT | 41.40 | 52.37 | -10.97 | 6 | 6 | 2.364 | 403.0 | 0.5516 |
|  | AT + CD vs. Control + WD | 41.30 | 48.03 | -6.733 | 6 | 6 | 1.451 | 403.0 | 0.9090 |
|  | AT + CD vs. AT + WD | 41.30 | 45.47 | -4.167 | 6 | 6 | 0.8980 | 403.0 | 0.9883 |
|  | AT + CD vs. Control + INT | 41.30 | 46.83 | -5.529 | 6 | 7 | 1.237 | 403.0 | 0.9525 |
|  | AT + CD vs. AT + INT | 41.30 | 52.37 | -11.07 | 6 | 6 | 2.385 | 403.0 | 0.5415 |
|  | Control + WD vs. AT + WD | 48.03 | 45.47 | 2.567 | 6 | 6 | 0.5532 | 403.0 | 0.9988 |
|  | Control + WD vs. Control + INT | 48.03 | 46.83 | 1.205 | 6 | 7 | 0.2695 | 403.0 | >0.9999 |
|  | Control + WD vs. AT + INT | 48.03 | 52.37 | -4.333 | 6 | 6 | 0.9339 | 403.0 | 0.9861 |
|  | AT + WD vs. Control + INT | 45.47 | 46.83 | -1.362 | 6 | 7 | 0.3046 | 403.0 | >0.9999 |
|  | AT + WD vs. AT + INT | 45.47 | 52.37 | -6.900 | 6 | 6 | 1.487 | 403.0 | 0.9000 |
|  | Control + INT vs. AT + INT | 46.83 | 52.37 | -5.538 | 7 | 6 | 1.239 | 403.0 | 0.9521 |
|  |  |  |  |  |  |  |  |  |  |
|  | **Week 1** |  |  |  |  |  |  |  |  |
|  | Control + CD vs. AT + CD | 80.77 | 77.03 | 3.733 | 6 | 6 | 0.8046 | 403.0 | 0.9930 |
|  | Control + CD vs. Control + WD | 80.77 | 84.10 | -3.333 | 6 | 6 | 0.7184 | 403.0 | 0.9959 |
|  | Control + CD vs. AT + WD | 80.77 | 79.90 | 0.8667 | 6 | 6 | 0.1868 | 403.0 | >0.9999 |
|  | Control + CD vs. Control + INT | 80.77 | 80.40 | 0.3667 | 6 | 7 | 0.08201 | 403.0 | >0.9999 |
|  | Control + CD vs. AT + INT | 80.77 | 86.70 | -5.933 | 6 | 6 | 1.279 | 403.0 | 0.9453 |
|  | AT + CD vs. Control + WD | 77.03 | 84.10 | -7.067 | 6 | 6 | 1.523 | 403.0 | 0.8904 |
|  | AT + CD vs. AT + WD | 77.03 | 79.90 | -2.867 | 6 | 6 | 0.6178 | 403.0 | 0.9980 |
|  | AT + CD vs. Control + INT | 77.03 | 80.40 | -3.367 | 6 | 7 | 0.7530 | 403.0 | 0.9948 |
|  | AT + CD vs. AT + INT | 77.03 | 86.70 | -9.667 | 6 | 6 | 2.083 | 403.0 | 0.6816 |
|  | Control + WD vs. AT + WD | 84.10 | 79.90 | 4.200 | 6 | 6 | 0.9052 | 403.0 | 0.9879 |
|  | Control + WD vs. Control + INT | 84.10 | 80.40 | 3.700 | 6 | 7 | 0.8275 | 403.0 | 0.9920 |
|  | Control + WD vs. AT + INT | 84.10 | 86.70 | -2.600 | 6 | 6 | 0.5604 | 403.0 | 0.9987 |
|  | AT + WD vs. Control + INT | 79.90 | 80.40 | -0.5000 | 6 | 7 | 0.1118 | 403.0 | >0.9999 |
|  | AT + WD vs. AT + INT | 79.90 | 86.70 | -6.800 | 6 | 6 | 1.466 | 403.0 | 0.9055 |
|  | Control + INT vs. AT + INT | 80.40 | 86.70 | -6.300 | 7 | 6 | 1.409 | 403.0 | 0.9190 |
|  |  |  |  |  |  |  |  |  |  |
|  | **Week 2** |  |  |  |  |  |  |  |  |
|  | Control + CD vs. AT + CD | 123.9 | 122.0 | 1.833 | 6 | 6 | 0.3951 | 403.0 | 0.9998 |
|  | Control + CD vs. Control + WD | 123.9 | 129.9 | -6.000 | 6 | 6 | 1.293 | 403.0 | 0.9427 |
|  | Control + CD vs. AT + WD | 123.9 | 126.9 | -3.000 | 6 | 6 | 0.6466 | 403.0 | 0.9975 |
|  | Control + CD vs. Control + INT | 123.9 | 127.1 | -3.219 | 6 | 7 | 0.7200 | 403.0 | 0.9958 |
|  | Control + CD vs. AT + INT | 123.9 | 134.5 | -10.63 | 6 | 6 | 2.292 | 403.0 | 0.5854 |
|  | AT + CD vs. Control + WD | 122.0 | 129.9 | -7.833 | 6 | 6 | 1.688 | 403.0 | 0.8398 |
|  | AT + CD vs. AT + WD | 122.0 | 126.9 | -4.833 | 6 | 6 | 1.042 | 403.0 | 0.9773 |
|  | AT + CD vs. Control + INT | 122.0 | 127.1 | -5.052 | 6 | 7 | 1.130 | 403.0 | 0.9676 |
|  | AT + CD vs. AT + INT | 122.0 | 134.5 | -12.47 | 6 | 6 | 2.687 | 403.0 | 0.4037 |
|  | Control + WD vs. AT + WD | 129.9 | 126.9 | 3.000 | 6 | 6 | 0.6466 | 403.0 | 0.9975 |
|  | Control + WD vs. Control + INT | 129.9 | 127.1 | 2.781 | 6 | 7 | 0.6220 | 403.0 | 0.9979 |
|  | Control + WD vs. AT + INT | 129.9 | 134.5 | -4.633 | 6 | 6 | 0.9986 | 403.0 | 0.9812 |
|  | AT + WD vs. Control + INT | 126.9 | 127.1 | -0.2190 | 6 | 7 | 0.04899 | 403.0 | >0.9999 |
|  | AT + WD vs. AT + INT | 126.9 | 134.5 | -7.633 | 6 | 6 | 1.645 | 403.0 | 0.8540 |
|  | Control + INT vs. AT + INT | 127.1 | 134.5 | -7.414 | 7 | 6 | 1.658 | 403.0 | 0.8497 |
|  |  |  |  |  |  |  |  |  |  |
|  | **Week 3** |  |  |  |  |  |  |  |  |
|  | Control + CD vs. AT + CD | 167.3 | 162.8 | 4.467 | 6 | 6 | 0.9627 | 403.0 | 0.9840 |
|  | Control + CD vs. Control + WD | 167.3 | 172.4 | -5.100 | 6 | 6 | 1.099 | 403.0 | 0.9712 |
|  | Control + CD vs. AT + WD | 167.3 | 165.4 | 1.867 | 6 | 6 | 0.4023 | 403.0 | 0.9997 |
|  | Control + CD vs. Control + INT | 167.3 | 168.1 | -0.7571 | 6 | 7 | 0.1693 | 403.0 | >0.9999 |
|  | Control + CD vs. AT + INT | 167.3 | 170.4 | -3.133 | 6 | 6 | 0.6753 | 403.0 | 0.9969 |
|  | AT + CD vs. Control + WD | 162.8 | 172.4 | -9.567 | 6 | 6 | 2.062 | 403.0 | 0.6913 |
|  | AT + CD vs. AT + WD | 162.8 | 165.4 | -2.600 | 6 | 6 | 0.5604 | 403.0 | 0.9987 |
|  | AT + CD vs. Control + INT | 162.8 | 168.1 | -5.224 | 6 | 7 | 1.168 | 403.0 | 0.9626 |
|  | AT + CD vs. AT + INT | 162.8 | 170.4 | -7.600 | 6 | 6 | 1.638 | 403.0 | 0.8563 |
|  | Control + WD vs. AT + WD | 172.4 | 165.4 | 6.967 | 6 | 6 | 1.501 | 403.0 | 0.8962 |
|  | Control + WD vs. Control + INT | 172.4 | 168.1 | 4.343 | 6 | 7 | 0.9713 | 403.0 | 0.9834 |
|  | Control + WD vs. AT + INT | 172.4 | 170.4 | 1.967 | 6 | 6 | 0.4239 | 403.0 | 0.9997 |
|  | AT + WD vs. Control + INT | 165.4 | 168.1 | -2.624 | 6 | 7 | 0.5868 | 403.0 | 0.9984 |
|  | AT + WD vs. AT + INT | 165.4 | 170.4 | -5.000 | 6 | 6 | 1.078 | 403.0 | 0.9736 |
|  | Control + INT vs. AT + INT | 168.1 | 170.4 | -2.376 | 7 | 6 | 0.5315 | 403.0 | 0.9990 |
|  |  |  |  |  |  |  |  |  |  |
|  | **Week 4** |  |  |  |  |  |  |  |  |
|  | Control + CD vs. AT + CD | 209.4 | 205.8 | 3.667 | 6 | 6 | 0.7902 | 403.0 | 0.9935 |
|  | Control + CD vs. Control + WD | 209.4 | 217.8 | -8.400 | 6 | 6 | 1.810 | 403.0 | 0.7958 |
|  | Control + CD vs. AT + WD | 209.4 | 211.9 | -2.433 | 6 | 6 | 0.5244 | 403.0 | 0.9991 |
|  | Control + CD vs. Control + INT | 209.4 | 213.6 | -4.195 | 6 | 7 | 0.9383 | 403.0 | 0.9858 |
|  | Control + CD vs. AT + INT | 209.4 | 220.7 | -11.28 | 6 | 6 | 2.432 | 403.0 | 0.5196 |
|  | AT + CD vs. Control + WD | 205.8 | 217.8 | -12.07 | 6 | 6 | 2.601 | 403.0 | 0.4419 |
|  | AT + CD vs. AT + WD | 205.8 | 211.9 | -6.100 | 6 | 6 | 1.315 | 403.0 | 0.9387 |
|  | AT + CD vs. Control + INT | 205.8 | 213.6 | -7.862 | 6 | 7 | 1.758 | 403.0 | 0.8152 |
|  | AT + CD vs. AT + INT | 205.8 | 220.7 | -14.95 | 6 | 6 | 3.222 | 403.0 | 0.2053 |
|  | Control + WD vs. AT + WD | 217.8 | 211.9 | 5.967 | 6 | 6 | 1.286 | 403.0 | 0.9440 |
|  | Control + WD vs. Control + INT | 217.8 | 213.6 | 4.205 | 6 | 7 | 0.9404 | 403.0 | 0.9856 |
|  | Control + WD vs. AT + INT | 217.8 | 220.7 | -2.883 | 6 | 6 | 0.6214 | 403.0 | 0.9979 |
|  | AT + WD vs. Control + INT | 211.9 | 213.6 | -1.762 | 6 | 7 | 0.3941 | 403.0 | 0.9998 |
|  | AT + WD vs. AT + INT | 211.9 | 220.7 | -8.850 | 6 | 6 | 1.907 | 403.0 | 0.7575 |
|  | Control + INT vs. AT + INT | 213.6 | 220.7 | -7.088 | 7 | 6 | 1.585 | 403.0 | 0.8726 |
|  |  |  |  |  |  |  |  |  |  |
|  | **Week 5** |  |  |  |  |  |  |  |  |
|  | Control + CD vs. AT + CD | 249.4 | 244.5 | 4.900 | 6 | 6 | 1.056 | 403.0 | 0.9759 |
|  | Control + CD vs. Control + WD | 249.4 | 257.8 | -8.467 | 6 | 6 | 1.825 | 403.0 | 0.7903 |
|  | Control + CD vs. AT + WD | 249.4 | 245.9 | 3.500 | 6 | 6 | 0.7543 | 403.0 | 0.9948 |
|  | Control + CD vs. Control + INT | 249.4 | 252.5 | -3.176 | 6 | 7 | 0.7104 | 403.0 | 0.9961 |
|  | Control + CD vs. AT + INT | 249.4 | 264.3 | -14.90 | 6 | 6 | 3.211 | 403.0 | 0.2086 |
|  | AT + CD vs. Control + WD | 244.5 | 257.8 | -13.37 | 6 | 6 | 2.881 | 403.0 | 0.3232 |
|  | AT + CD vs. AT + WD | 244.5 | 245.9 | -1.400 | 6 | 6 | 0.3017 | 403.0 | >0.9999 |
|  | AT + CD vs. Control + INT | 244.5 | 252.5 | -8.076 | 6 | 7 | 1.806 | 403.0 | 0.7974 |
|  | **AT + CD vs. AT + INT** | **244.5** | **264.3** | **-19.80** | **6** | **6** | **4.267** | **403.0** | **0.0322** |
|  | Control + WD vs. AT + WD | 257.8 | 245.9 | 11.97 | 6 | 6 | 2.579 | 403.0 | 0.4516 |
|  | Control + WD vs. Control + INT | 257.8 | 252.5 | 5.290 | 6 | 7 | 1.183 | 403.0 | 0.9605 |
|  | Control + WD vs. AT + INT | 257.8 | 264.3 | -6.433 | 6 | 6 | 1.387 | 403.0 | 0.9240 |
|  | AT + WD vs. Control + INT | 245.9 | 252.5 | -6.676 | 6 | 7 | 1.493 | 403.0 | 0.8984 |
|  | AT + WD vs. AT + INT | 245.9 | 264.3 | -18.40 | 6 | 6 | 3.966 | 403.0 | 0.0588 |
|  | Control + INT vs. AT + INT | 252.5 | 264.3 | -11.72 | 7 | 6 | 2.622 | 403.0 | 0.4322 |
|  |  |  |  |  |  |  |  |  |  |
|  | **Week 6** |  |  |  |  |  |  |  |  |
|  | Control + CD vs. AT + CD | 271.0 | 267.3 | 3.667 | 6 | 6 | 0.7902 | 403.0 | 0.9935 |
|  | Control + CD vs. Control + WD | 271.0 | 275.0 | -4.000 | 6 | 6 | 0.8621 | 403.0 | 0.9903 |
|  | Control + CD vs. AT + WD | 271.0 | 264.7 | 6.333 | 6 | 6 | 1.365 | 403.0 | 0.9286 |
|  | Control + CD vs. Control + INT | 271.0 | 274.3 | -3.286 | 6 | 7 | 0.7349 | 403.0 | 0.9954 |
|  | Control + CD vs. AT + INT | 271.0 | 284.7 | -13.67 | 6 | 6 | 2.945 | 403.0 | 0.2984 |
|  | AT + CD vs. Control + WD | 267.3 | 275.0 | -7.667 | 6 | 6 | 1.652 | 403.0 | 0.8517 |
|  | AT + CD vs. AT + WD | 267.3 | 264.7 | 2.667 | 6 | 6 | 0.5747 | 403.0 | 0.9986 |
|  | AT + CD vs. Control + INT | 267.3 | 274.3 | -6.952 | 6 | 7 | 1.555 | 403.0 | 0.8814 |
|  | AT + CD vs. AT + INT | 267.3 | 284.7 | -17.33 | 6 | 6 | 3.736 | 403.0 | 0.0898 |
|  | Control + WD vs. AT + WD | 275.0 | 264.7 | 10.33 | 6 | 6 | 2.227 | 403.0 | 0.6157 |
|  | Control + WD vs. Control + INT | 275.0 | 274.3 | 0.7143 | 6 | 7 | 0.1598 | 403.0 | >0.9999 |
|  | Control + WD vs. AT + INT | 275.0 | 284.7 | -9.667 | 6 | 6 | 2.083 | 403.0 | 0.6816 |
|  | AT + WD vs. Control + INT | 264.7 | 274.3 | -9.619 | 6 | 7 | 2.151 | 403.0 | 0.6508 |
|  | **AT + WD vs. AT + INT** | **264.7** | **284.7** | **-20.00** | **6** | **6** | **4.310** | **403.0** | **0.0294** |
|  | Control + INT vs. AT + INT | 274.3 | 284.7 | -10.38 | 7 | 6 | 2.322 | 403.0 | 0.5713 |
|  |  |  |  |  |  |  |  |  |  |
|  | **Week 7** |  |  |  |  |  |  |  |  |
|  | Control + CD vs. AT + CD | 308.7 | 303.3 | 5.333 | 6 | 6 | 1.149 | 403.0 | 0.9651 |
|  | Control + CD vs. Control + WD | 308.7 | 312.0 | -3.333 | 6 | 6 | 0.7184 | 403.0 | 0.9959 |
|  | Control + CD vs. AT + WD | 308.7 | 301.7 | 7.000 | 6 | 6 | 1.509 | 403.0 | 0.8943 |
|  | Control + CD vs. Control + INT | 308.7 | 309.4 | -0.7619 | 6 | 7 | 0.1704 | 403.0 | >0.9999 |
|  | Control + CD vs. AT + INT | 308.7 | 325.3 | -16.67 | 6 | 6 | 3.592 | 403.0 | 0.1151 |
|  | AT + CD vs. Control + WD | 303.3 | 312.0 | -8.667 | 6 | 6 | 1.868 | 403.0 | 0.7734 |
|  | AT + CD vs. AT + WD | 303.3 | 301.7 | 1.667 | 6 | 6 | 0.3592 | 403.0 | 0.9999 |
|  | AT + CD vs. Control + INT | 303.3 | 309.4 | -6.095 | 6 | 7 | 1.363 | 403.0 | 0.9290 |
|  | **AT + CD vs. AT + INT** | **303.3** | **325.3** | **-22.00** | **6** | **6** | **4.741** | **403.0** | **0.0112** |
|  | Control + WD vs. AT + WD | 312.0 | 301.7 | 10.33 | 6 | 6 | 2.227 | 403.0 | 0.6157 |
|  | Control + WD vs. Control + INT | 312.0 | 309.4 | 2.571 | 6 | 7 | 0.5751 | 403.0 | 0.9986 |
|  | Control + WD vs. AT + INT | 312.0 | 325.3 | -13.33 | 6 | 6 | 2.874 | 403.0 | 0.3260 |
|  | AT + WD vs. Control + INT | 301.7 | 309.4 | -7.762 | 6 | 7 | 1.736 | 403.0 | 0.8232 |
|  | **AT + WD vs. AT + INT** | **301.7** | **325.3** | **-23.67** | **6** | **6** | **5.101** | **403.0** | **0.0047** |
|  | Control + INT vs. AT + INT | 309.4 | 325.3 | -15.90 | 7 | 6 | 3.557 | 403.0 | 0.1220 |
|  |  |  |  |  |  |  |  |  |  |
|  | **Week 8** |  |  |  |  |  |  |  |  |
|  | Control + CD vs. AT + CD | 329.7 | 326.7 | 3.000 | 6 | 6 | 0.6466 | 403.0 | 0.9975 |
|  | **Control + CD vs. Control + WD** | **329.7** | **352.7** | **-23.00** | **6** | **6** | **4.957** | **403.0** | **0.0067** |
|  | Control + CD vs. AT + WD | 329.7 | 340.3 | -10.67 | 6 | 6 | 2.299 | 403.0 | 0.5821 |
|  | Control + CD vs. Control + INT | 329.7 | 336.0 | -6.333 | 6 | 7 | 1.417 | 403.0 | 0.9173 |
|  | **Control + CD vs. AT + INT** | **329.7** | **351.7** | **-22.00** | **6** | **6** | **4.741** | **403.0** | **0.0112** |
|  | **AT + CD vs. Control + WD** | **326.7** | **352.7** | **-26.00** | **6** | **6** | **5.604** | **403.0** | **0.0012** |
|  | AT + CD vs. AT + WD | 326.7 | 340.3 | -13.67 | 6 | 6 | 2.945 | 403.0 | 0.2984 |
|  | AT + CD vs. Control + INT | 326.7 | 336.0 | -9.333 | 6 | 7 | 2.087 | 403.0 | 0.6798 |
|  | **AT + CD vs. AT + INT** | **326.7** | **351.7** | **-25.00** | **6** | **6** | **5.388** | **403.0** | **0.0022** |
|  | Control + WD vs. AT + WD | 352.7 | 340.3 | 12.33 | 6 | 6 | 2.658 | 403.0 | 0.4163 |
|  | Control + WD vs. Control + INT | 352.7 | 336.0 | 16.67 | 6 | 7 | 3.728 | 403.0 | 0.0911 |
|  | Control + WD vs. AT + INT | 352.7 | 351.7 | 1.000 | 6 | 6 | 0.2155 | 403.0 | >0.9999 |
|  | AT + WD vs. Control + INT | 340.3 | 336.0 | 4.333 | 6 | 7 | 0.9692 | 403.0 | 0.9835 |
|  | AT + WD vs. AT + INT | 340.3 | 351.7 | -11.33 | 6 | 6 | 2.443 | 403.0 | 0.5146 |
|  | Control + INT vs. AT + INT | 336.0 | 351.7 | -15.67 | 7 | 6 | 3.504 | 403.0 | 0.1332 |
|  |  |  |  |  |  |  |  |  |  |
|  | **Week 9** |  |  |  |  |  |  |  |  |
|  | Control + CD vs. AT + CD | 357.3 | 351.0 | 6.333 | 6 | 6 | 1.365 | 403.0 | 0.9286 |
|  | **Control + CD vs. Control + WD** | **357.3** | **386.3** | **-29.00** | **6** | **6** | **6.250** | **403.0** | **0.0002** |
|  | Control + CD vs. AT + WD | 357.3 | 372.0 | -14.67 | 6 | 6 | 3.161 | 403.0 | 0.2240 |
|  | Control + CD vs. Control + INT | 357.3 | 360.9 | -3.524 | 6 | 7 | 0.7881 | 403.0 | 0.9936 |
|  | **Control + CD vs. AT + INT** | **357.3** | **378.0** | **-20.67** | **6** | **6** | **4.454** | **403.0** | **0.0216** |
|  | **AT + CD vs. Control + WD** | **351.0** | **386.3** | **-35.33** | **6** | **6** | **7.615** | **403.0** | **<0.0001** |
|  | **AT + CD vs. AT + WD** | **351.0** | **372.0** | **-21.00** | **6** | **6** | **4.526** | **403.0** | **0.0184** |
|  | AT + CD vs. Control + INT | 351.0 | 360.9 | -9.857 | 6 | 7 | 2.205 | 403.0 | 0.6262 |
|  | **AT + CD vs. AT + INT** | **351.0** | **378.0** | **-27.00** | **6** | **6** | **5.819** | **403.0** | **0.0007** |
|  | Control + WD vs. AT + WD | 386.3 | 372.0 | 14.33 | 6 | 6 | 3.089 | 403.0 | 0.2473 |
|  | **Control + WD vs. Control + INT** | **386.3** | **360.9** | **25.48** | **6** | **7** | **5.698** | **403.0** | **0.0009** |
|  | Control + WD vs. AT + INT | 386.3 | 378.0 | 8.333 | 6 | 6 | 1.796 | 403.0 | 0.8013 |
|  | AT + WD vs. Control + INT | 372.0 | 360.9 | 11.14 | 6 | 7 | 2.492 | 403.0 | 0.4915 |
|  | AT + WD vs. AT + INT | 372.0 | 378.0 | -6.000 | 6 | 6 | 1.293 | 403.0 | 0.9427 |
|  | Control + INT vs. AT + INT | 360.9 | 378.0 | -17.14 | 7 | 6 | 3.834 | 403.0 | 0.0752 |
|  |  |  |  |  |  |  |  |  |  |
|  | **Week 10** |  |  |  |  |  |  |  |  |
|  | Control + CD vs. AT + CD | 373.7 | 370.3 | 3.333 | 6 | 6 | 0.7184 | 403.0 | 0.9959 |
|  | **Control + CD vs. Control + WD** | **373.7** | **414.3** | **-40.67** | **6** | **6** | **8.765** | **403.0** | **<0.0001** |
|  | **Control + CD vs. AT + WD** | **373.7** | **396.7** | **-23.00** | **6** | **6** | **4.957** | **403.0** | **0.0067** |
|  | Control + CD vs. Control + INT | 373.7 | 385.4 | -11.76 | 6 | 7 | 2.631 | 403.0 | 0.4284 |
|  | **Control + CD vs. AT + INT** | **373.7** | **403.0** | **-29.33** | **6** | **6** | **6.322** | **403.0** | **0.0001** |
|  | **AT + CD vs. Control + WD** | **370.3** | **414.3** | **-44.00** | **6** | **6** | **9.483** | **403.0** | **<0.0001** |
|  | **AT + CD vs. AT + WD** | **370.3** | **396.7** | **-26.33** | **6** | **6** | **5.675** | **403.0** | **0.0010** |
|  | AT + CD vs. Control + INT | 370.3 | 385.4 | -15.10 | 6 | 7 | 3.376 | 403.0 | 0.1631 |
|  | **AT + CD vs. AT + INT** | **370.3** | **403.0** | **-32.67** | **6** | **6** | **7.040** | **403.0** | **<0.0001** |
|  | Control + WD vs. AT + WD | 414.3 | 396.7 | 17.67 | 6 | 6 | 3.808 | 403.0 | 0.0790 |
|  | **Control + WD vs. Control + INT** | **414.3** | **385.4** | **28.90** | **6** | **7** | **6.465** | **403.0** | **<0.0001** |
|  | Control + WD vs. AT + INT | 414.3 | 403.0 | 11.33 | 6 | 6 | 2.443 | 403.0 | 0.5146 |
|  | AT + WD vs. Control + INT | 396.7 | 385.4 | 11.24 | 6 | 7 | 2.513 | 403.0 | 0.4816 |
|  | AT + WD vs. AT + INT | 396.7 | 403.0 | -6.333 | 6 | 6 | 1.365 | 403.0 | 0.9286 |
|  | Control + INT vs. AT + INT | 385.4 | 403.0 | -17.57 | 7 | 6 | 3.930 | 403.0 | 0.0629 |
|  |  |  |  |  |  |  |  |  |  |
|  | **Week 11** |  |  |  |  |  |  |  |  |
|  | Control + CD vs. AT + CD | 389.3 | 388.7 | 0.6667 | 6 | 6 | 0.1437 | 403.0 | >0.9999 |
|  | **Control + CD vs. Control + WD** | **389.3** | **435.3** | **-46.00** | **6** | **6** | **9.914** | **403.0** | **<0.0001** |
|  | **Control + CD vs. AT + WD** | **389.3** | **418.7** | **-29.33** | **6** | **6** | **6.322** | **403.0** | **0.0001** |
|  | Control + CD vs. Control + INT | 389.3 | 396.9 | -7.524 | 6 | 7 | 1.683 | 403.0 | 0.8416 |
|  | **Control + CD vs. AT + INT** | **389.3** | **413.7** | **-24.33** | **6** | **6** | **5.244** | **403.0** | **0.0032** |
|  | **AT + CD vs. Control + WD** | **388.7** | **435.3** | **-46.67** | **6** | **6** | **10.06** | **403.0** | **<0.0001** |
|  | **AT + CD vs. AT + WD** | **388.7** | **418.7** | **-30.00** | **6** | **6** | **6.466** | **403.0** | **<0.0001** |
|  | AT + CD vs. Control + INT | 388.7 | 396.9 | -8.190 | 6 | 7 | 1.832 | 403.0 | 0.7876 |
|  | **AT + CD vs. AT + INT** | **388.7** | **413.7** | **-25.00** | **6** | **6** | **5.388** | **403.0** | **0.0022** |
|  | Control + WD vs. AT + WD | 435.3 | 418.7 | 16.67 | 6 | 6 | 3.592 | 403.0 | 0.1151 |
|  | **Control + WD vs. Control + INT** | **435.3** | **396.9** | **38.48** | **6** | **7** | **8.606** | **403.0** | **<0.0001** |
|  | **Control + WD vs. AT + INT** | **435.3** | **413.7** | **21.67** | **6** | **6** | **4.670** | **403.0** | **0.0133** |
|  | **AT + WD vs. Control + INT** | **418.7** | **396.9** | **21.81** | **6** | **7** | **4.878** | **403.0** | **0.0081** |
|  | AT + WD vs. AT + INT | 418.7 | 413.7 | 5.000 | 6 | 6 | 1.078 | 403.0 | 0.9736 |
|  | Control + INT vs. AT + INT | 396.9 | 413.7 | -16.81 | 7 | 6 | 3.760 | 403.0 | 0.0861 |
|  |  |  |  |  |  |  |  |  |  |
|  | **Week 12** |  |  |  |  |  |  |  |  |
|  | Control + CD vs. AT + CD | 406.0 | 401.7 | 4.333 | 6 | 6 | 0.9339 | 403.0 | 0.9861 |
|  | **Control + CD vs. Control + WD** | **406.0** | **457.3** | **-51.33** | **6** | **6** | **11.06** | **403.0** | **<0.0001** |
|  | **Control + CD vs. AT + WD** | **406.0** | **439.0** | **-33.00** | **6** | **6** | **7.112** | **403.0** | **<0.0001** |
|  | Control + CD vs. Control + INT | 406.0 | 411.1 | -5.143 | 6 | 7 | 1.150 | 403.0 | 0.9650 |
|  | **Control + CD vs. AT + INT** | **406.0** | **428.0** | **-22.00** | **6** | **6** | **4.741** | **403.0** | **0.0112** |
|  | **AT + CD vs. Control + WD** | **401.7** | **457.3** | **-55.67** | **6** | **6** | **12.00** | **403.0** | **<0.0001** |
|  | **AT + CD vs. AT + WD** | **401.7** | **439.0** | **-37.33** | **6** | **6** | **8.046** | **403.0** | **<0.0001** |
|  | AT + CD vs. Control + INT | 401.7 | 411.1 | -9.476 | 6 | 7 | 2.119 | 403.0 | 0.6653 |
|  | **AT + CD vs. AT + INT** | **401.7** | **428.0** | **-26.33** | **6** | **6** | **5.675** | **403.0** | **0.0010** |
|  | Control + WD vs. AT + WD | 457.3 | 439.0 | 18.33 | 6 | 6 | 3.951 | 403.0 | 0.0605 |
|  | **Control + WD vs. Control + INT** | **457.3** | **411.1** | **46.19** | **6** | **7** | **10.33** | **403.0** | **<0.0001** |
|  | **Control + WD vs. AT + INT** | **457.3** | **428.0** | **29.33** | **6** | **6** | **6.322** | **403.0** | **0.0001** |
|  | **AT + WD vs. Control + INT** | **439.0** | **411.1** | **27.86** | **6** | **7** | **6.230** | **403.0** | **0.0002** |
|  | AT + WD vs. AT + INT | 439.0 | 428.0 | 11.00 | 6 | 6 | 2.371 | 403.0 | 0.5483 |
|  | Control + INT vs. AT + INT | 411.1 | 428.0 | -16.86 | 7 | 6 | 3.770 | 403.0 | 0.0845 |

**S Table 15.** Summary of statistics for **Supplemental Figure 8** – DTI metrics of hippocampal subfields and hypothalamic nuclei.

| **Fig.** | **ANOVA table** | **SS (Type III)** | **DF** | **MS** | **F (DFn, DFd)** | **P value** |
| --- | --- | --- | --- | --- | --- | --- |
| S Fig 8B - | **ROI** | **0.2875** | **21** | **0.01369** | **F (21, 242) = 12.94** | **<0.0001** |
| Three-way | **Sex** | **0.004118** | **1** | **0.004118** | **F (1, 242) = 3.892** | **0.0497** |
| ANOVA | Treatment | 0.0006184 | 1 | 0.0006184 | F (1, 242) = 0.5845 | 0.4453 |
|  | ROI x Sex | 0.009626 | 21 | 0.0004584 | F (21, 242) = 0.4333 | 0.9868 |
|  | ROI x Treatment | 0.004176 | 21 | 0.0001989 | F (21, 242) = 0.1880 | >0.9999 |
|  | **Sex x Treatment** | **0.01916** | **1** | **0.01916** | **F (1, 242) = 18.11** | **<0.0001** |
|  | ROI x Sex x Treatment | 0.02466 | 21 | 0.001174 | F (21, 242) = 1.110 | 0.3380 |
|  | Residual | 0.2560 | 242 | 0.001058 |  | <0.0001 |

| **Fig.** | **ANOVA table** | **SS (Type III)** | **DF** | **MS** | **F (DFn, DFd)** | **P value** |
| --- | --- | --- | --- | --- | --- | --- |
| S Fig 8C - | Interaction | 44.96 | 21 | 2.141 | F (21, 132) = 1.195 | 0.2657 |
| Females | ROI | 44.96 | 21 | 2.141 | F (21, 132) = 1.195 | 0.2657 |
|  | **Treatment** | **35.26** | **1** | **35.26** | **F (1, 132) = 19.68** | **<0.0001** |
|  | Residual | 236.5 | 132 | 1.792 |  |  |

|  | **Test details** | **Mean 1** | **Mean 2** | **Mean diff.** | **N1** | **N2** | **q** | **DF** | **P value** |
| --- | --- | --- | --- | --- | --- | --- | --- | --- | --- |
|  | Control - Treatment |  |  |  |  |  |  |  |  |
|  | AN | 0.000 | -0.4423 | 0.4423 | 4 | 4 | 0.4673 | 132.0 | >0.9999 |
|  | PVN | 0.000 | -0.9784 | 0.9784 | 4 | 4 | 1.034 | 132.0 | 0.9996 |
|  | R_DMH | 0.000 | -2.093 | 2.093 | 4 | 4 | 2.212 | 132.0 | 0.4731 |
|  | **L_DMH** | **0.000** | **-3.466** | **3.466** | **4** | **4** | **3.662** | **132.0** | **0.0079** |
|  | R_LHA | -2.500e-10 | -1.739 | 1.739 | 4 | 4 | 1.837 | 132.0 | 0.7897 |
|  | L_LHA | 0.000 | -1.371 | 1.371 | 4 | 4 | 1.449 | 132.0 | 0.9719 |
|  | R_VMH | 0.000 | -2.124 | 2.124 | 4 | 4 | 2.244 | 132.0 | 0.4464 |
|  | L_VMH | 0.000 | -2.235 | 2.235 | 4 | 4 | 2.361 | 132.0 | 0.3540 |
|  | R_DG | 0.000 | -0.9920 | 0.9920 | 4 | 4 | 1.048 | 132.0 | 0.9996 |
|  | L_DG | 0.000 | -0.2345 | 0.2345 | 4 | 4 | 0.2478 | 132.0 | >0.9999 |
|  | R_vCA1 | -2.500e-10 | -0.0201 | 0.02005 | 4 | 4 | 0.0212 | 132.0 | >0.9999 |
|  | L_vCA1 | 0.000 | 0.5443 | -0.5443 | 4 | 4 | 0.5751 | 132.0 | >0.9999 |
|  | R_vCA2 | 2.500e-10 | -0.3844 | 0.3844 | 4 | 4 | 0.4061 | 132.0 | >0.9999 |
|  | L_vCA2 | -2.500e-10 | 0.7105 | -0.7105 | 4 | 4 | 0.7506 | 132.0 | >0.9999 |
|  | R_vCA3 | 0.000 | -0.2788 | 0.2788 | 4 | 4 | 0.2946 | 132.0 | >0.9999 |
|  | L_vCA3 | 2.500e-10 | -1.336 | 1.336 | 4 | 4 | 1.411 | 132.0 | 0.9787 |
|  | R_dCA1 | 0.000 | -0.7520 | 0.7520 | 4 | 4 | 0.7946 | 132.0 | >0.9999 |
|  | L_dCA1 | 2.500e-10 | -0.4792 | 0.4792 | 4 | 4 | 0.5064 | 132.0 | >0.9999 |
|  | R_dCA2 | -2.500e-10 | -1.835 | 1.835 | 4 | 4 | 1.939 | 132.0 | 0.7098 |
|  | L_dCA2 | 0.000 | -0.3440 | 0.3440 | 4 | 4 | 0.3635 | 132.0 | >0.9999 |
|  | R_dCA3 | 0.000 | -0.0091 | 0.0091 | 4 | 4 | 0.0096 | 132.0 | >0.9999 |
|  | L_dCA3 | -2.500e-10 | 0.1644 | -0.1644 | 4 | 4 | 0.1737 | 132.0 | >0.9999 |

| **Fig.** | **ANOVA table** | **SS (Type III)** | **DF** | **MS** | **F (DFn, DFd)** | **P value** |
| --- | --- | --- | --- | --- | --- | --- |
| S Fig 8D - | **Interaction** | **162.8** | **21** | **7.755** | **F (21, 110) = 2.465** | **0.0013** |
| Males | **ROI** | **162.8** | **21** | **7.755** | **F (21, 110) = 2.465** | **0.0013** |
|  | **Treatment** | **37.13** | **1** | **37.13** | **F (1, 110) = 11.80** | **0.0008** |
|  | Residual | 346.1 | 110 | 3.146 |  |  |

|  | **Test details** | **Mean 1** | **Mean 2** | **Mean diff.** | **N1** | **N2** | **q** | **DF** | **P value** |
| --- | --- | --- | --- | --- | --- | --- | --- | --- | --- |
|  | Control - Treatment |  |  |  |  |  |  |  |  |
|  | AN | -3.331e-16 | 0.02018 | -0.02018 | 3 | 4 | 0.0149 | 110.0 | >0.9999 |
|  | PVN | -3.331e-16 | 0.7505 | -0.7505 | 3 | 4 | 0.5540 | 110.0 | >0.9999 |
|  | R_DMH | -3.331e-16 | 0.9051 | -0.9051 | 3 | 4 | 0.6681 | 110.0 | >0.9999 |
|  | L_DMH | -3.331e-16 | 0.8541 | -0.8541 | 3 | 4 | 0.6305 | 110.0 | >0.9999 |
|  | **R_LHA** | **-1.332e-15** | **7.180** | **-7.180** | **3** | **4** | **5.300** | **110.0** | <0.0001 |
|  | **L_LHA** | **-3.333e-10** | **7.737** | **-7.737** | **3** | **4** | **5.712** | **110.0** | <0.0001 |
|  | R_VMH | -4.441e-16 | 0.7025 | -0.7025 | 3 | 4 | 0.5185 | 110.0 | >0.9999 |
|  | L_VMH | 4.441e-16 | 1.033 | -1.033 | 3 | 4 | 0.7625 | 110.0 | >0.9999 |
|  | R_DG | 3.333e-10 | 0.4622 | -0.4622 | 3 | 4 | 0.3412 | 110.0 | >0.9999 |
|  | L_DG | 4.441e-16 | 0.3129 | -0.3129 | 3 | 4 | 0.2309 | 110.0 | >0.9999 |
|  | R_vCA1 | 0.000 | 0.2697 | -0.2697 | 3 | 4 | 0.1991 | 110.0 | >0.9999 |
|  | L_vCA1 | 5.551e-16 | 0.02865 | -0.02865 | 3 | 4 | 0.0212 | 110.0 | >0.9999 |
|  | R_vCA2 | 6.661e-16 | 0.03337 | -0.03337 | 3 | 4 | 0.0246 | 110.0 | >0.9999 |
|  | L_vCA2 | 8.882e-16 | -0.5621 | 0.5621 | 3 | 4 | 0.4150 | 110.0 | >0.9999 |
|  | R_vCA3 | 3.333e-10 | 0.2050 | -0.2050 | 3 | 4 | 0.1513 | 110.0 | >0.9999 |
|  | L_vCA3 | 8.882e-16 | 0.02742 | -0.02742 | 3 | 4 | 0.0202 | 110.0 | >0.9999 |
|  | R_dCA1 | 8.882e-16 | 0.5674 | -0.5674 | 3 | 4 | 0.4188 | 110.0 | >0.9999 |
|  | L_dCA1 | -3.333e-10 | 0.2521 | -0.2521 | 3 | 4 | 0.1861 | 110.0 | >0.9999 |
|  | R_dCA2 | -3.333e-10 | 0.4470 | -0.4470 | 3 | 4 | 0.3300 | 110.0 | >0.9999 |
|  | L_dCA2 | -3.333e-10 | 0.4144 | -0.4144 | 3 | 4 | 0.3059 | 110.0 | >0.9999 |
|  | R_dCA3 | 7.772e-16 | 0.2307 | -0.2307 | 3 | 4 | 0.1703 | 110.0 | >0.9999 |
|  | L_dCA3 | 0.000 | -0.04234 | 0.04234 | 3 | 4 | 0.0313 | 110.0 | >0.9999 |

**S Table 16.** Summary of statistics for **Supplemental Figure 9** – FA along left vCA1-DMH neurocircuit. To complement the ANOVA and t-test results, we calculated effect sizes for the FA changes along the left vCA1–DMH pathway. In females (S Fig. 9F), the interaction term yielded a partial eta squared of η²p = 0.26 (Cohen’s *f* = 0.59), indicating a large effect. In males (S Fig. 9G), the interaction similarly showed a large effect (η²p = 0.29; *f* = 0.63). For the percent-difference comparison (S Fig. 9H), the two-sided t-test produced a small-to-moderate effect (Cohen’s d = 0.29), consistent with modest group-level differences despite statistical significance. These values confirm that the interaction effects detected in the ANOVAs reflect robust group differences, whereas the post hoc pairwise percent-difference comparison captured a weaker but still meaningful effect.

| **Fig.** | **ANOVA table** | **SS (Type III)** | **DF** | **MS** | **F (DFn, DFd)** | **P value** |
| --- | --- | --- | --- | --- | --- | --- |
| S Fig 9F - | **Interaction** | **1.381** | **99** | **0.01395** | **F (99, 500) = 1.795** | **<0.0001** |
| Females | Bin | 0.6242 | 99 | 0.006305 | F (99, 500) = 0.8113 | 0.8991 |
|  | Treatment | 0.0002627 | 1 | 0.0002627 | F (1, 500) = 0.03381 | 0.8542 |
|  | Residual | 3.886 | 500 | 0.007771 |  |  |

| **Fig.** | **ANOVA table** | **SS (Type III)** | **DF** | **MS** | **F (DFn, DFd)** | **P value** |
| --- | --- | --- | --- | --- | --- | --- |
| S Fig 9G - | **Interaction** | **1.197** | **99** | **0.01209** | **F (99, 500) = 2.020** | **<0.0001** |
| Males | **Bin** | **1.077** | **99** | **0.01088** | **F (99, 500) = 1.818** | **<0.0001** |
|  | Treatment | 0.01319 | 1 | 0.01319 | F (1, 500) = 2.205 | 0.1382 |
|  | Residual | 2.992 | 500 | 0.005983 |  |  |

| **Fig.** | **Test** | **Mean A** | **Mean B** | **Mean diff.** | **SEM** | **t** | **Df** | **P value** | **R squared** |
| --- | --- | --- | --- | --- | --- | --- | --- | --- | --- |
| S Fig 9H - | Two-sided | **8.710** | **-1.630** | -10.34 | 5.098 | 2.028 | 198 | 0.0439 | 0.02036 |
| %-difference | t test |  |  |  |  |  |  |  |  |

**S Table 17.** Summary of statistics for **Supplemental Figure 10** – Estrous Cycle

| **Fig.** | **ANOVA table** | **SS (Type III)** | **DF** | **MS** | **F (DFn, DFd)** | **P value** |
| --- | --- | --- | --- | --- | --- | --- |
| S Fig 10A - | Interaction | 19.93 | 2 | 9.964 | F (2, 18) = 0.1115 | 0.8951 |
| Proestrus | Stress | 167.5 | 1 | 167.5 | F (1, 18) = 1.874 | 0.1879 |
|  | Diet | 219.4 | 2 | 109.7 | F (2, 18) = 1.227 | 0.3165 |
|  | Residual | 1609 | 18 | 89.40 |  |  |

| **Fig.** | **ANOVA table** | **SS (Type III)** | **DF** | **MS** | **F (DFn, DFd)** | **P value** |
| --- | --- | --- | --- | --- | --- | --- |
| S Fig 10B - | Interaction | 68.80 | 2 | 34.40 | F (2, 18) = 0.3482 | 0.7106 |
| Estrus | Stress | 32.33 | 1 | 32.33 | F (1, 18) = 0.3272 | 0.5744 |
|  | Diet | 21.51 | 2 | 10.76 | F (2, 18) = 0.1089 | 0.8974 |
|  | Residual | 1778 | 18 | 98.79 |  |  |

| **Fig.** | **ANOVA table** | **SS (Type III)** | **DF** | **MS** | **F (DFn, DFd)** | **P value** |
| --- | --- | --- | --- | --- | --- | --- |
| S Fig 10C - | **Interaction** | **481.6** | **2** | **240.8** | **F (2, 18) = 4.494** | **0.0261** |
| Metestrus | Stress | 108.1 | 1 | 108.1 | F (1, 18) = 2.018 | 0.1725 |
|  | Diet | 89.68 | 2 | 44.84 | F (2, 18) = 0.8367 | 0.4493 |
|  | Residual | 964.6 | 18 | 53.59 |  |  |

|  | **Test details** | **Mean 1** | **Mean 2** | **Mean diff.** | **N1** | **N2** | **q** | **DF** | **P value** |
| --- | --- | --- | --- | --- | --- | --- | --- | --- | --- |
|  | Control:CD vs. Control:WD | 23.40 | 30.33 | -6.933 | 5 | 3 | 1.834 | 18.00 | 0.7829 |
|  | Control:CD vs. Control:INT | 23.40 | 25.00 | -1.600 | 5 | 4 | 0.4608 | 18.00 | 0.9994 |
|  | Control:CD vs. AT:CD | 23.40 | 39.00 | -15.60 | 5 | 3 | 4.127 | 18.00 | 0.0827 |
|  | Control:CD vs. AT:WD | 23.40 | 22.75 | 0.6500 | 5 | 4 | 0.1872 | 18.00 | >0.9999 |
|  | Control:CD vs. AT:INT | 23.40 | 30.00 | -6.600 | 5 | 5 | 2.016 | 18.00 | 0.7121 |
|  | Control:WD vs. Control:INT | 30.33 | 25.00 | 5.333 | 3 | 4 | 1.349 | 18.00 | 0.9265 |
|  | Control:WD vs. AT:CD | 30.33 | 39.00 | -8.667 | 3 | 3 | 2.051 | 18.00 | 0.6979 |
|  | Control:WD vs. AT:WD | 30.33 | 22.75 | 7.583 | 3 | 4 | 1.918 | 18.00 | 0.7510 |
|  | Control:WD vs. AT:INT | 30.33 | 30.00 | 0.3333 | 3 | 5 | 0.08818 | 18.00 | >0.9999 |
|  | Control:INT vs. AT:CD | 25.00 | 39.00 | -14.00 | 4 | 3 | 3.541 | 18.00 | 0.1746 |
|  | Control:INT vs. AT:WD | 25.00 | 22.75 | 2.250 | 4 | 4 | 0.6147 | 18.00 | 0.9977 |
|  | Control:INT vs. AT:INT | 25.00 | 30.00 | -5.000 | 4 | 5 | 1.440 | 18.00 | 0.9058 |
|  | AT:CD vs. AT:WD | 39.00 | 22.75 | 16.25 | 3 | 4 | 4.110 | 18.00 | 0.0846 |
|  | AT:CD vs. AT:INT | 39.00 | 30.00 | 9.000 | 3 | 5 | 2.381 | 18.00 | 0.5586 |
|  | AT:WD vs. AT:INT | 22.75 | 30.00 | -7.250 | 4 | 5 | 2.088 | 18.00 | 0.6825 |

| **Fig.** | **ANOVA table** | **SS (Type III)** | **DF** | **MS** | **F (DFn, DFd)** | **P value** |
| --- | --- | --- | --- | --- | --- | --- |
| S Fig 10D - | **Interaction** | **481.6** | **2** | **240.8** | **F (2, 18) = 4.494** | **0.0261** |
| Diestrus | Stress | 108.1 | 1 | 108.1 | F (1, 18) = 2.018 | 0.1725 |
|  | Diet | 89.68 | 2 | 44.84 | F (2, 18) = 0.8367 | 0.4493 |
|  | Residual | 964.6 | 18 | 53.59 |  |  |

|  | **Test details** | **Mean 1** | **Mean 2** | **Mean diff.** | **N1** | **N2** | **q** | **DF** | **P value** |
| --- | --- | --- | --- | --- | --- | --- | --- | --- | --- |
|  | Control:CD vs. Control:WD | 31.40 | 11.00 | 20.40 | 5 | 3 | 4.194 | 18.00 | 0.0756 |
|  | Control:CD vs. Control:INT | 31.40 | 23.00 | 8.400 | 5 | 4 | 1.880 | 18.00 | 0.7656 |
|  | Control:CD vs. AT:CD | 31.40 | 19.33 | 12.07 | 5 | 3 | 2.481 | 18.00 | 0.5166 |
|  | Control:CD vs. AT:WD | 31.40 | 33.50 | -2.100 | 5 | 4 | 0.4700 | 18.00 | 0.9994 |
|  | Control:CD vs. AT:INT | 31.40 | 25.00 | 6.400 | 5 | 5 | 1.519 | 18.00 | 0.8852 |
|  | Control:WD vs. Control:INT | 11.00 | 23.00 | -12.00 | 3 | 4 | 2.359 | 18.00 | 0.5678 |
|  | Control:WD vs. AT:CD | 11.00 | 19.33 | -8.333 | 3 | 3 | 1.532 | 18.00 | 0.8816 |
|  | Control:WD vs. AT:WD | 11.00 | 33.50 | -22.50 | 3 | 4 | 4.423 | 18.00 | 0.0552 |
|  | Control:WD vs. AT:INT | 11.00 | 25.00 | -14.00 | 3 | 5 | 2.878 | 18.00 | 0.3618 |
|  | Control:INT vs. AT:CD | 23.00 | 19.33 | 3.667 | 4 | 3 | 0.7208 | 18.00 | 0.9951 |
|  | Control:INT vs. AT:WD | 23.00 | 33.50 | -10.50 | 4 | 4 | 2.230 | 18.00 | 0.6229 |
|  | Control:INT vs. AT:INT | 23.00 | 25.00 | -2.000 | 4 | 5 | 0.4477 | 18.00 | 0.9995 |
|  | AT:CD vs. AT:WD | 19.33 | 33.50 | -14.17 | 3 | 4 | 2.785 | 18.00 | 0.3958 |
|  | AT:CD vs. AT:INT | 19.33 | 25.00 | -5.667 | 3 | 5 | 1.165 | 18.00 | 0.9592 |
|  | AT:WD vs. AT:INT | 33.50 | 25.00 | 8.500 | 4 | 5 | 1.903 | 18.00 | 0.7571 |
